# Supplementary material
Source: publisher figshare collection journal article supplement (https://acs.figshare.com/ndownloader/files/27393982)

# Base-mediated Intramolecular Cyclization of $\alpha$ -Nitroethylallenic Esters as a Synthetic Route to 5-Hydroxy-3-pyrrolin-2-ones

Narendra Kumar Vaishanv,<sup>†</sup> Mohd Khalid Zaheer,<sup>†</sup> Sandeep Kumar,<sup>†</sup> Ruchir Kant,<sup>§</sup>  
and Kishor Mohanan<sup>†,‡,\*</sup>

<sup>†</sup>Medicinal & Process Chemistry Division and <sup>§</sup>Molecular and Structural Biology Division,  
CSIR-Central Drug Research Institute, BS-10/1, Sector 10, Jankipuram extension, Sitapur  
Road, P.O. Box 173, Lucknow 226031, India

<sup>‡</sup>Academy of Scientific and Innovative Research, Ghaziabad-201002, India

*kishor.mohanan@cdri.res.in*

## SUPPORTING INFORMATION

### Contents:

|                                                                           |    |
|---------------------------------------------------------------------------|----|
| 1. X-ray data of compounds <b>2f</b> and <b>4e</b>                        | S2 |
| 2. Copies of <sup>1</sup> H and <sup>13</sup> C spectra for all compounds | S5 |

### X-Ray Data Collection and Structure Refinement Details for compound **2f**:

A good quality single crystal of size 0.37 x 0.20 x 0.10 mm, was selected under a polarizing microscope and was mounted on a glass fiber for data collection. Single crystal X-ray data for compound **2f** were collected on the Rigaku Kappa 3 circle diffractometer equipped with the AFC12 goniometer and enhanced sensitivity (HG) Saturn724+ CCD detector in the 4x4 bin mode using the monochromated Mo-K $\alpha$  radiation generated from the microfocus sealed tube MicroMax-003 X-ray generator equipped with specially designed confocal multilayer optics. Data collection was performed using  $\omega$ -scans of 0.5 $^\circ$  steps at 293(2) K. Cell determination, data collection and data reduction was performed using the Rigaku CrystalClear-SM Expert 2.1 b24 software.<sup>1</sup> Structure solution and refinement were performed by using SHELXTL-NT.<sup>2</sup> Refinement of coordinates and anisotropic thermal parameters of non-hydrogen atoms were carried out by the full-matrix least-squares method. The hydrogen atoms attached to carbon atoms were generated with idealized geometries and isotropically refined using a riding model.

**Crystallization:** The compound **2f** (5mg) was dissolved in a 1ml mixture of *n*-hexane/DCM (2:1) and placed in a cabinet to evaporate slowly. After two days, **2f** was obtained as white crystal.

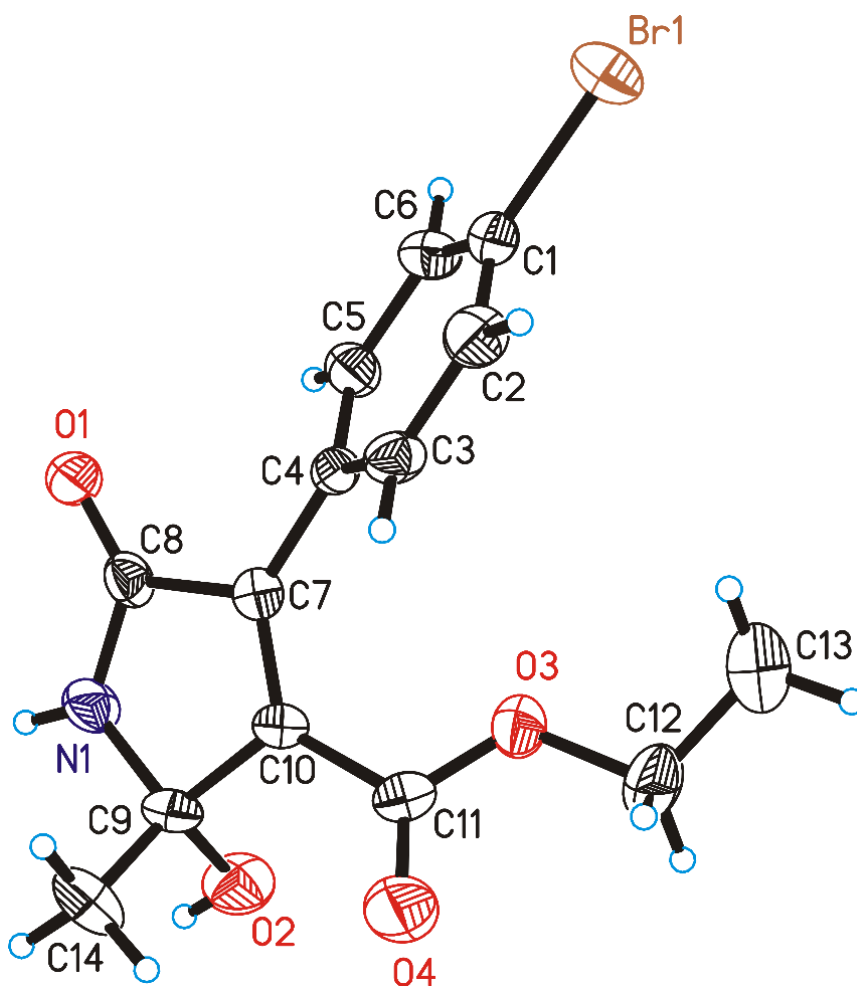

**Figure S1.** ORTEP diagram drawn with 30% ellipsoid probability for non-H atoms of the crystal structure of compound **2f** determined at 293 K.

**Table S1** Crystal data and structure refinement details for **2f**.

| Compound                                                                 | <b>2f</b>                                             |
|--------------------------------------------------------------------------|-------------------------------------------------------|
| Empirical formula                                                        | C <sub>14</sub> H <sub>14</sub> Br N O <sub>4.5</sub> |
| Formula weight                                                           | 348.17                                                |
| Crystal System                                                           | Monoclinic                                            |
| Space group                                                              | <i>P</i> 2 <sub>1</sub> /n                            |
| <i>a</i> (Å)                                                             | 9.838(4)                                              |
| <i>b</i> (Å)                                                             | 15.861(6)                                             |
| <i>c</i> (Å)                                                             | 20.361(9)                                             |
| $\alpha$ (°)                                                             | 90.00                                                 |
| $\beta$ (°)                                                              | 101.9810(10)                                          |
| $\gamma$ (°)                                                             | 90.00                                                 |
| <i>V</i> (Å <sup>3</sup> )                                               | 3108(2)                                               |
| <i>Z</i>                                                                 | 8                                                     |
| <i>D<sub>c</sub></i> (g/cm <sup>3</sup> )                                | 1.488                                                 |
| <i>F</i> <sub>000</sub>                                                  | 1408                                                  |
| $\mu$ (mm <sup>-1</sup> )                                                | 2.660                                                 |
| $\theta_{\max}$ (°)                                                      | 25.36                                                 |
| Total reflections                                                        | 19146                                                 |
| Unique reflections                                                       | 5580                                                  |
| Reflections [ <i>I</i> > 2 $\sigma$ ( <i>I</i> )]                        | 2173                                                  |
| Parameters                                                               | 376                                                   |
| <i>R</i> <sub>int</sub>                                                  | 0.1136                                                |
| Goodness-of-fit                                                          | 1.007                                                 |
| <i>R</i> [ <i>F</i> <sup>2</sup> > 2 $\sigma$ ( <i>F</i> <sup>2</sup> )] | 0.0731                                                |
| <i>wR</i> ( <i>F</i> <sup>2</sup> , all data)                            | 0.1412                                                |
| CCDC No.                                                                 | 2006864                                               |

**X-Ray Data Collection and Structure Refinement Details for compound 4e:**

A good quality single crystal of size 0.43 x 0.23x 0.19 mm, was selected under a polarizing microscope and was mounted on a glass fiber for data collection. Single crystal X-ray data for compound **4e** were collected on the Rigaku Kappa 3 circle diffractometer equipped with the AFC12 goniometer and enhanced sensitivity (HG) Saturn724+ CCD detector in the 4x4 bin mode using the monochromated Mo-K $\alpha$  radiation generated from the microfocus sealed tube MicroMax-003 X-ray generator equipped with specially designed confocal multilayer optics. Data collection was performed using  $\omega$ -scans of 0.5° steps at 293(2) K. Cell determination, data collection and data reduction was performed using the Rigaku CrystalClear-SM Expert 2.1 b24 software.<sup>1</sup> Structure solution and refinement were performed by using SHELXTL-NT.<sup>2</sup> Refinement of coordinates and anisotropic thermal parameters of non-hydrogen atoms were carried out by the full-matrix least-squares method. The hydrogen atoms attached to carbon atoms were generated with idealized geometries and isotropically refined using a riding model.

**Crystallization:** The compound **4e** (5mg) was dissolved in a 1mL mixture of *n*-hexane/DCM/acetone (2:1:1) and placed in a cabinet to evaporate slowly. After two days, **4e** was obtained as white crystal.

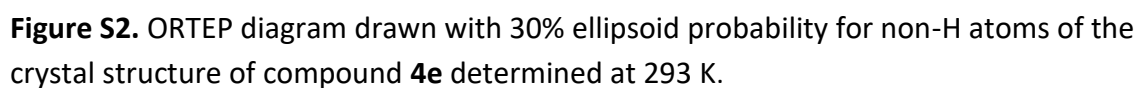

| Compound                                                                 | 4e                                                            |
|--------------------------------------------------------------------------|---------------------------------------------------------------|
| Empirical formula                                                        | C <sub>25</sub> H <sub>24</sub> N <sub>2</sub> O <sub>3</sub> |
| Formula weight                                                           | 400.46                                                        |
| Crystal System                                                           | Triclinic                                                     |
| Space group                                                              | <i>P</i> -1                                                   |
| <i>a</i> (Å)                                                             | 9.3094(3)                                                     |
| <i>b</i> (Å)                                                             | 9.4648(3)                                                     |
| <i>c</i> (Å)                                                             | 13.4239(4)                                                    |
| $\alpha$ (°)                                                             | 70.898(3)                                                     |
| $\beta$ (°)                                                              | 76.491(3)                                                     |
| $\gamma$ (°)                                                             | 77.185(3)                                                     |
| <i>V</i> (Å <sup>3</sup> )                                               | 1073.07(6)                                                    |
| <i>Z</i>                                                                 | 2                                                             |
| D <sub>c</sub> (g/cm <sup>3</sup> )                                      | 1.239                                                         |
| <i>F</i> <sub>000</sub>                                                  | 424                                                           |
| $\mu$ (mm <sup>-1</sup> )                                                | 0.656                                                         |
| $\theta_{\text{max}}$ (°)                                                | 72.80                                                         |
| Total reflections                                                        | 21777                                                         |
| Unique reflections                                                       | 4045                                                          |
| Reflections [ <i>I</i> > 2 $\sigma$ ( <i>I</i> )]                        | 3638                                                          |
| Parameters                                                               | 282                                                           |
| <i>R</i> <sub>int</sub>                                                  | 0.1291                                                        |
| Goodness-of-fit                                                          | 1.084                                                         |
| <i>R</i> [ <i>F</i> <sup>2</sup> > 2 $\sigma$ ( <i>F</i> <sup>2</sup> )] | 0.0756                                                        |
| <i>wR</i> ( <i>F</i> <sup>2</sup> , all data)                            | 0.2164                                                        |
| CCDC No.                                                                 | 2009054                                                       |

- S4

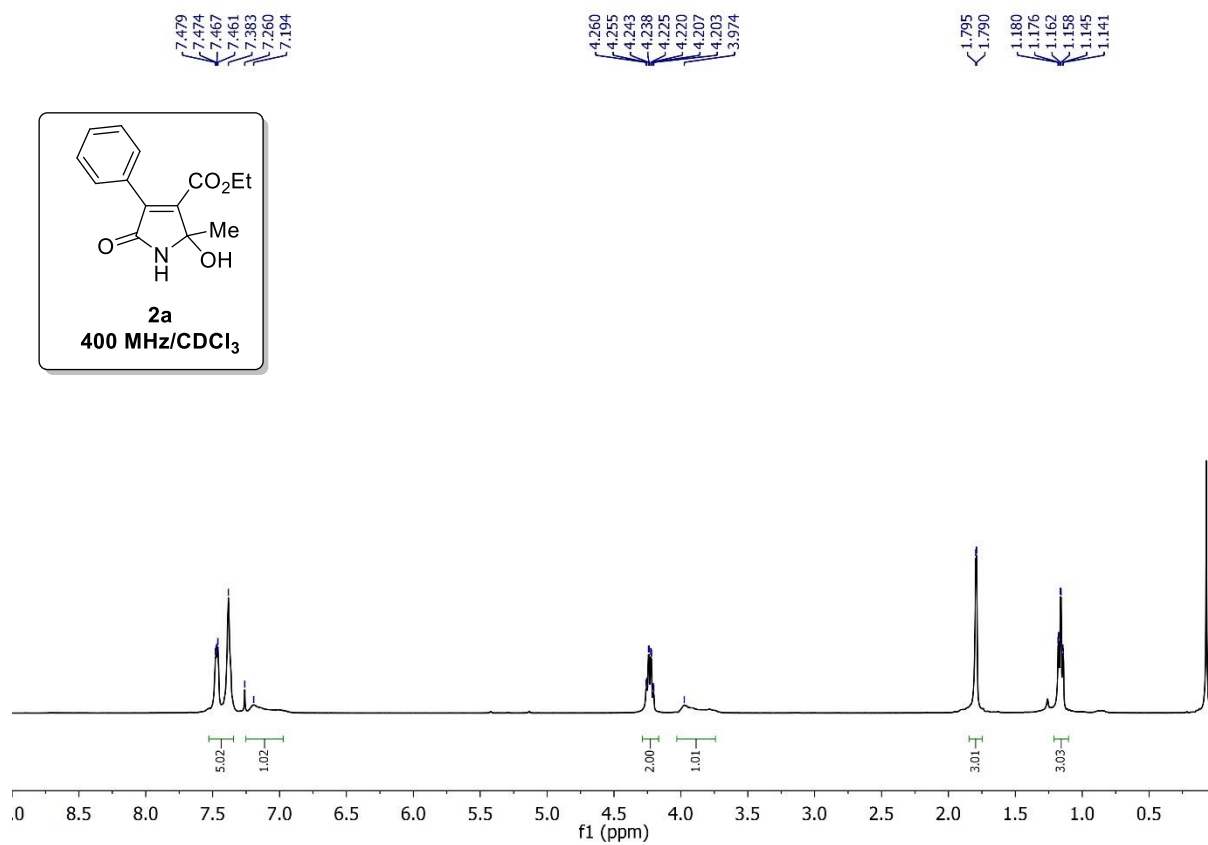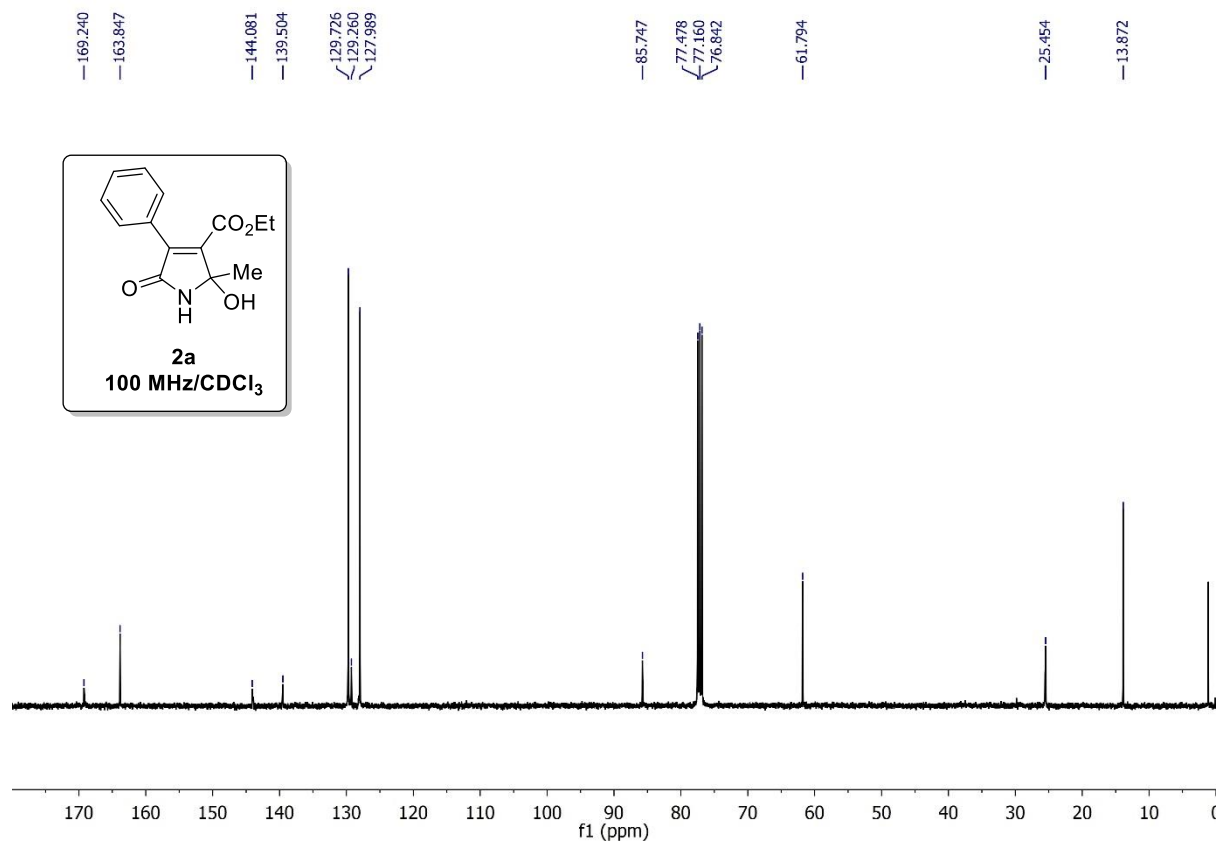

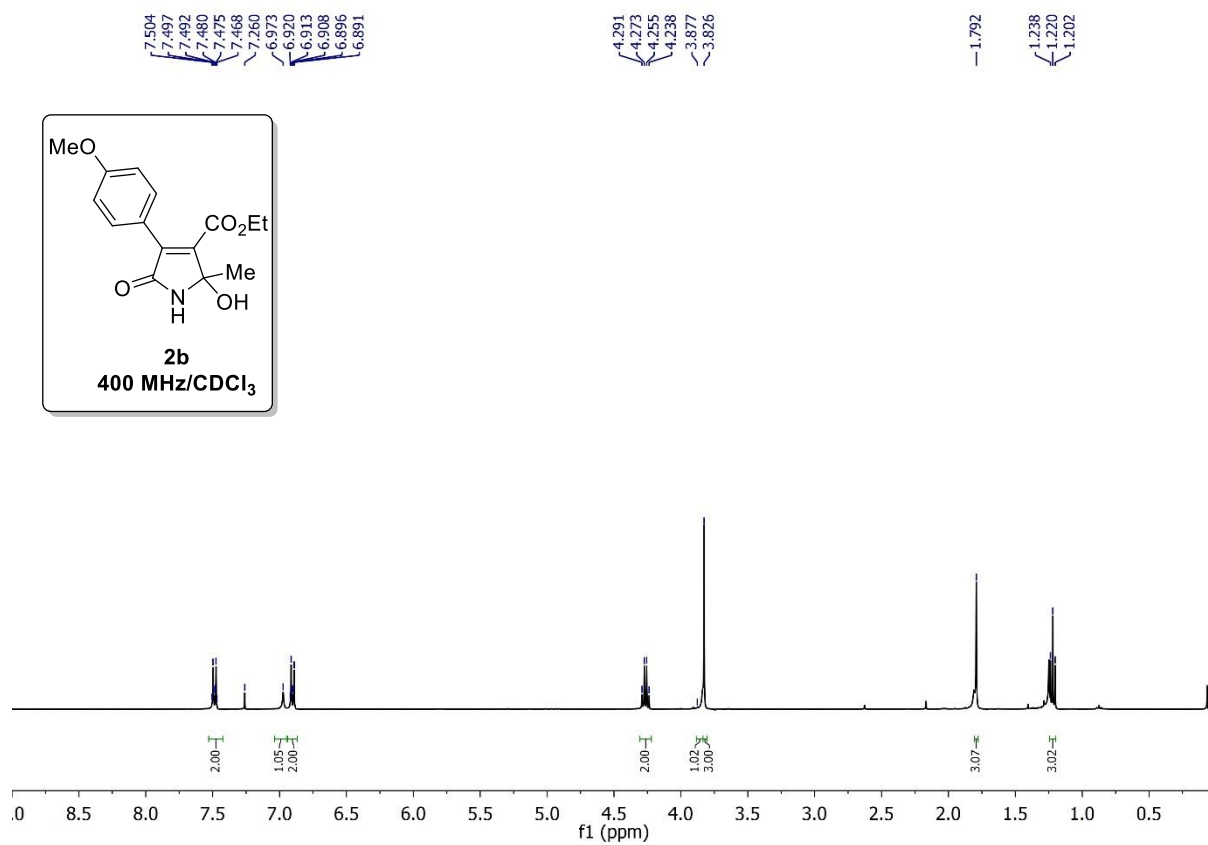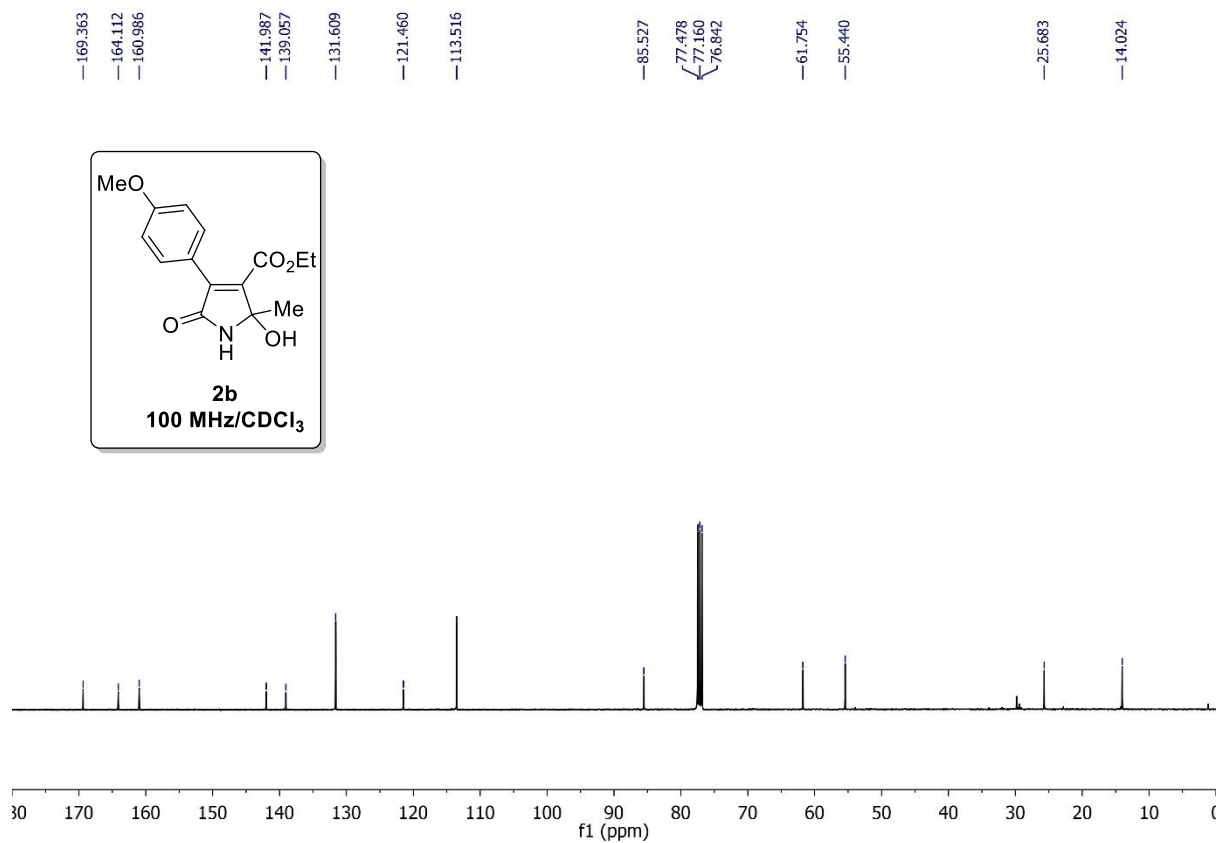

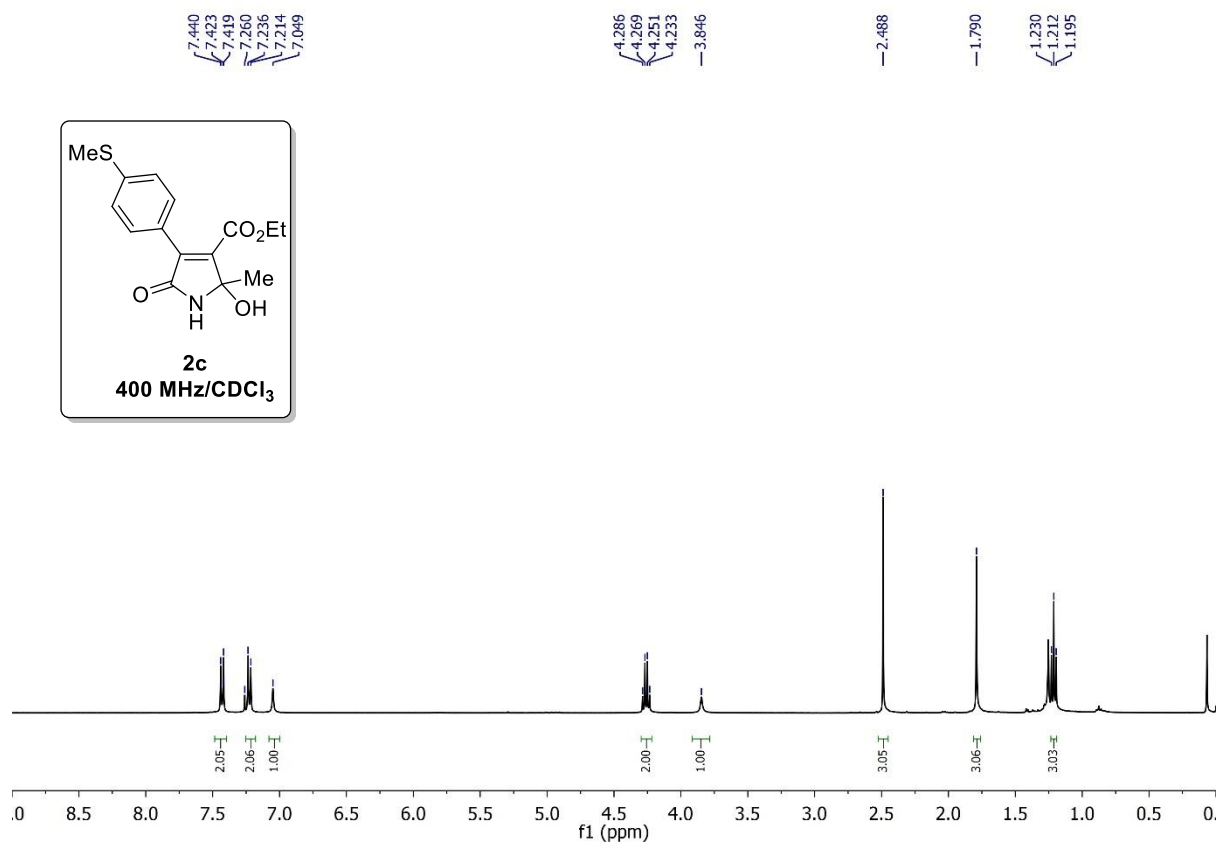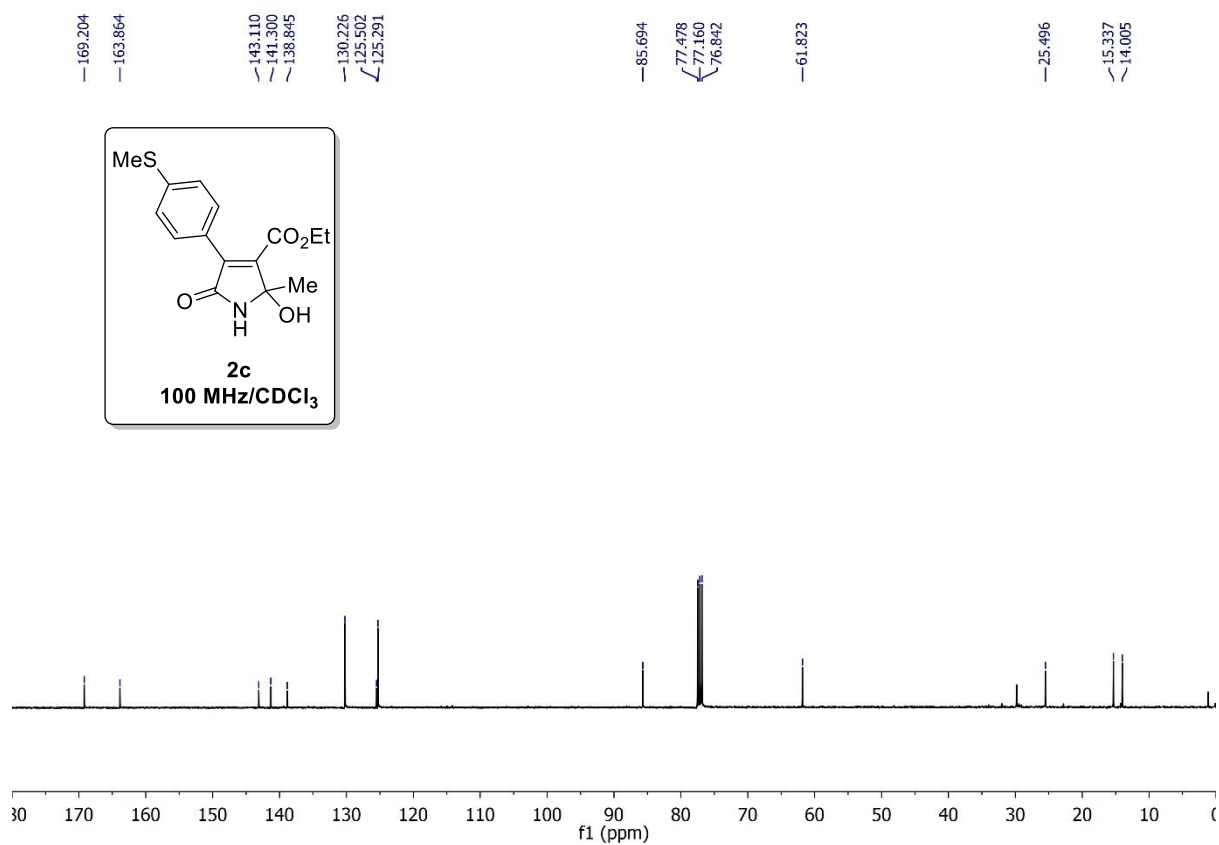

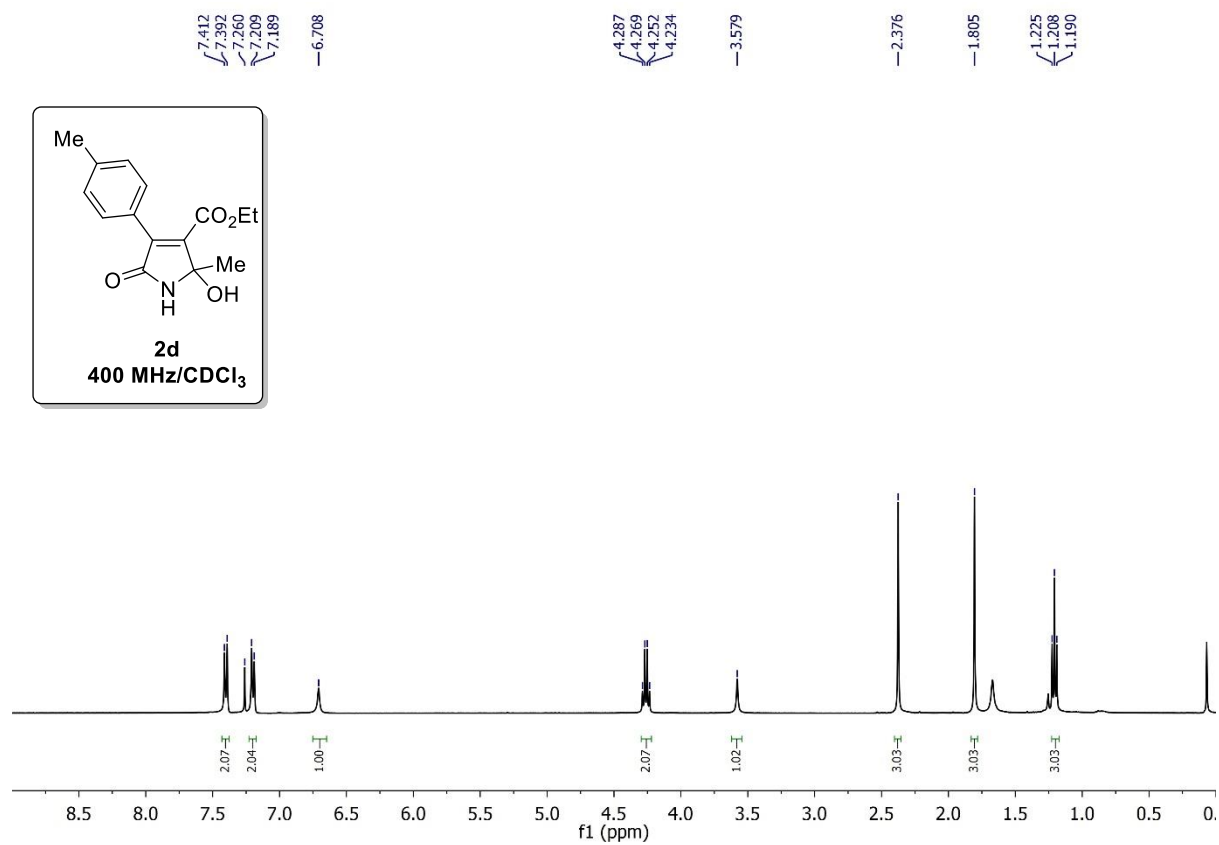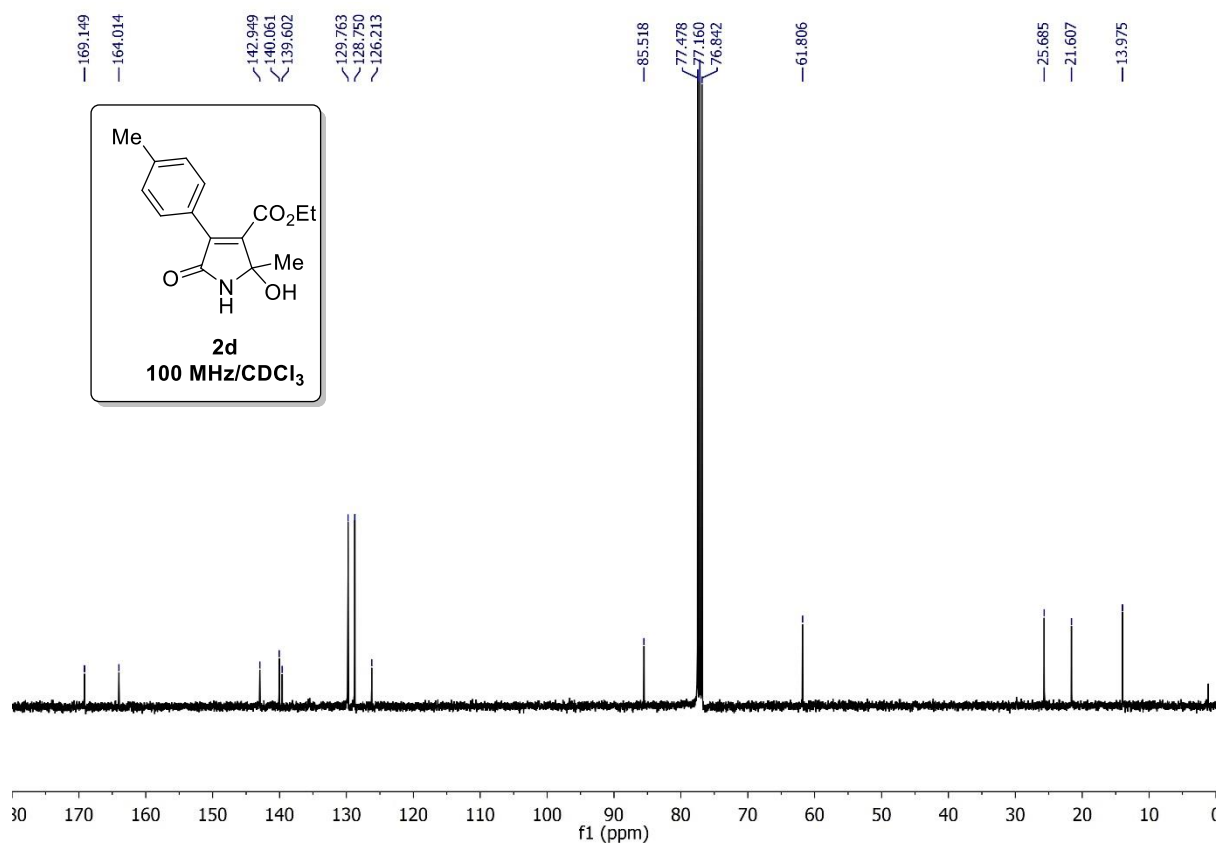



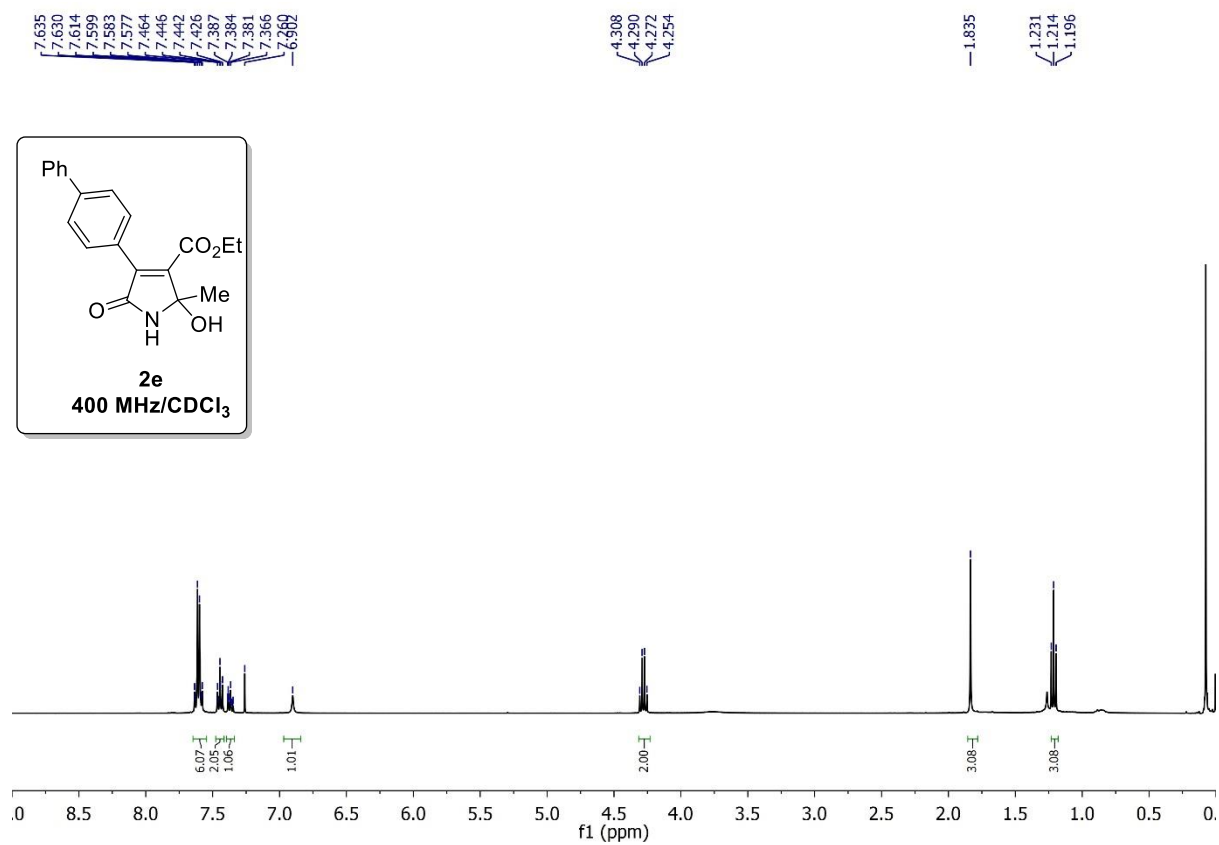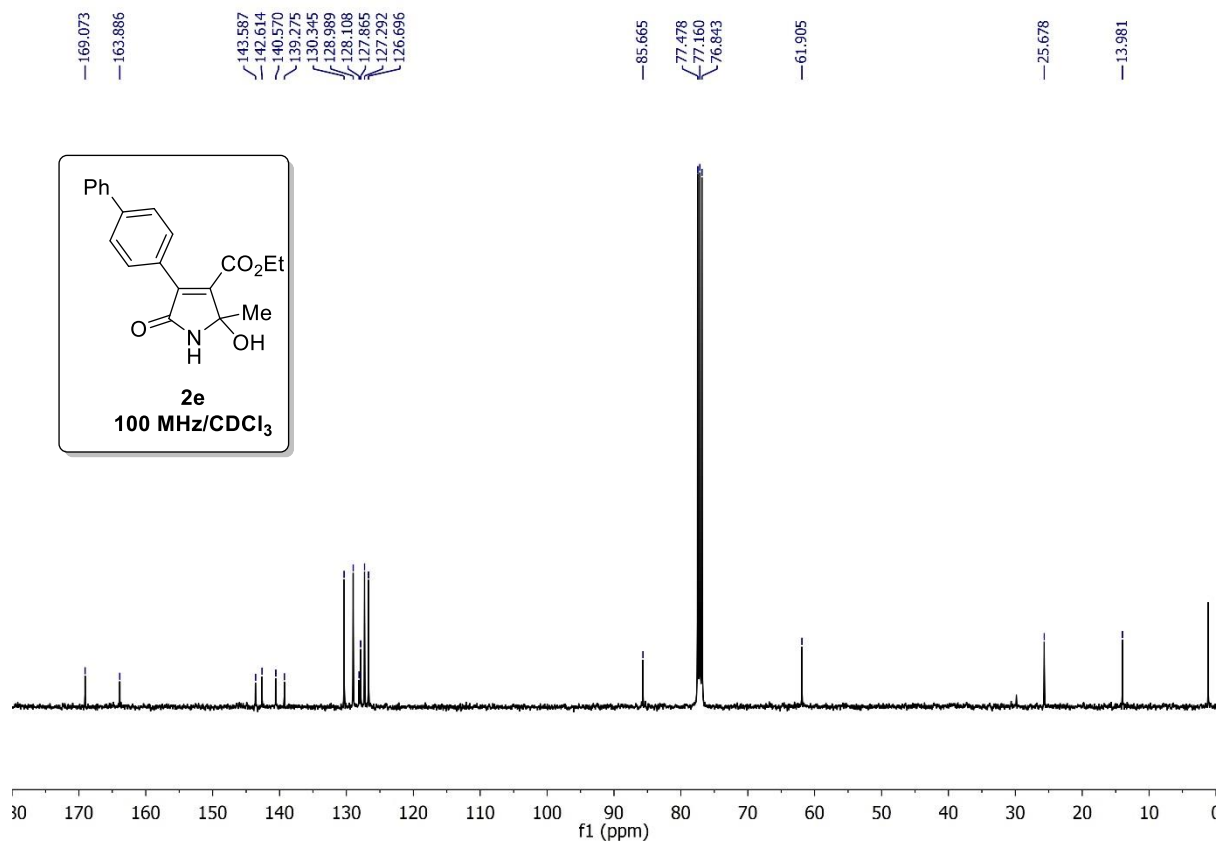

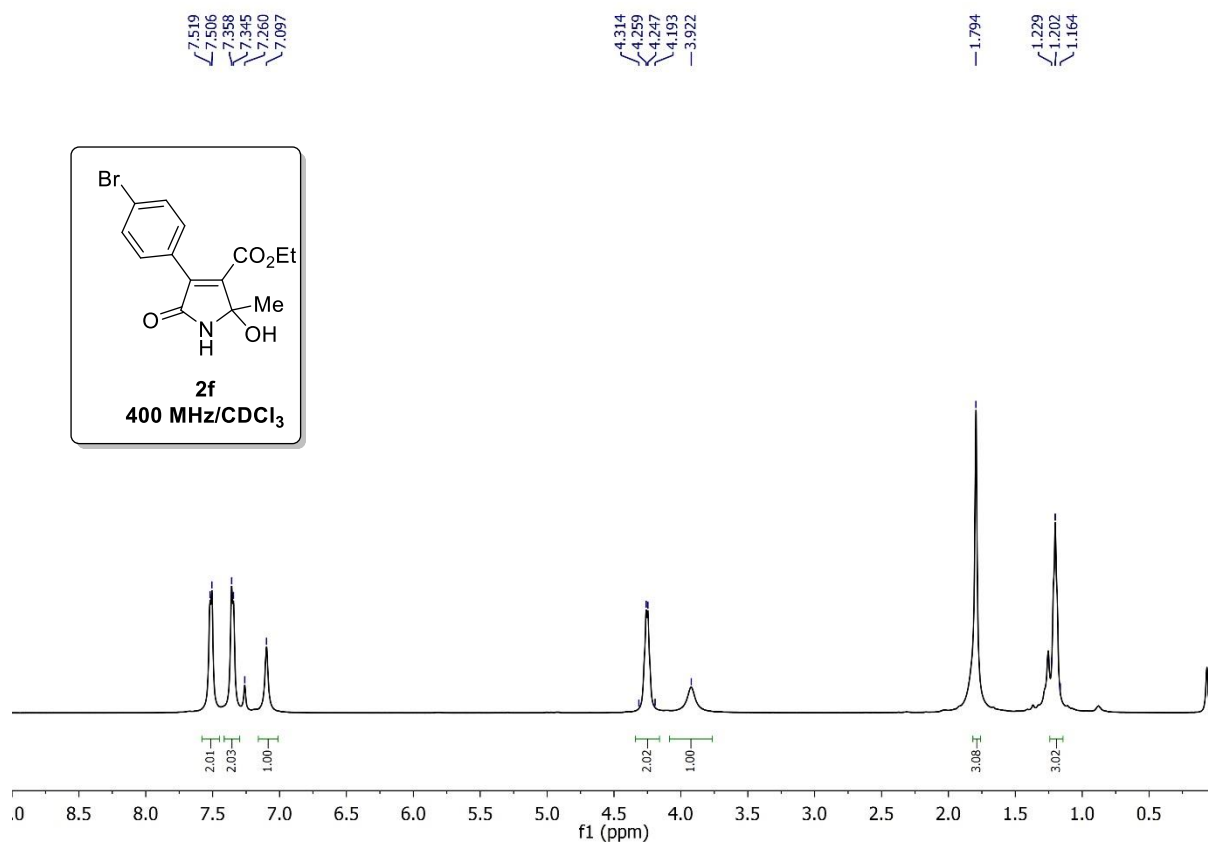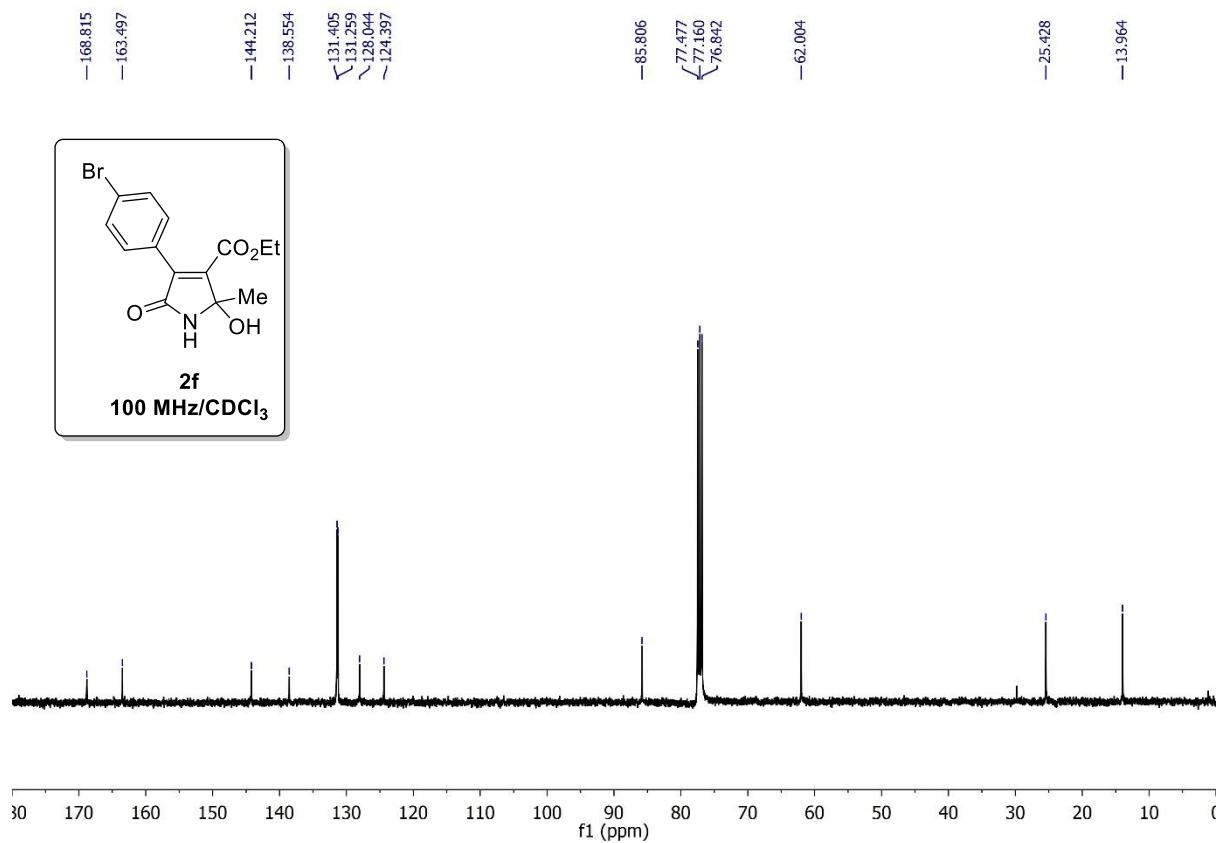

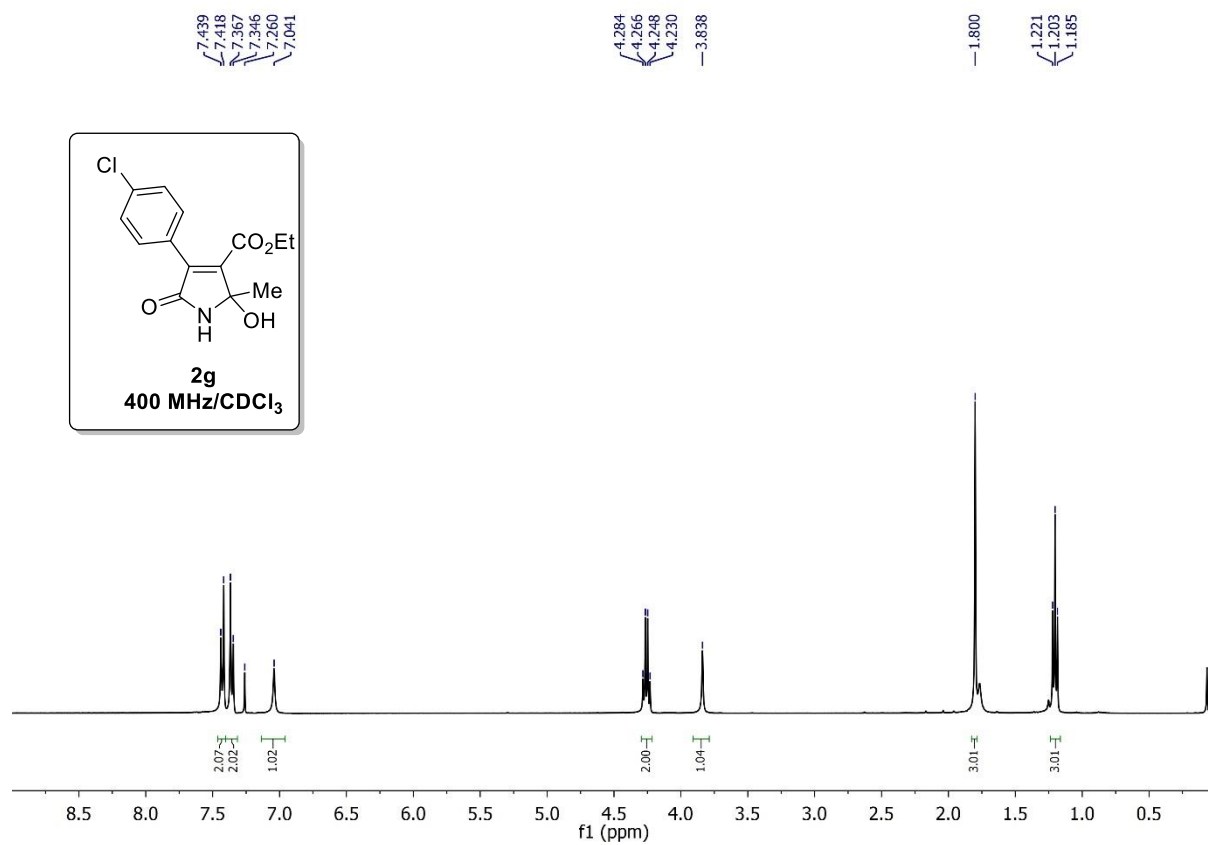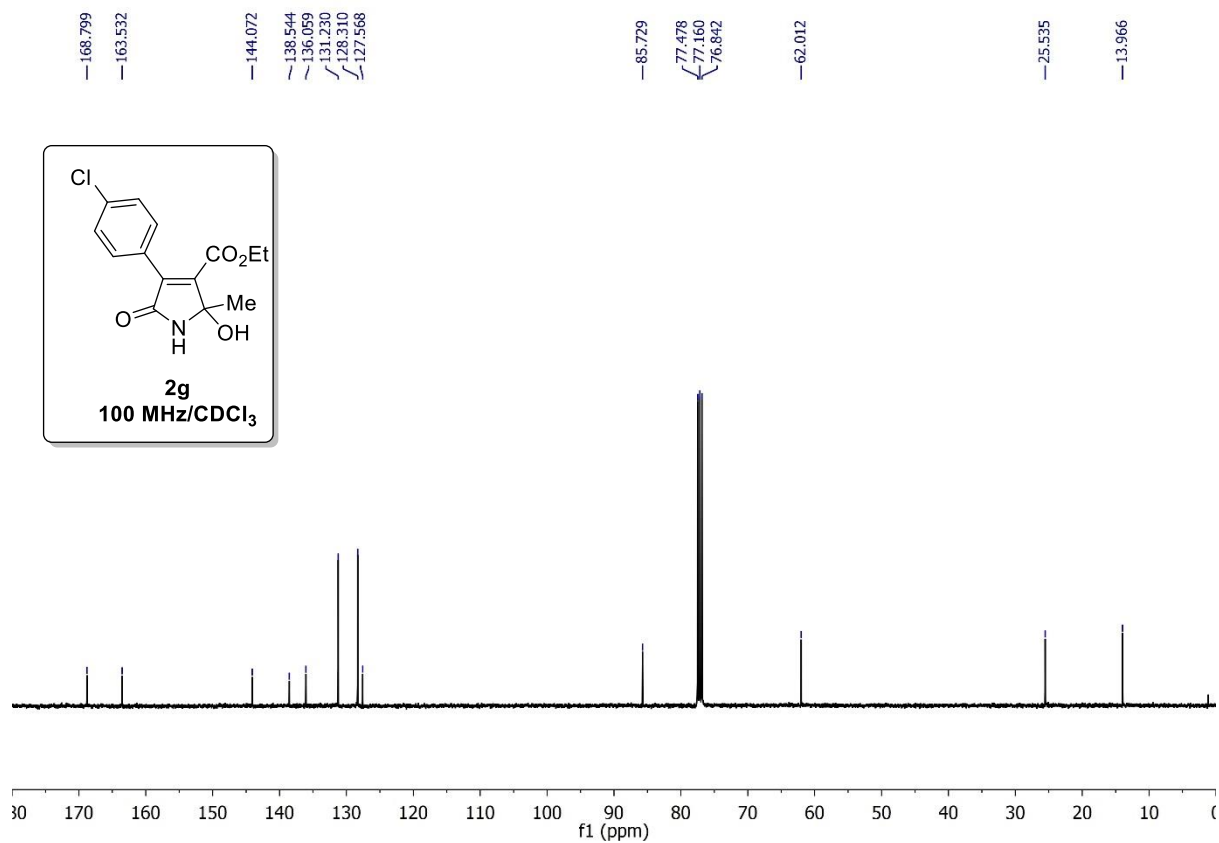

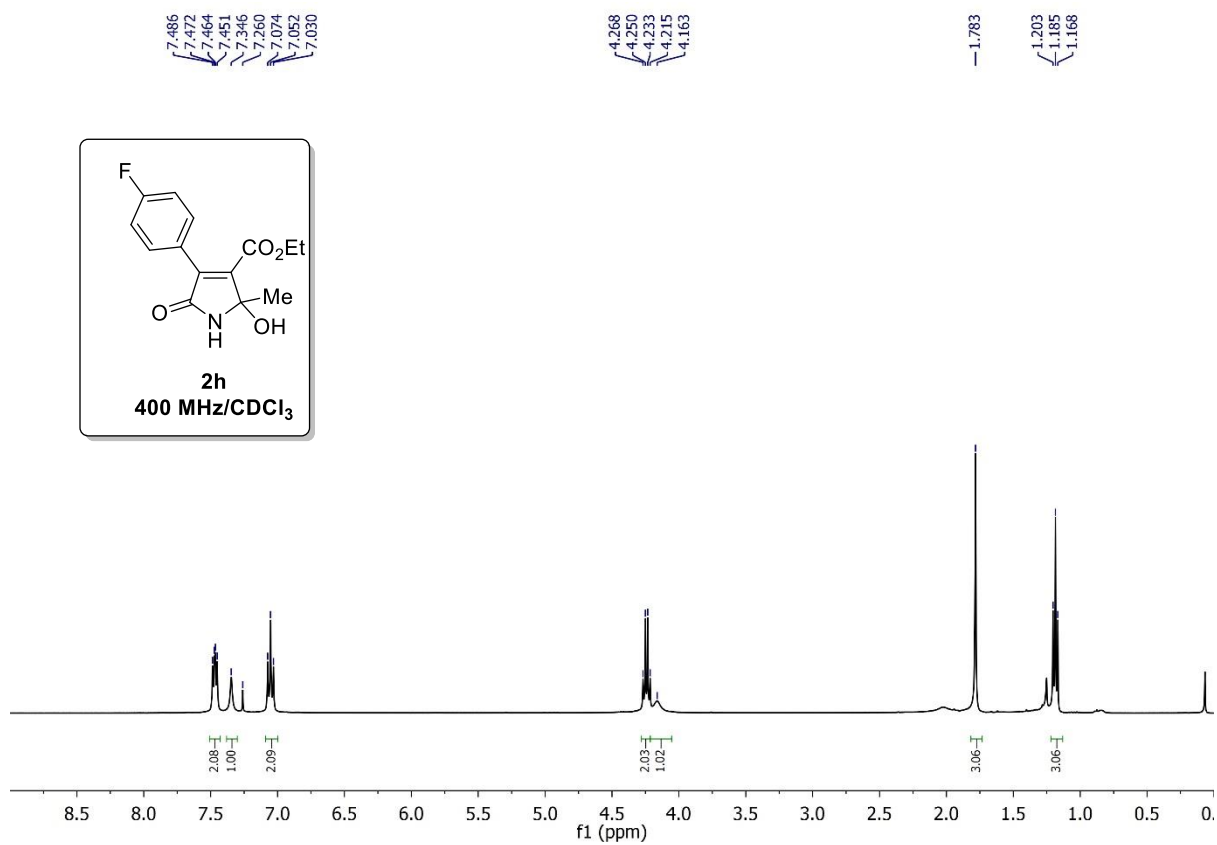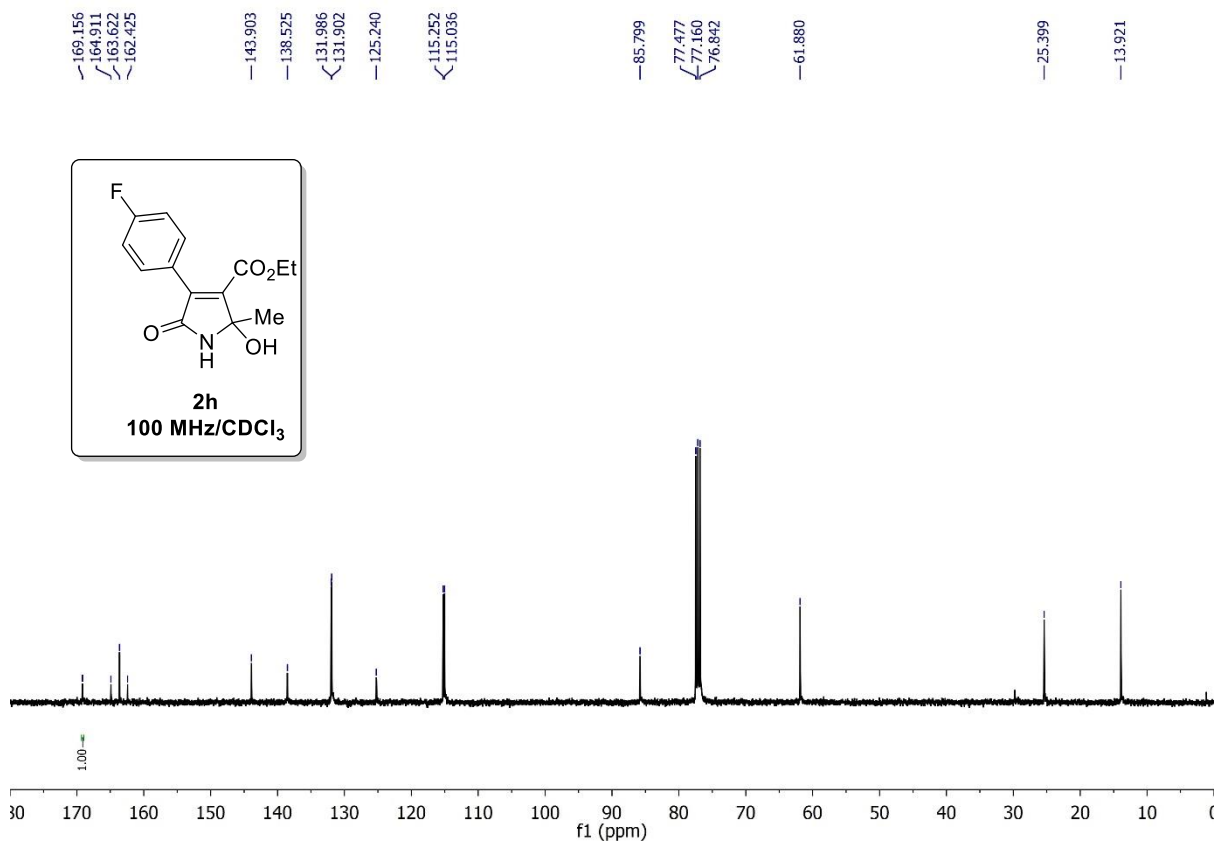

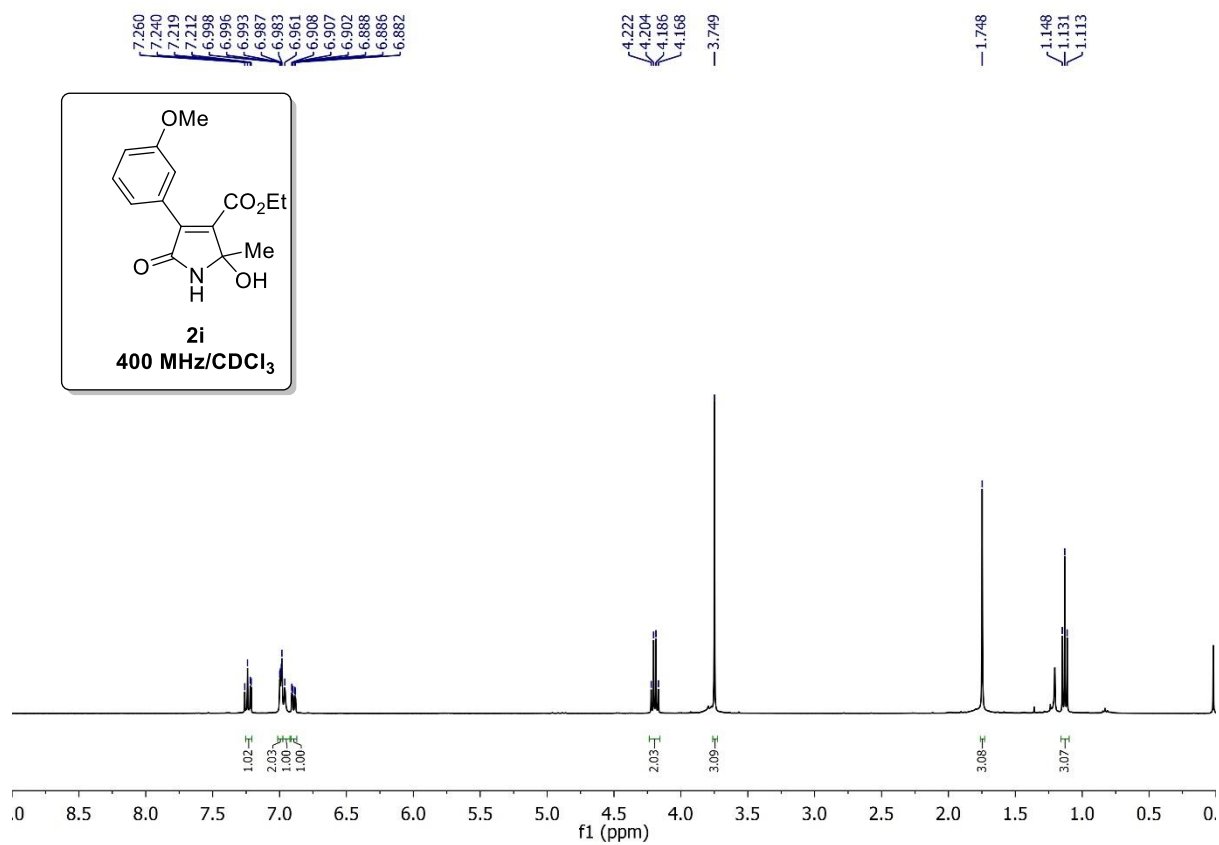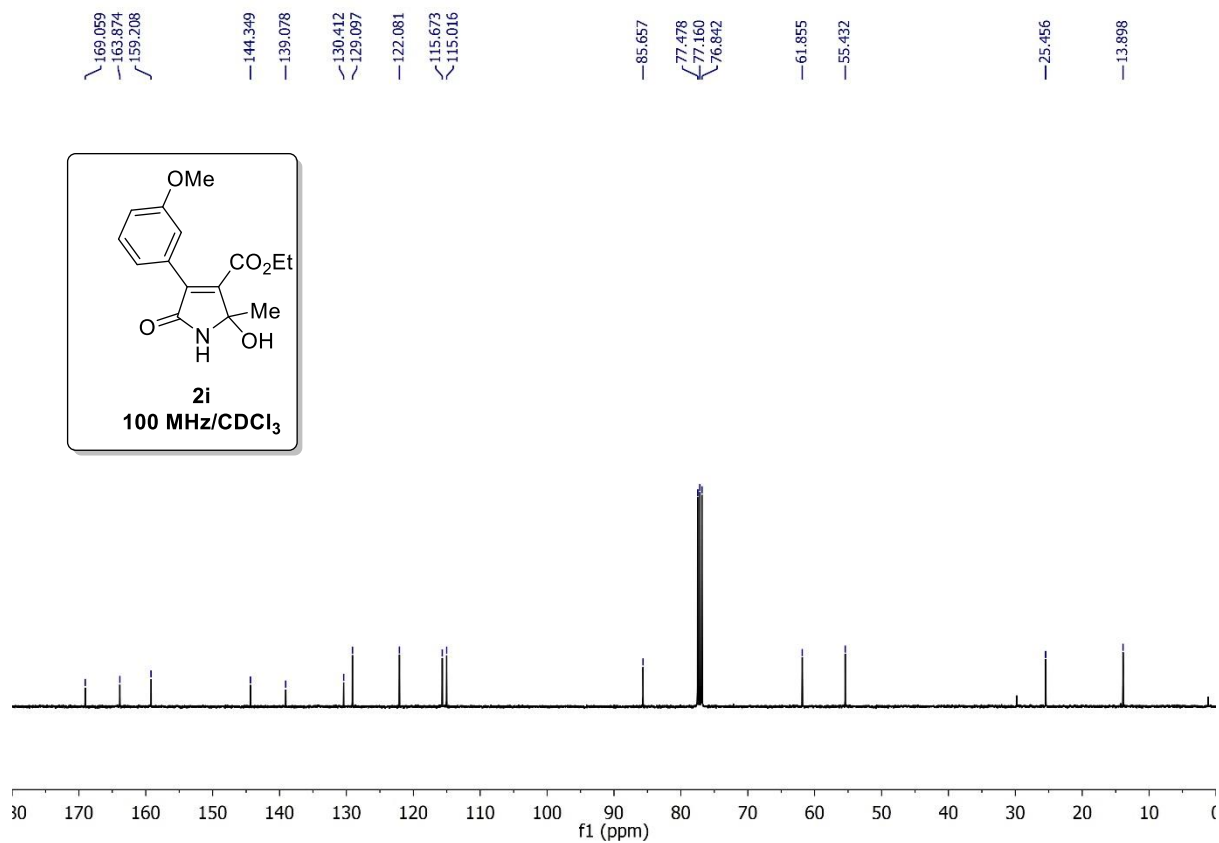

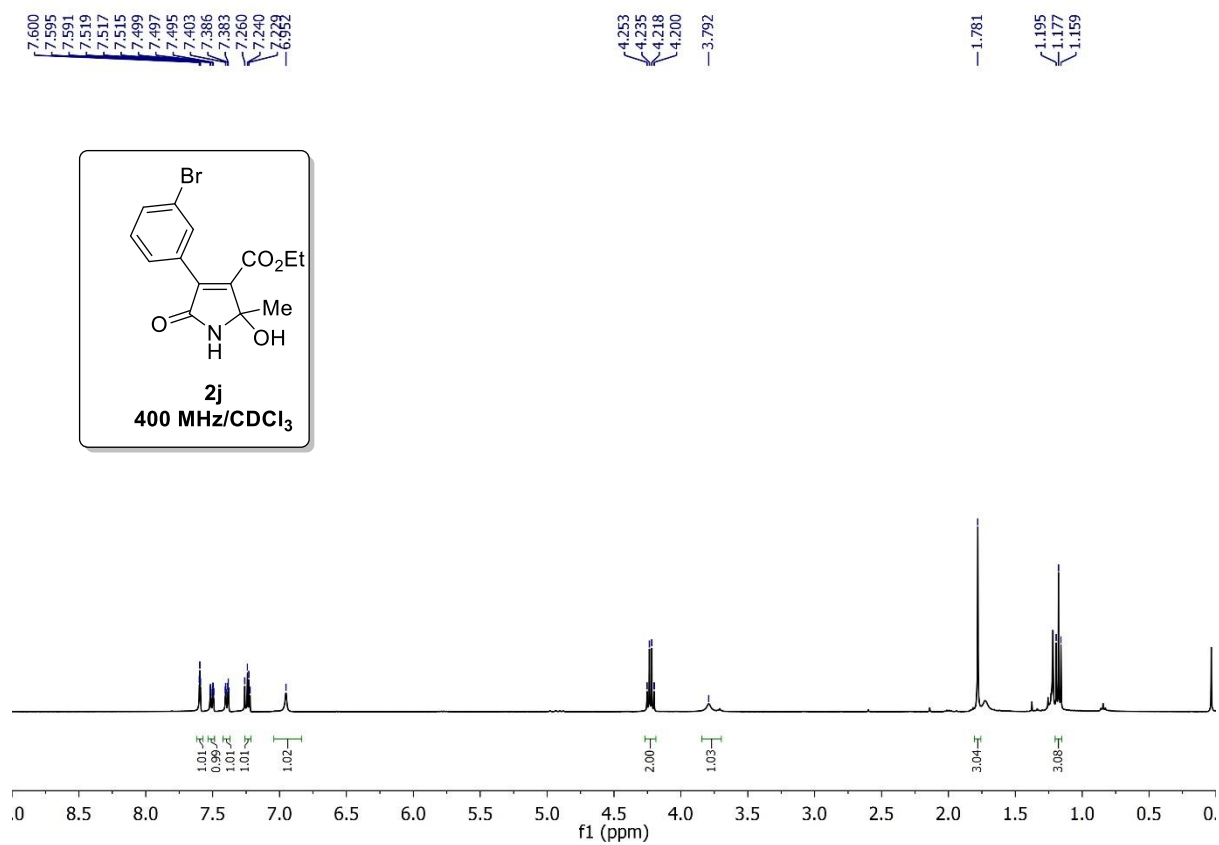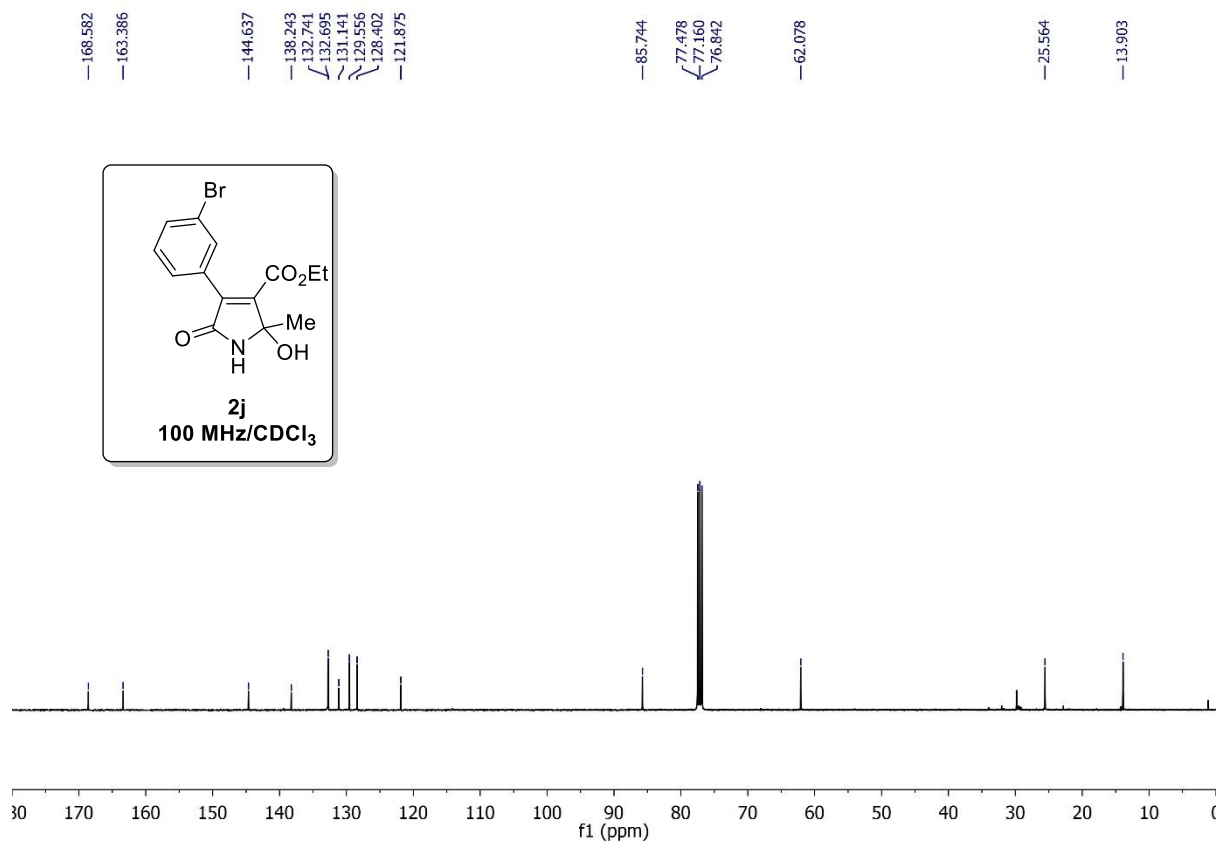

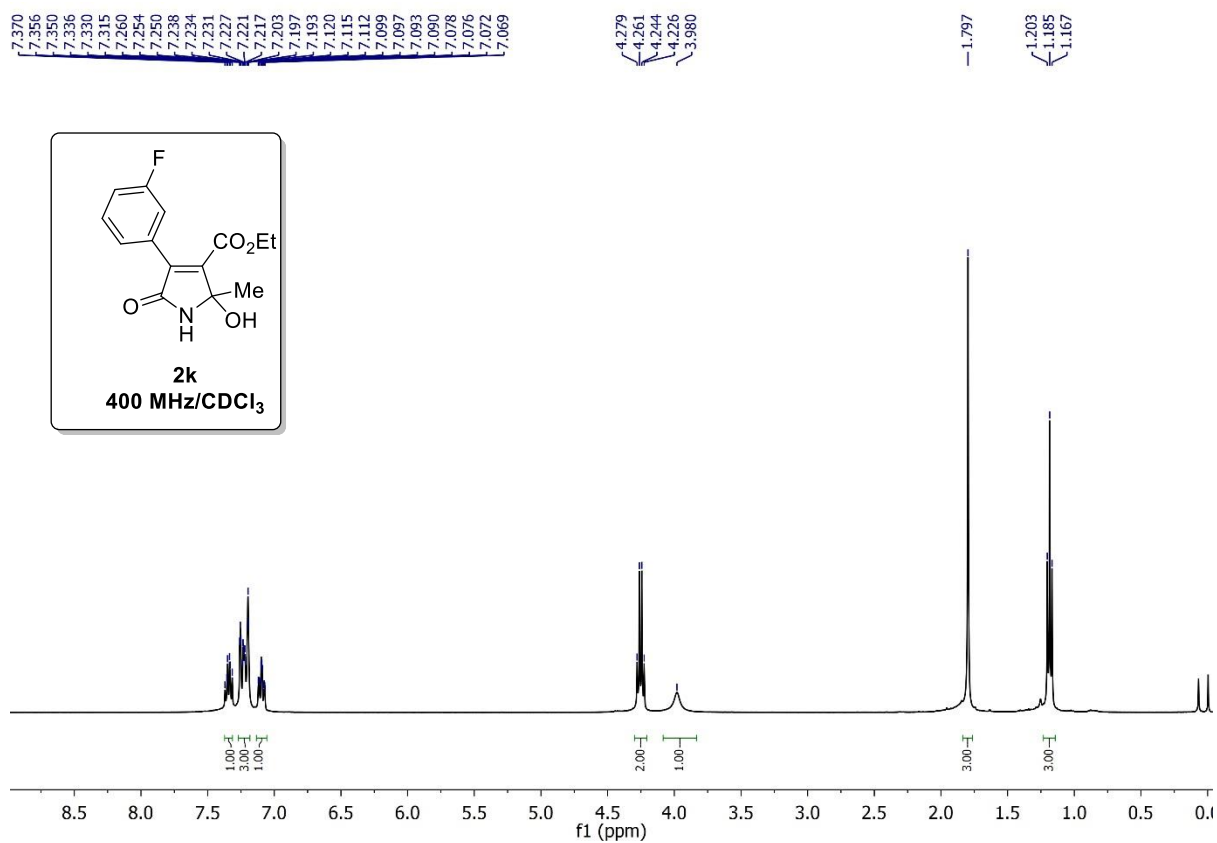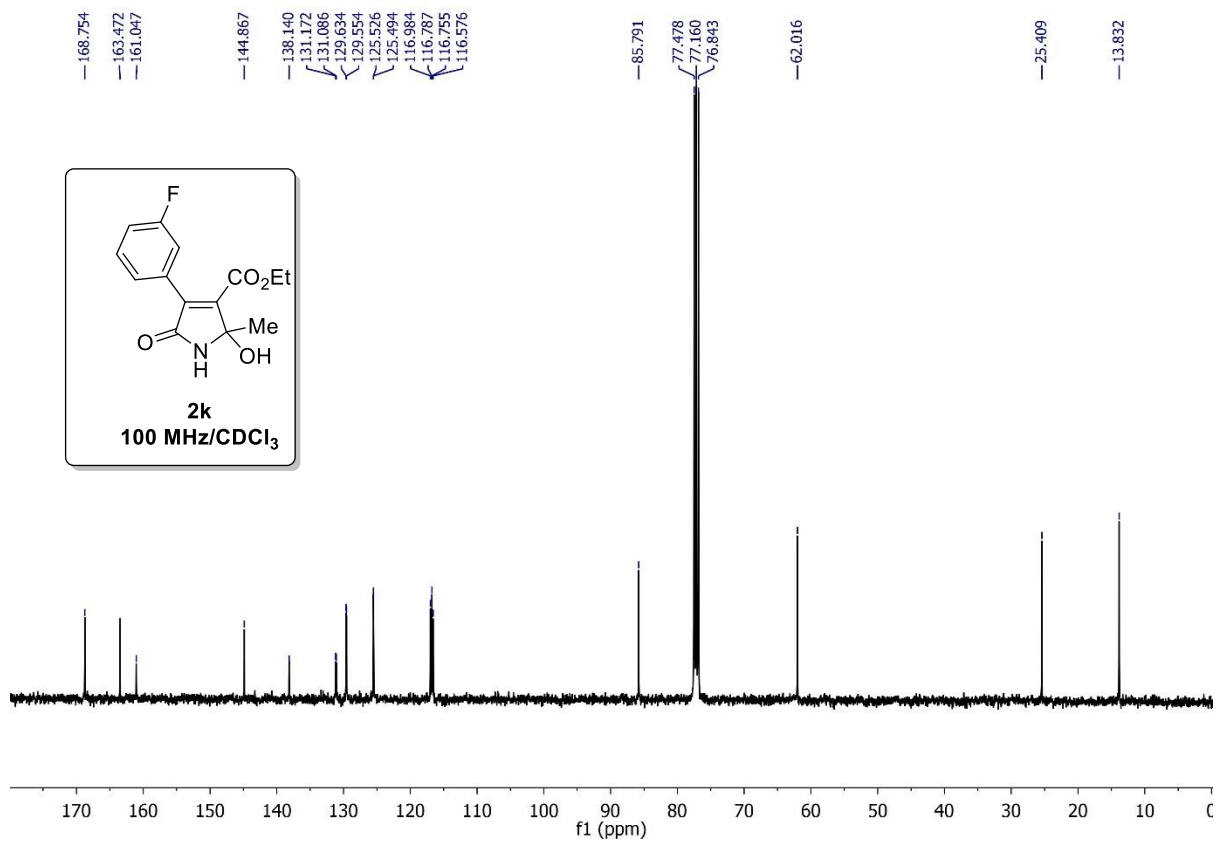

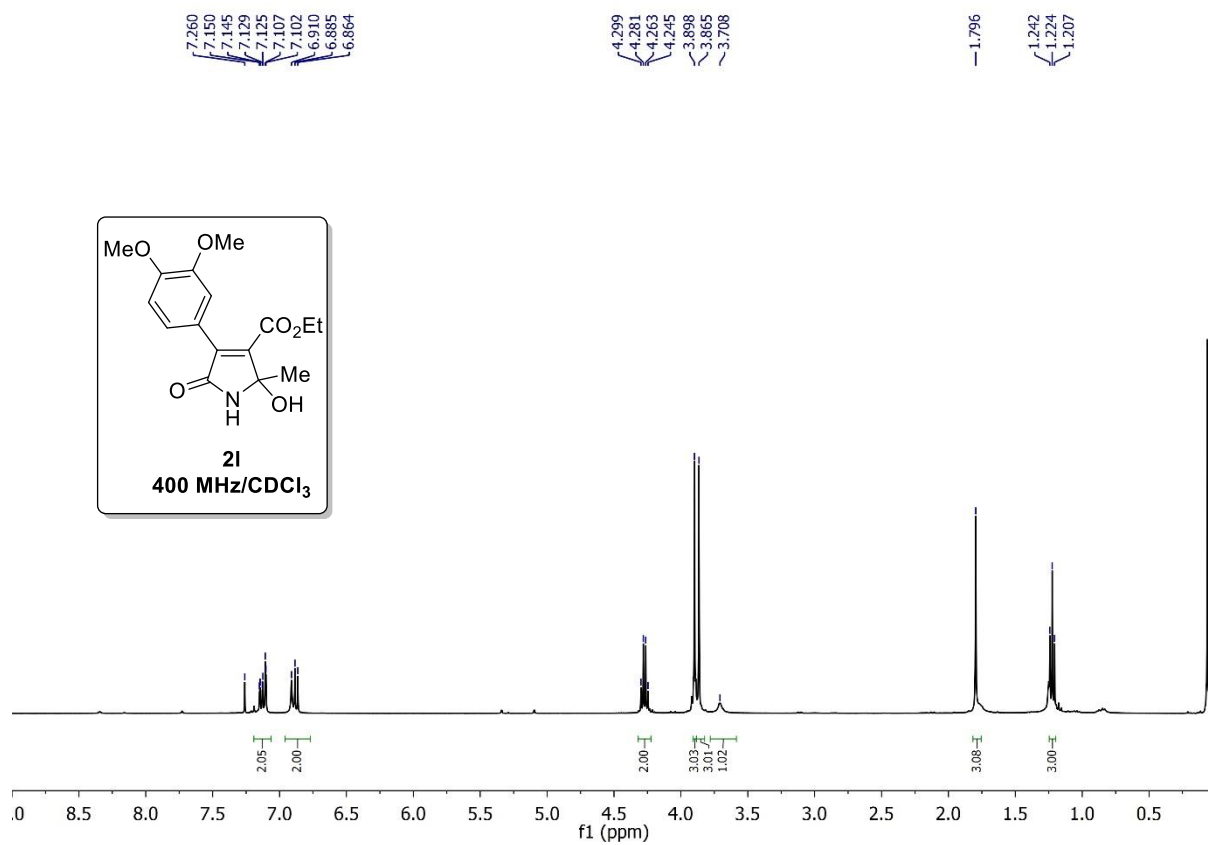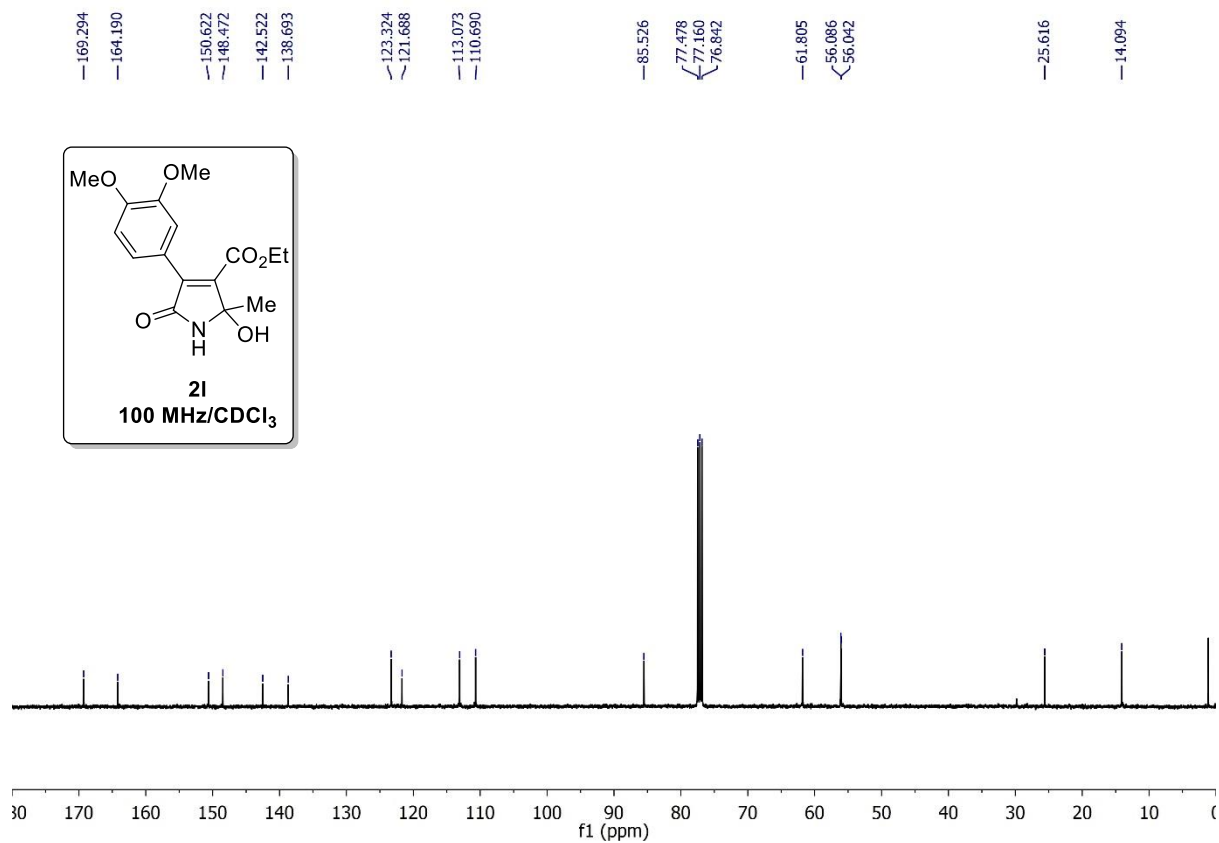



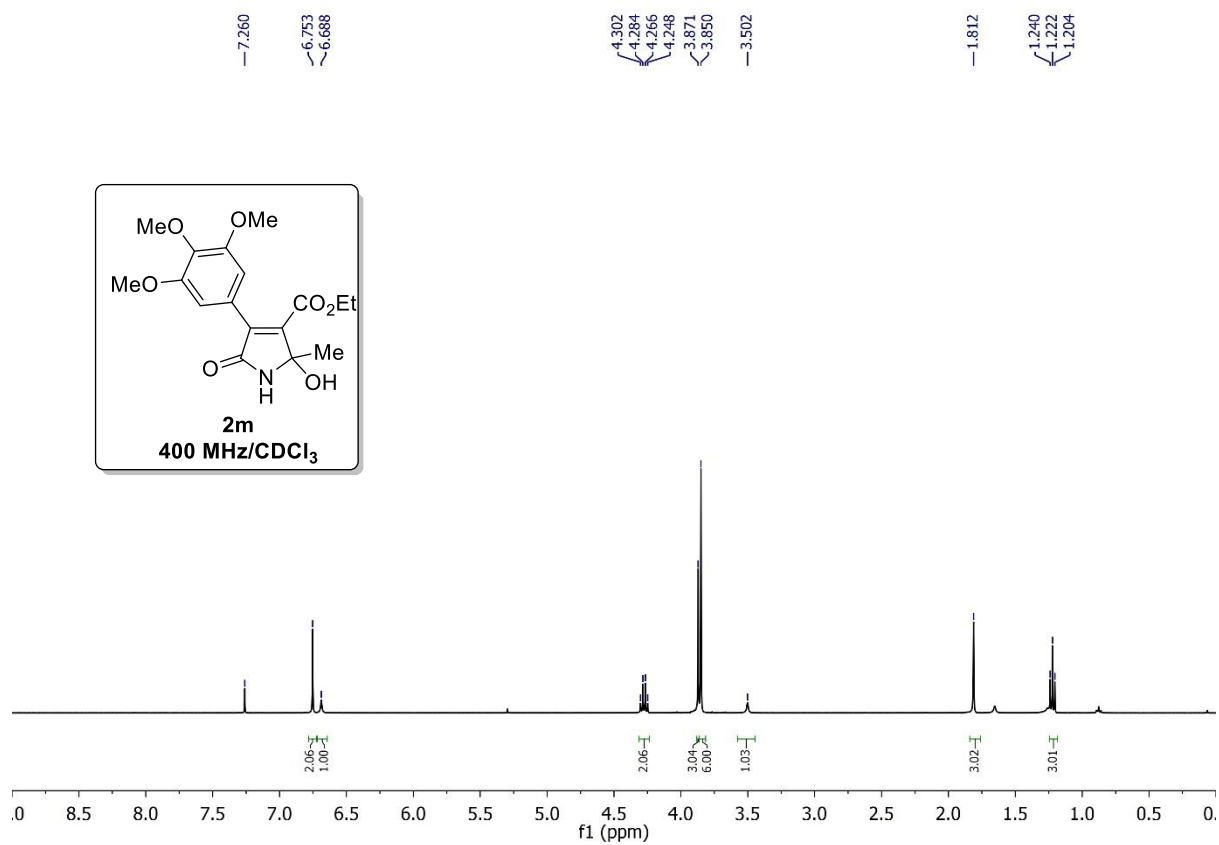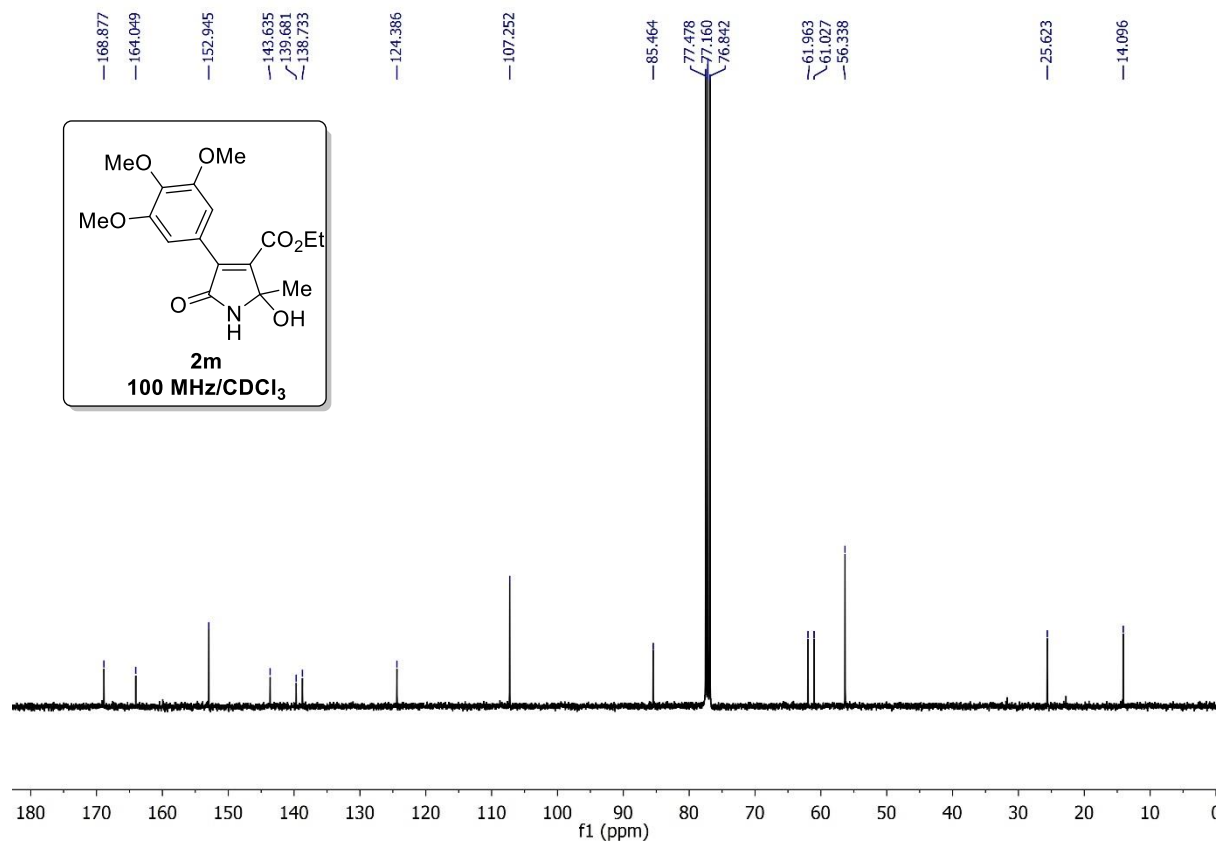

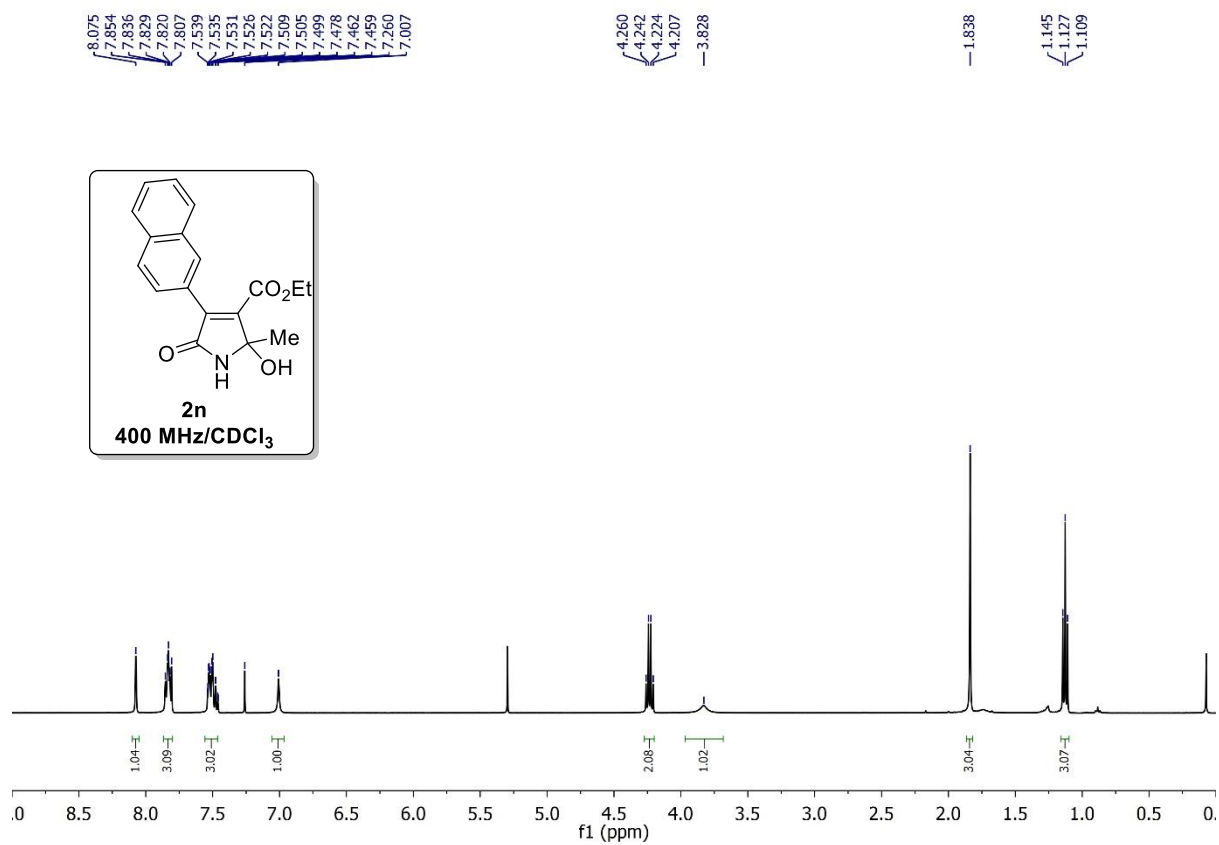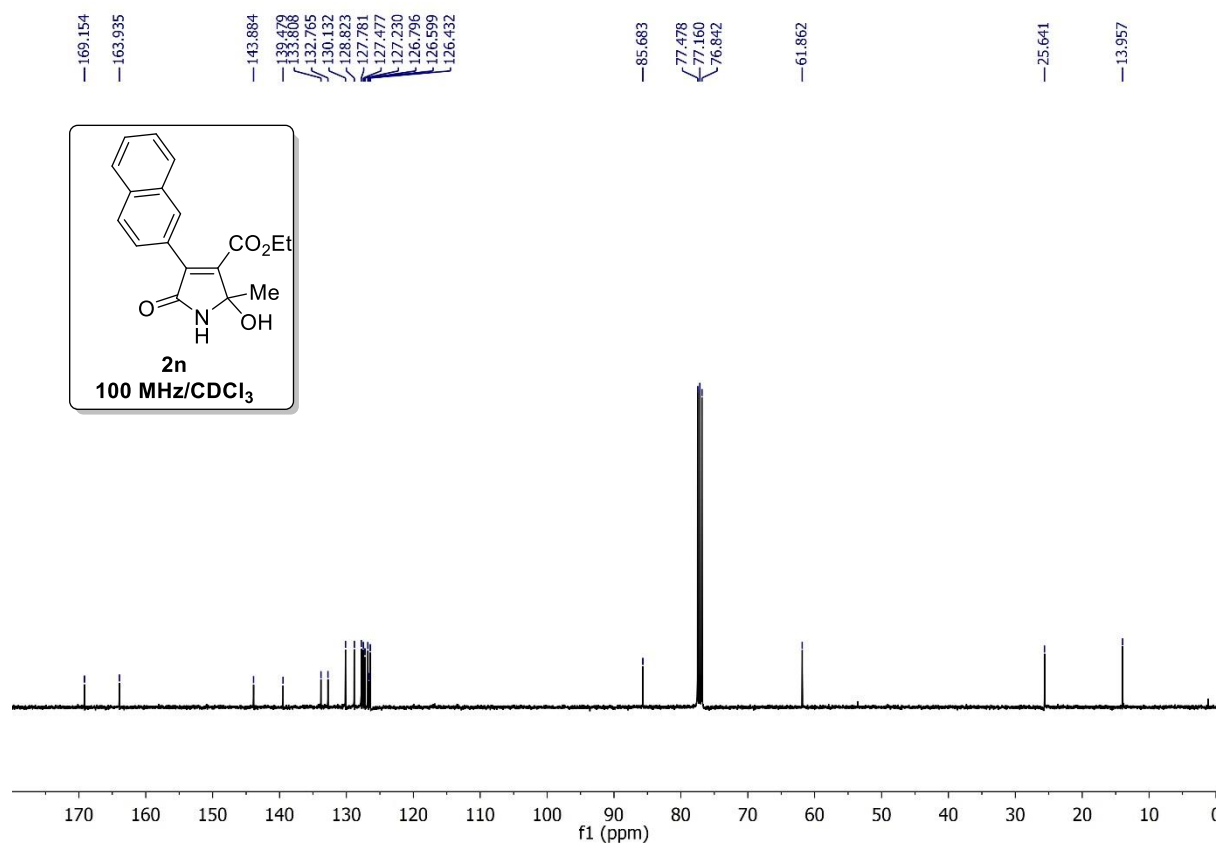

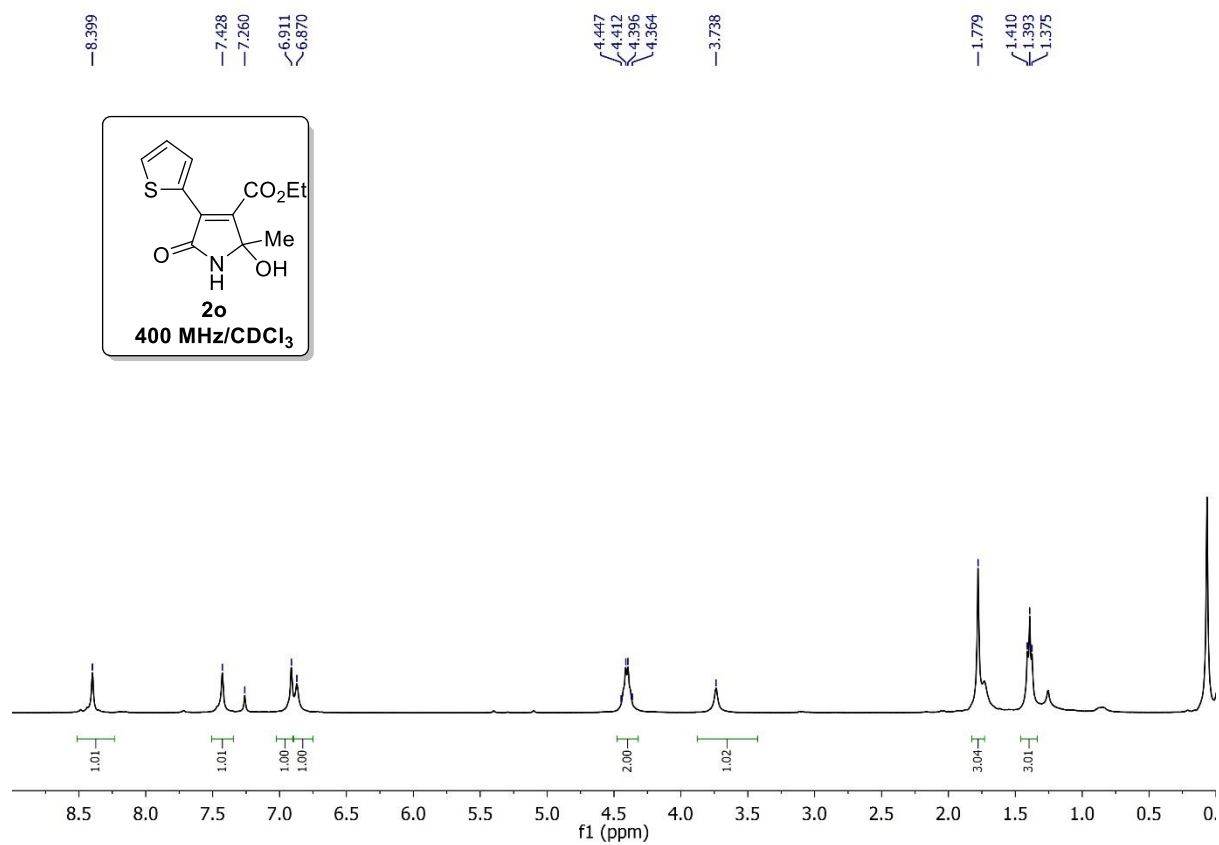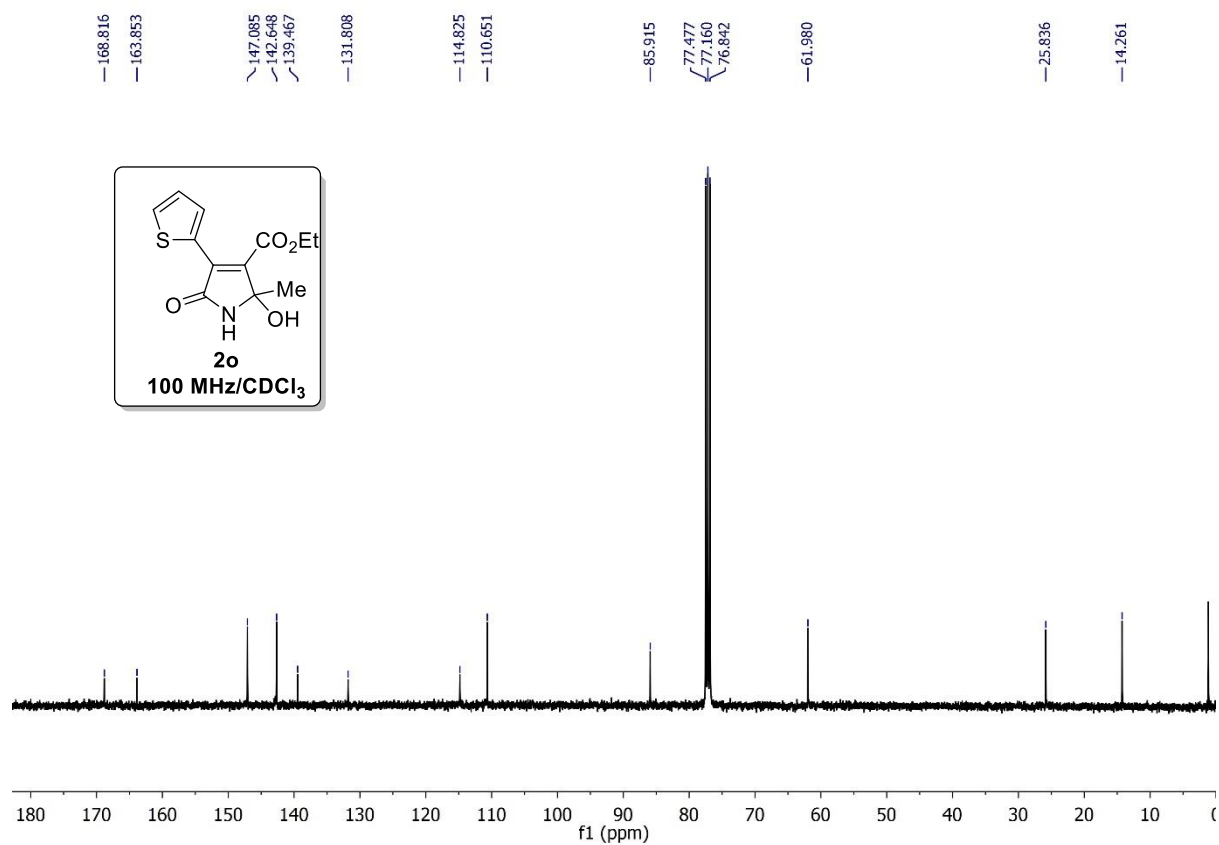

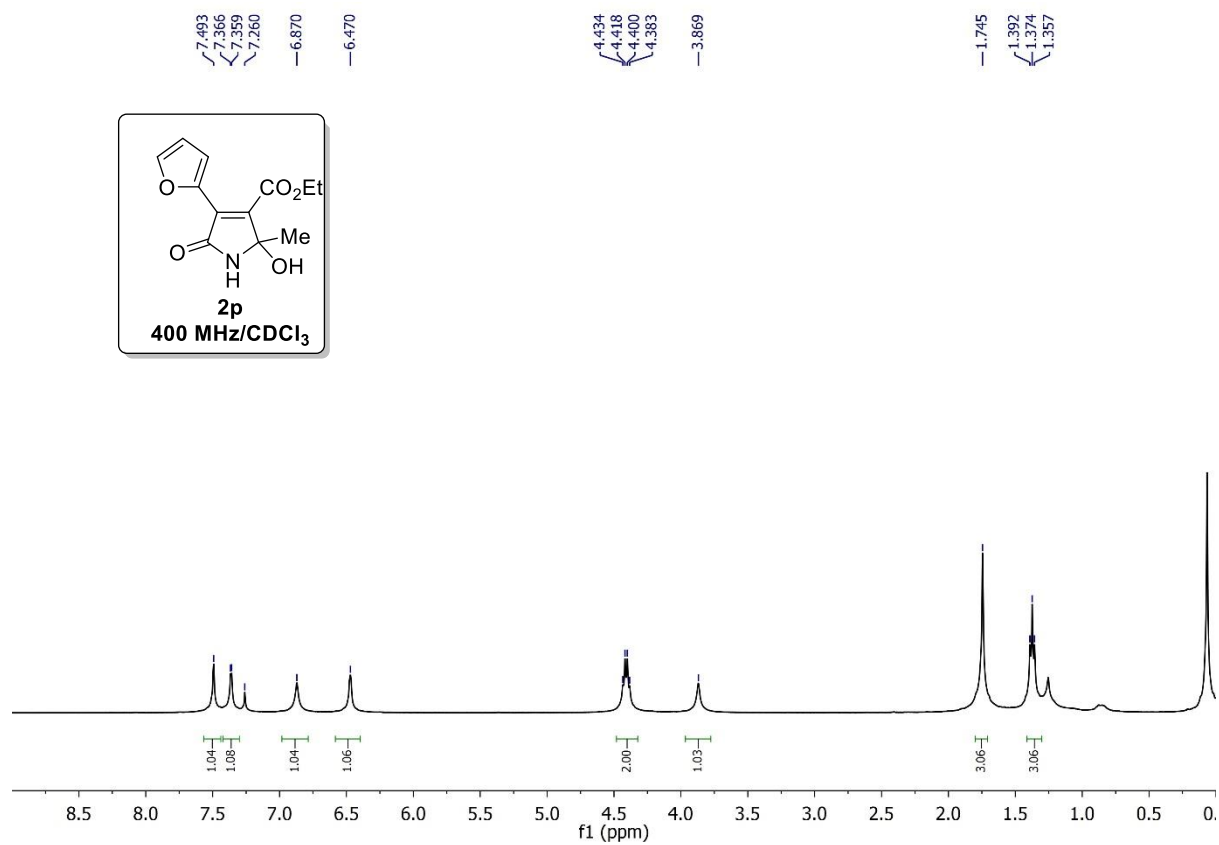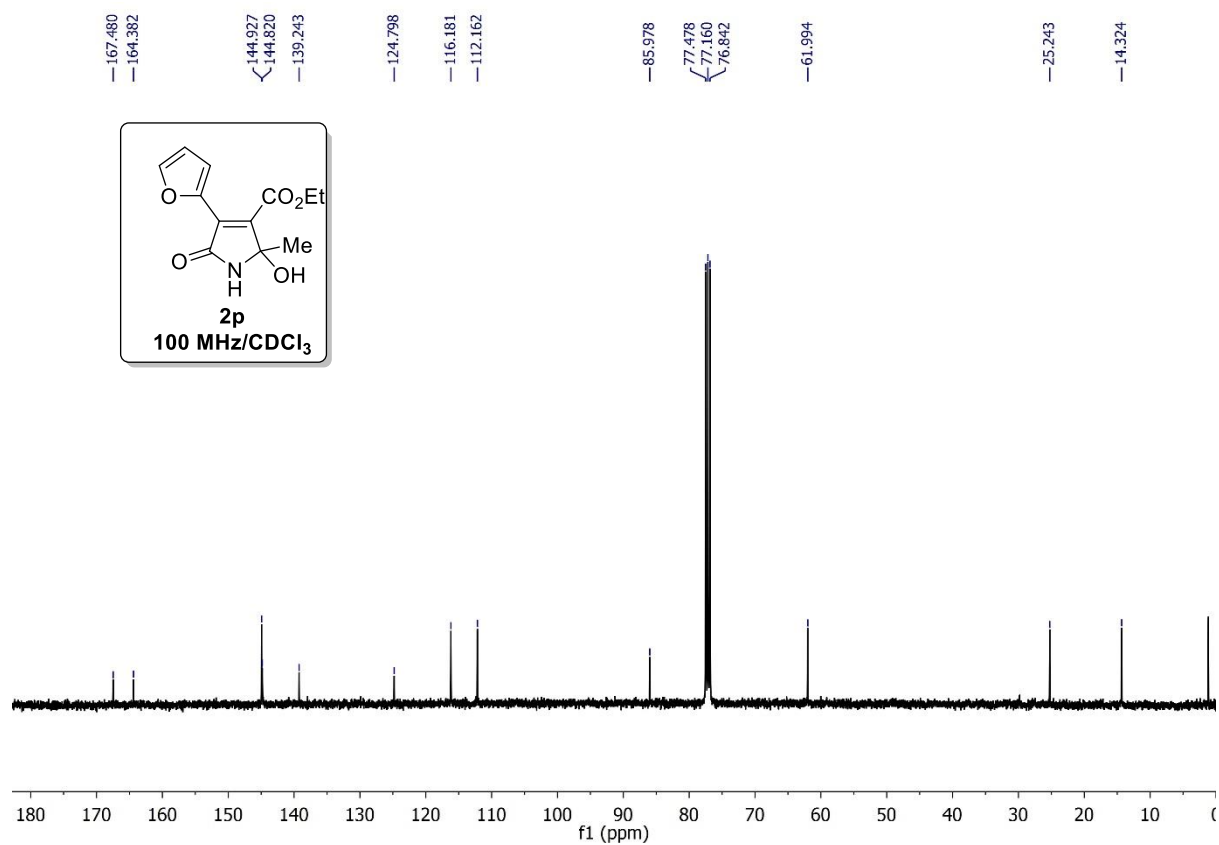

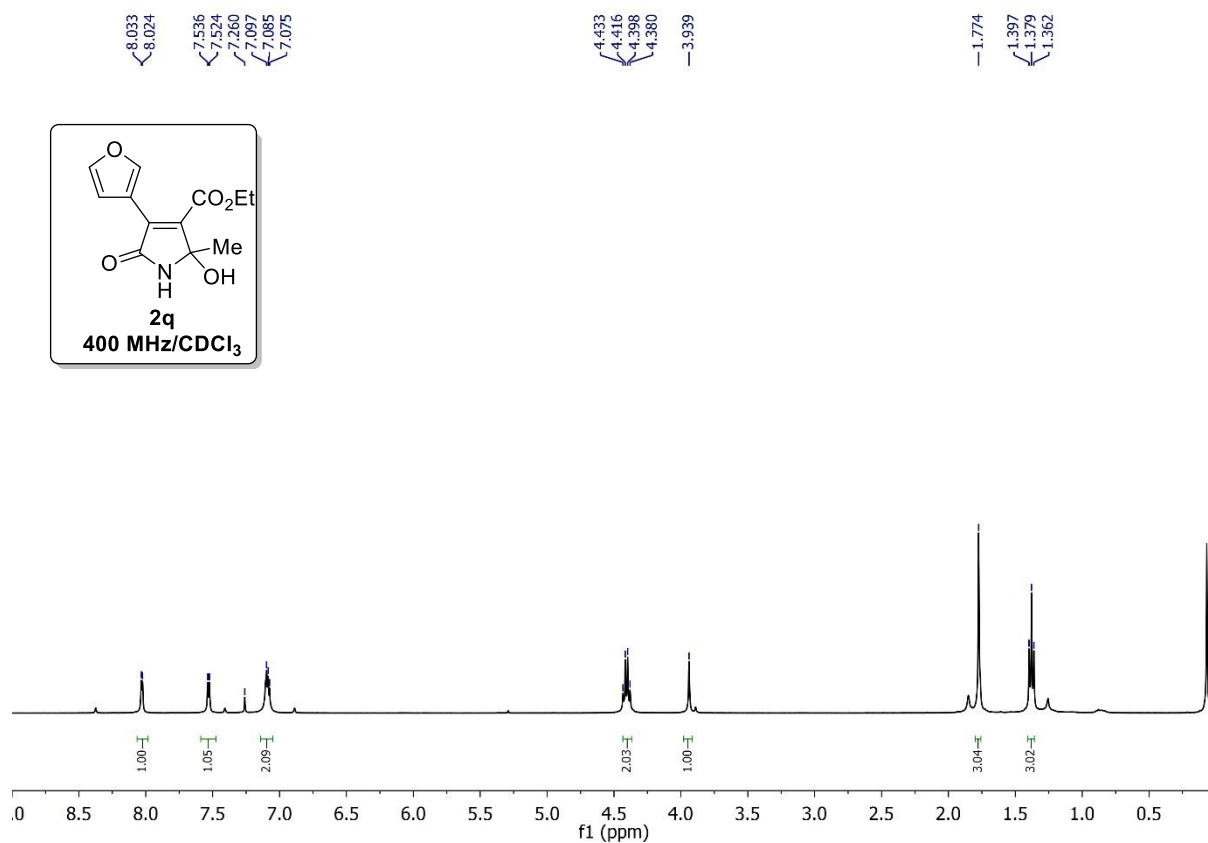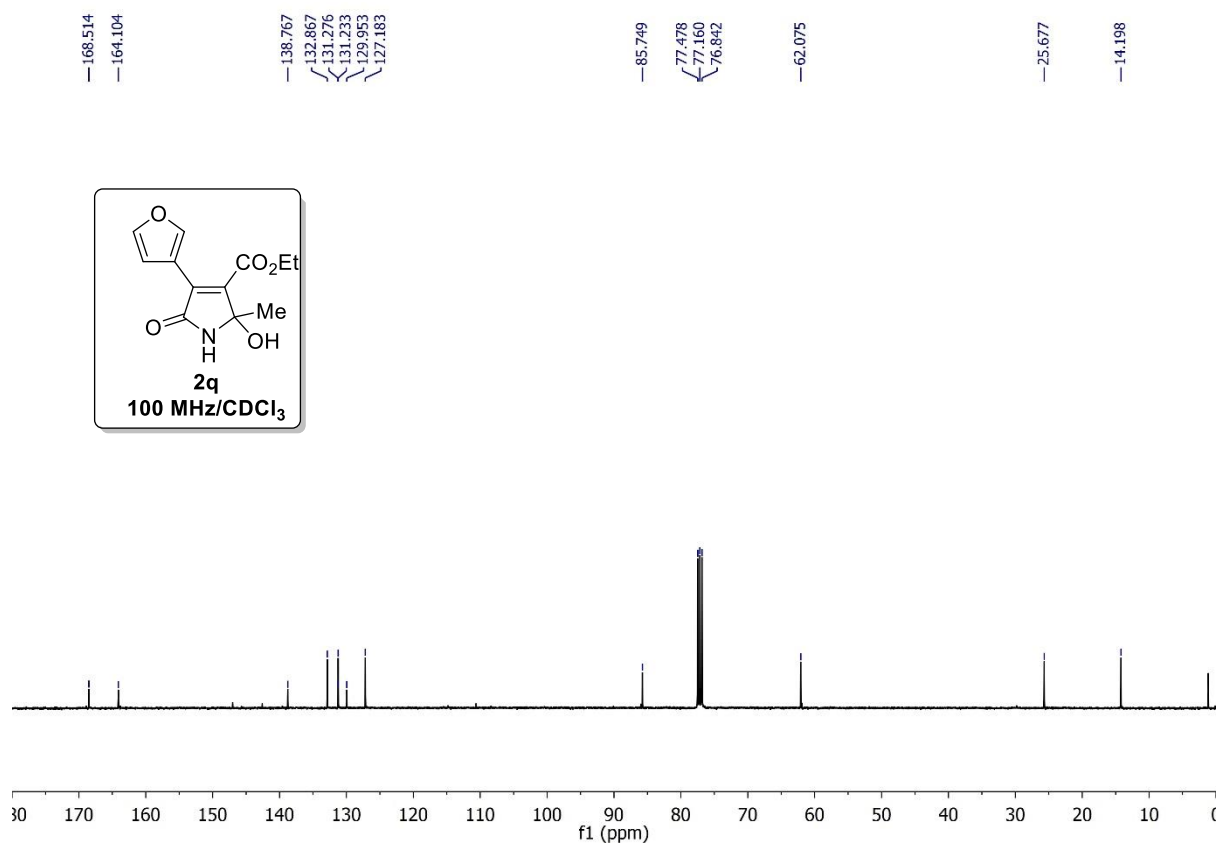

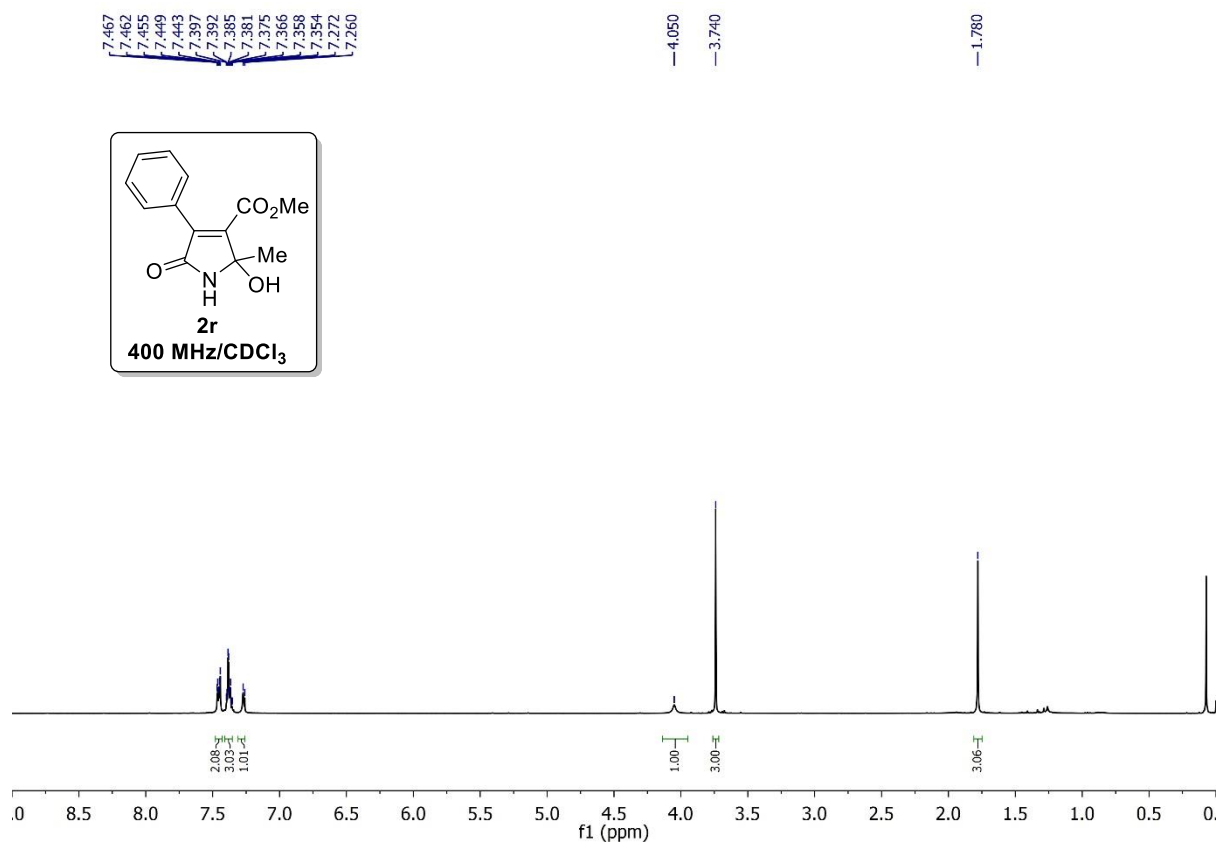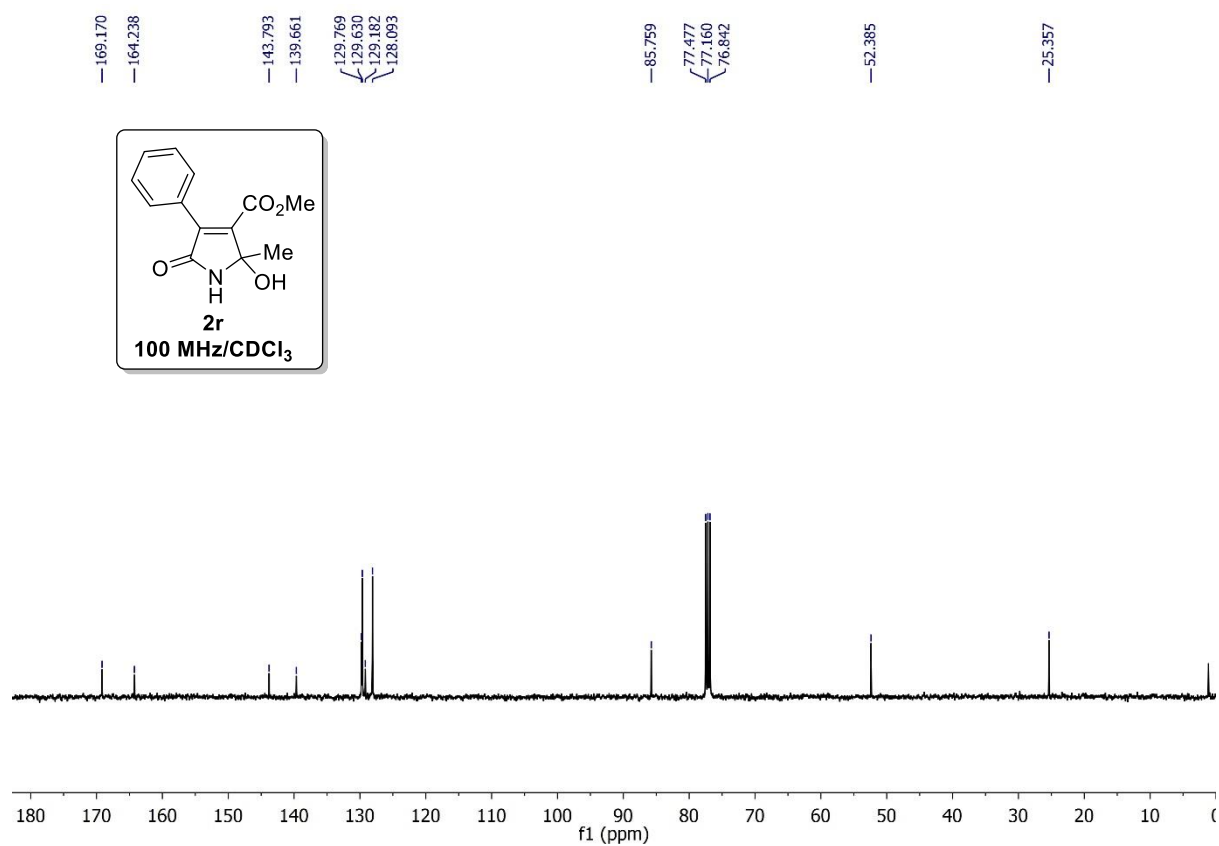

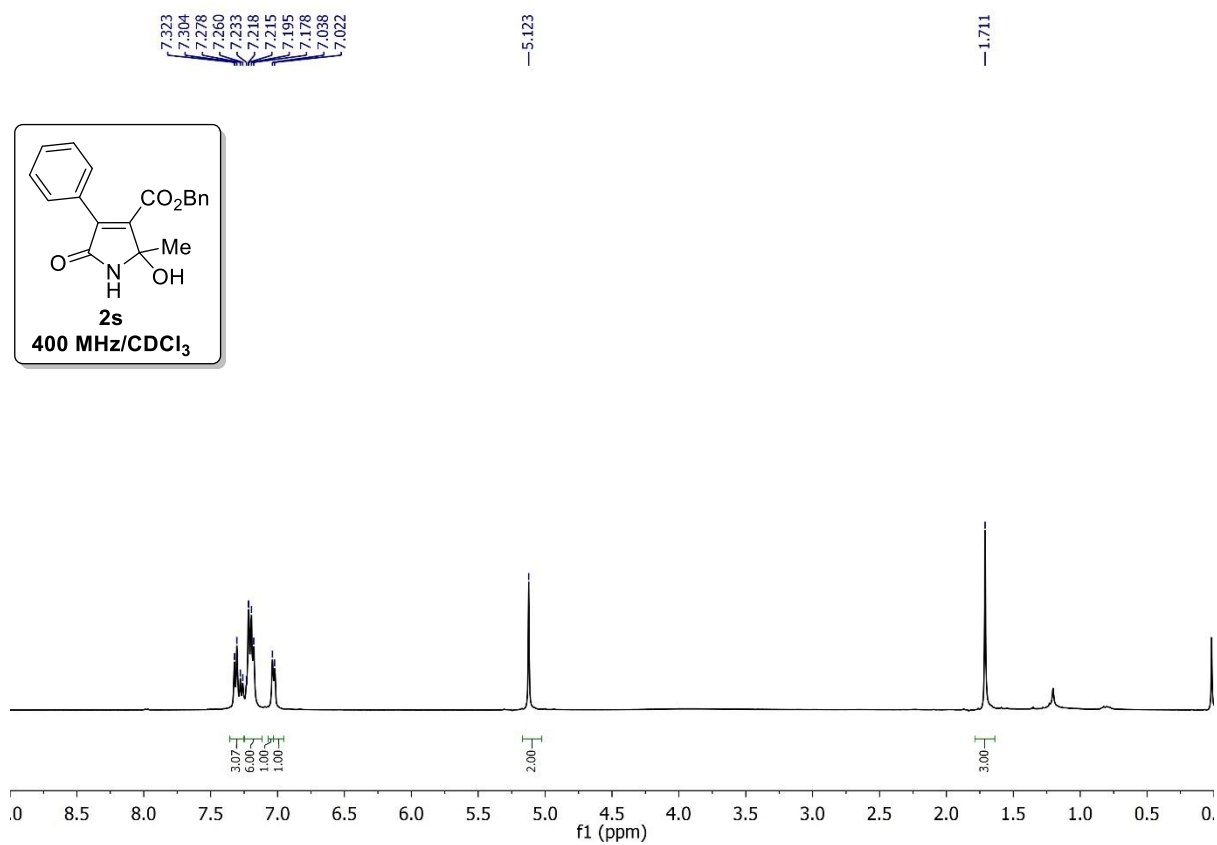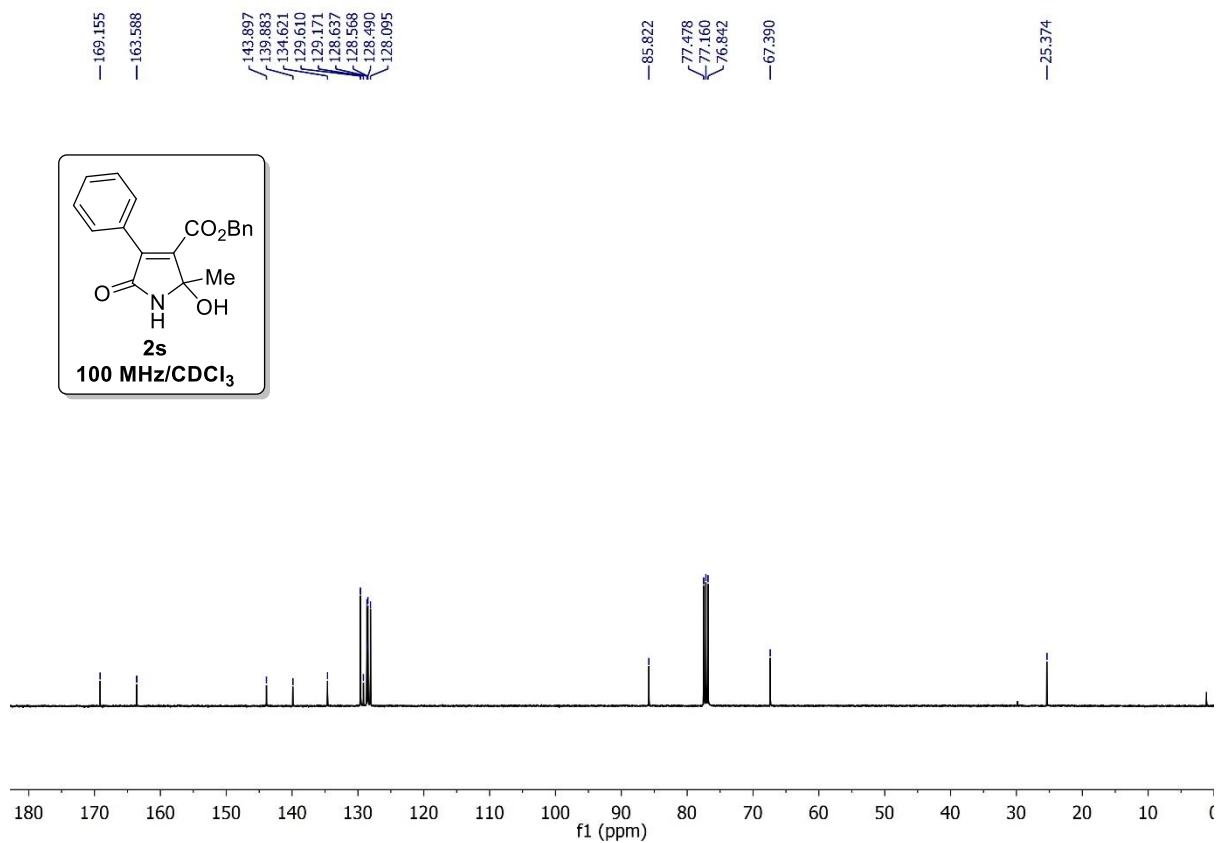

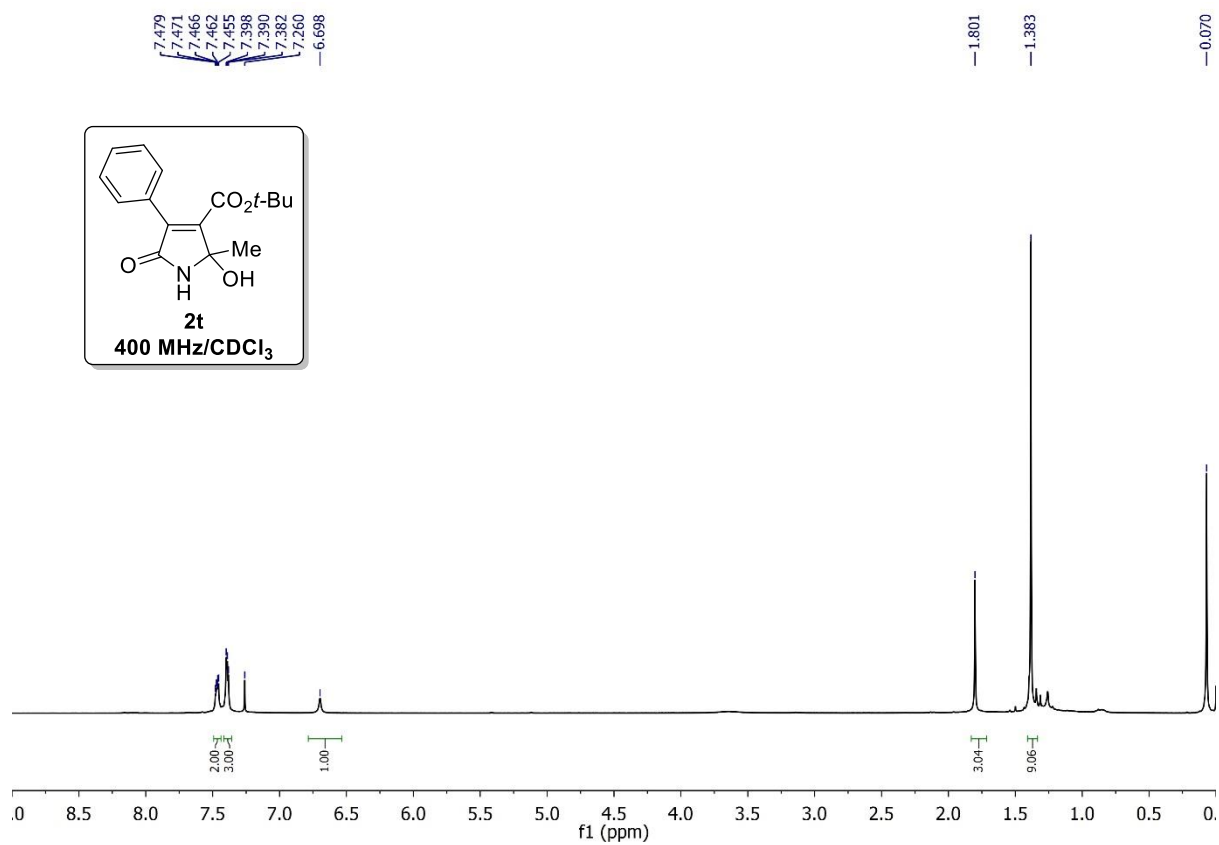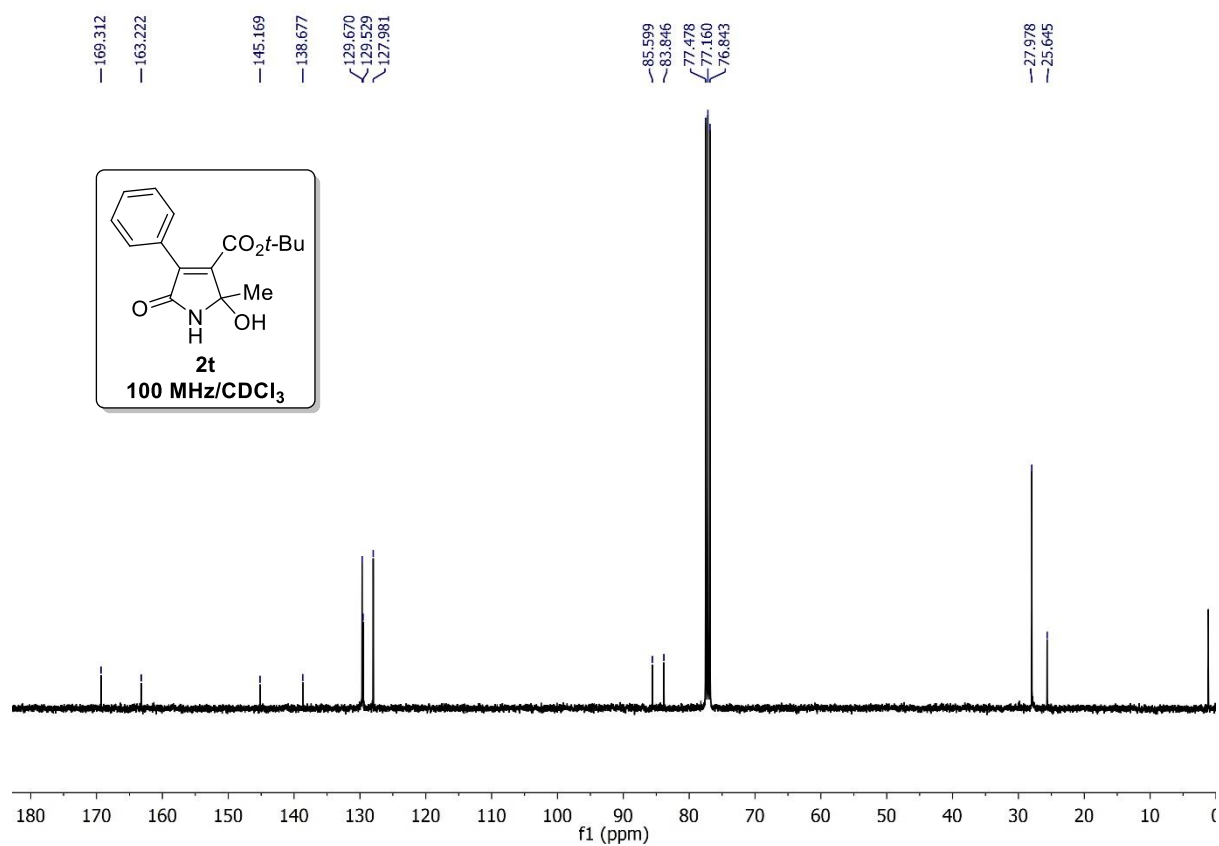



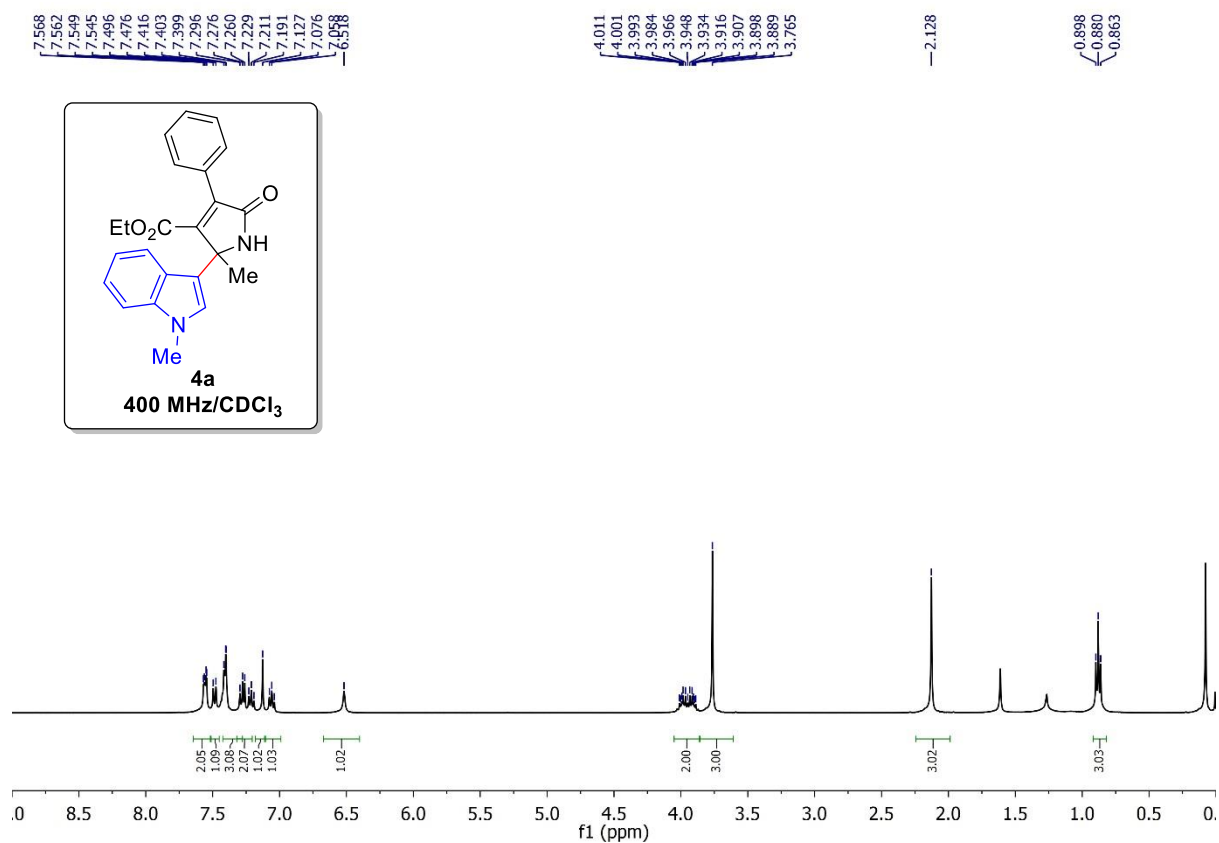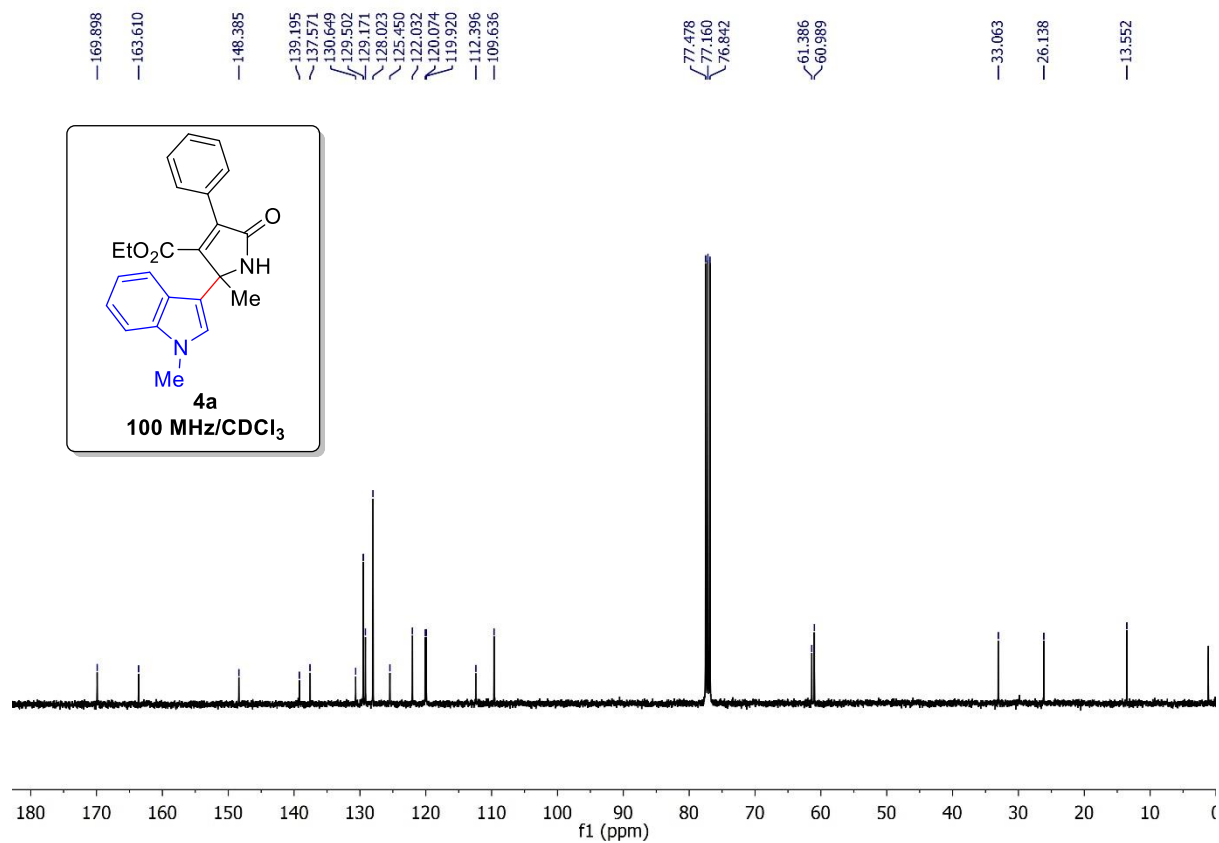

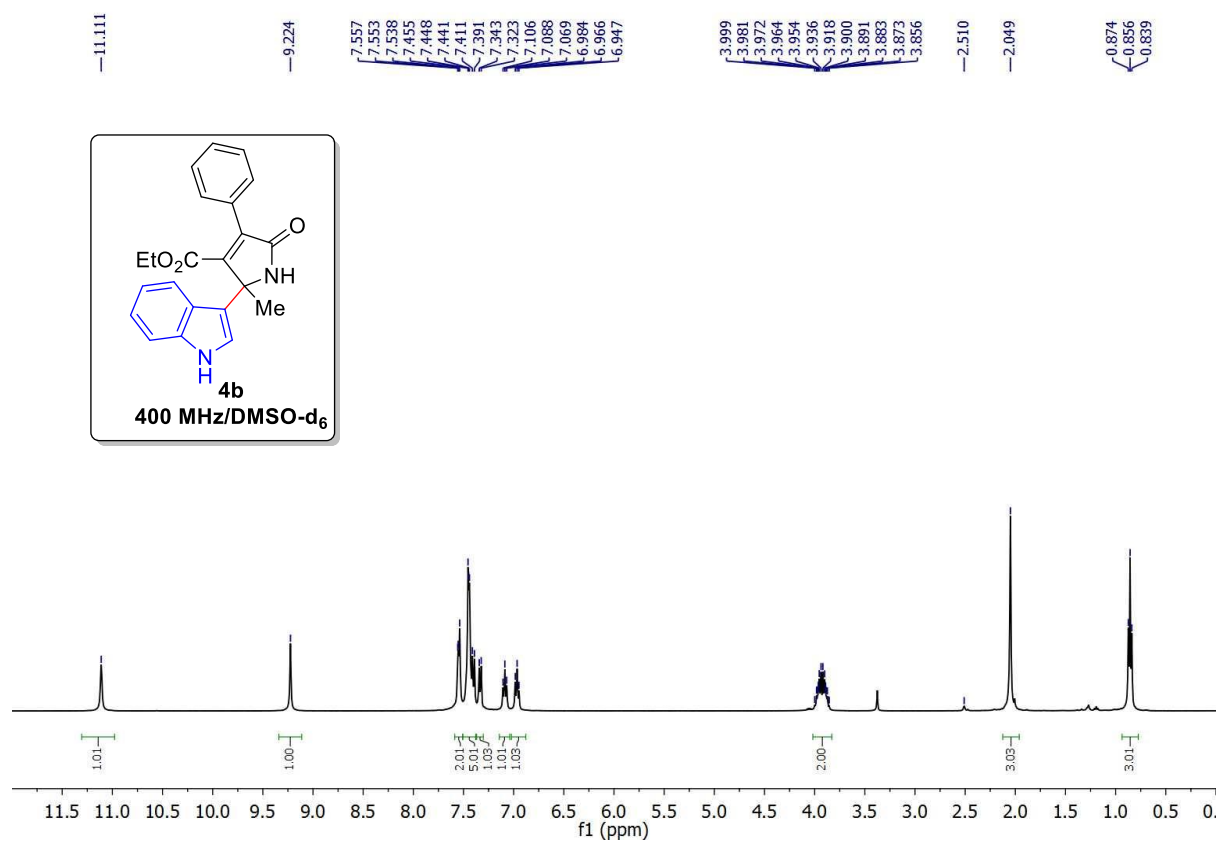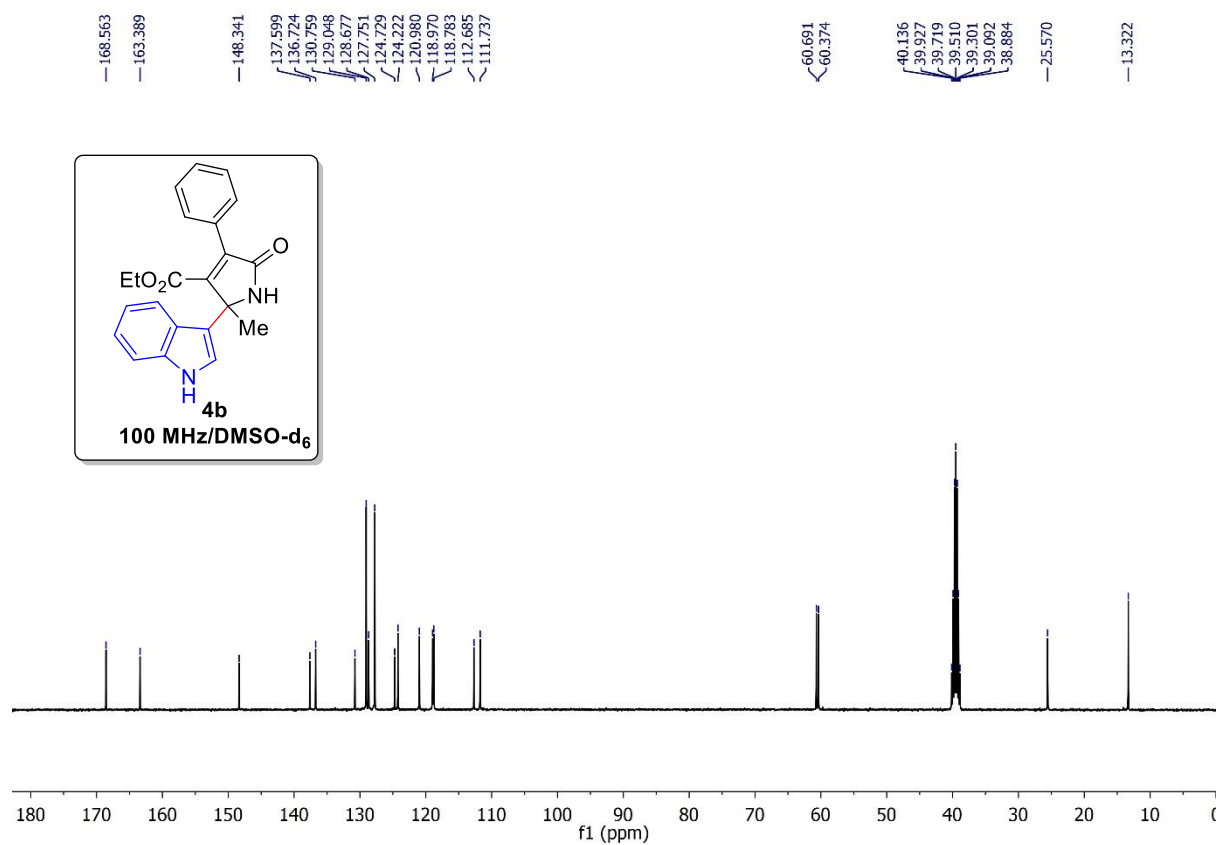

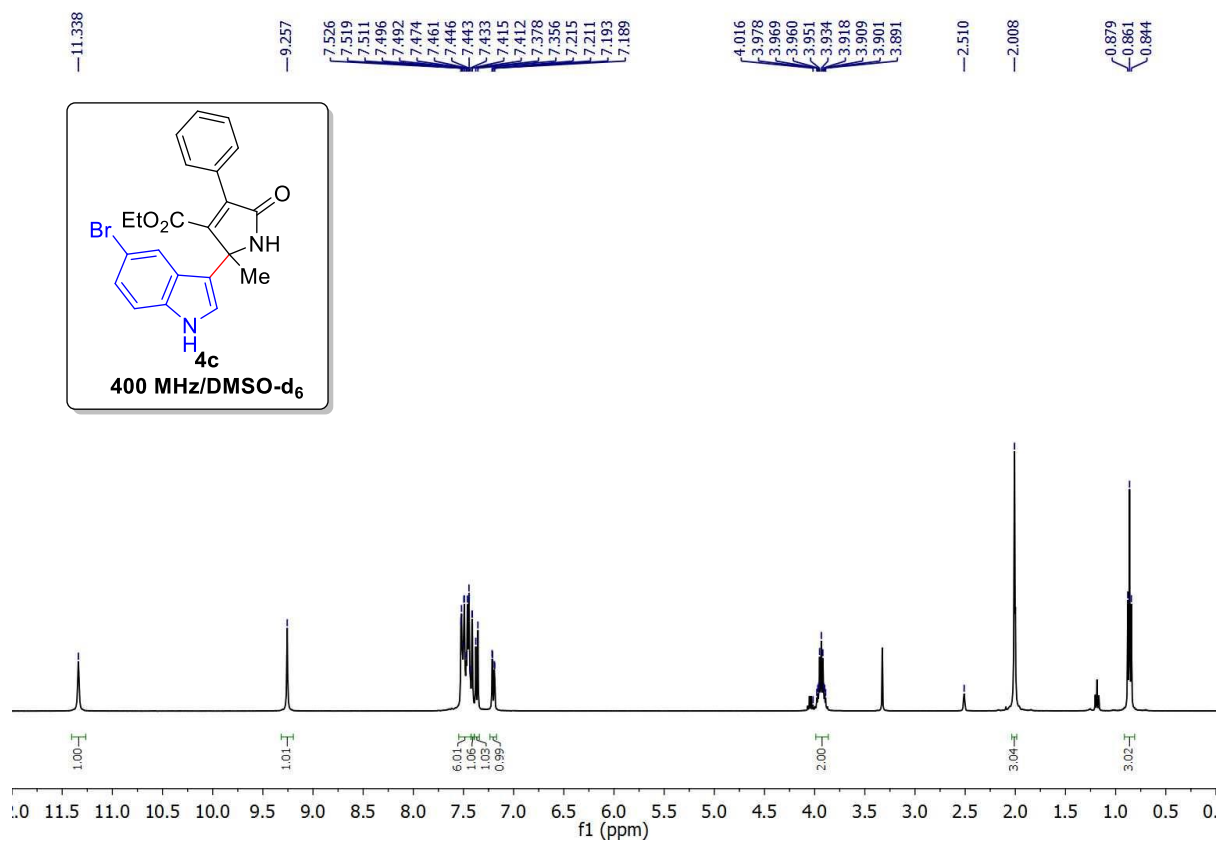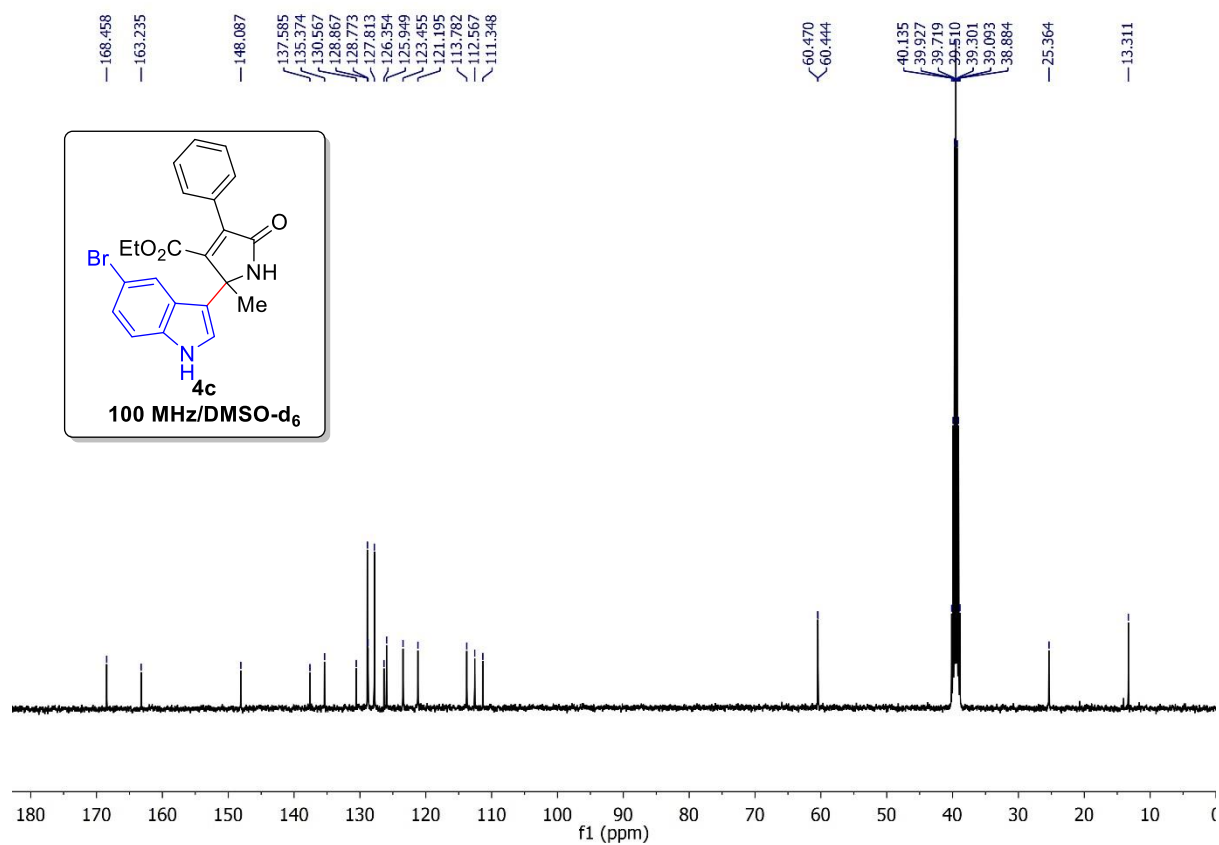

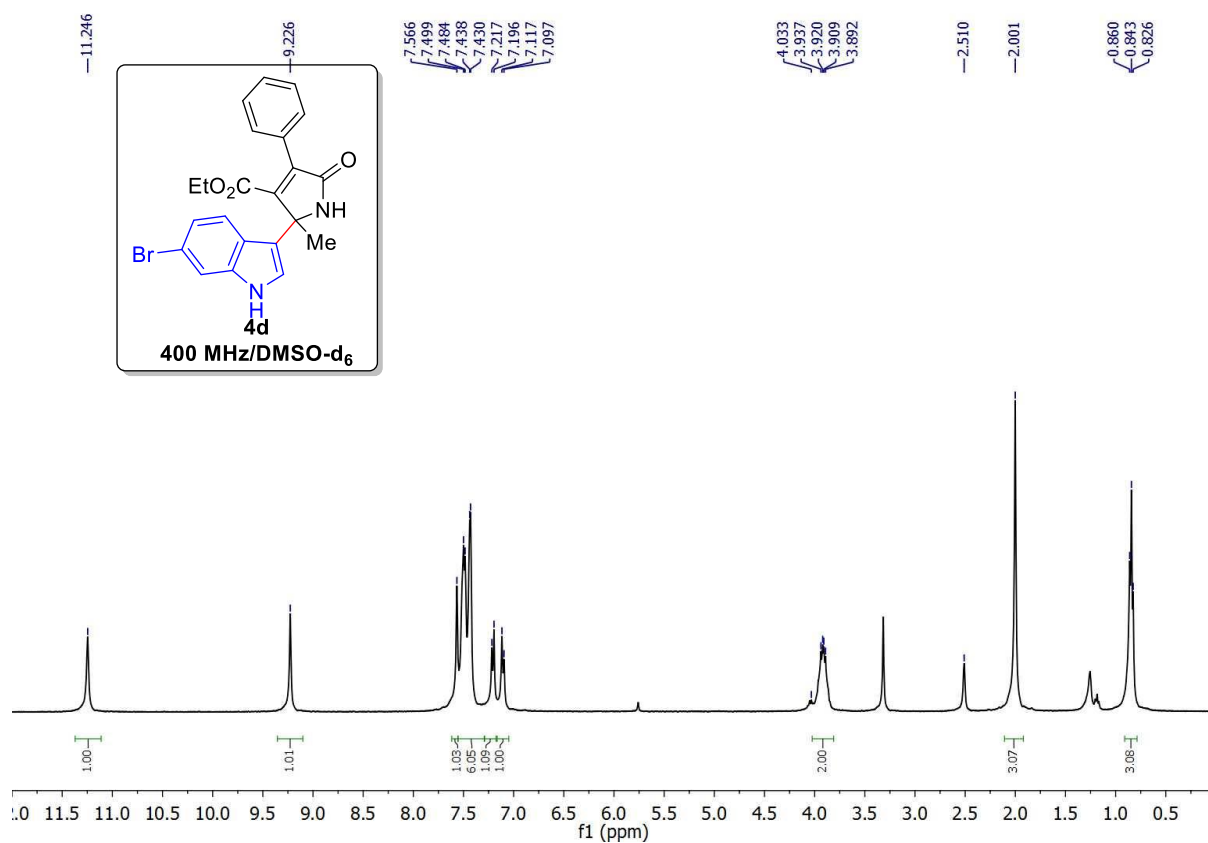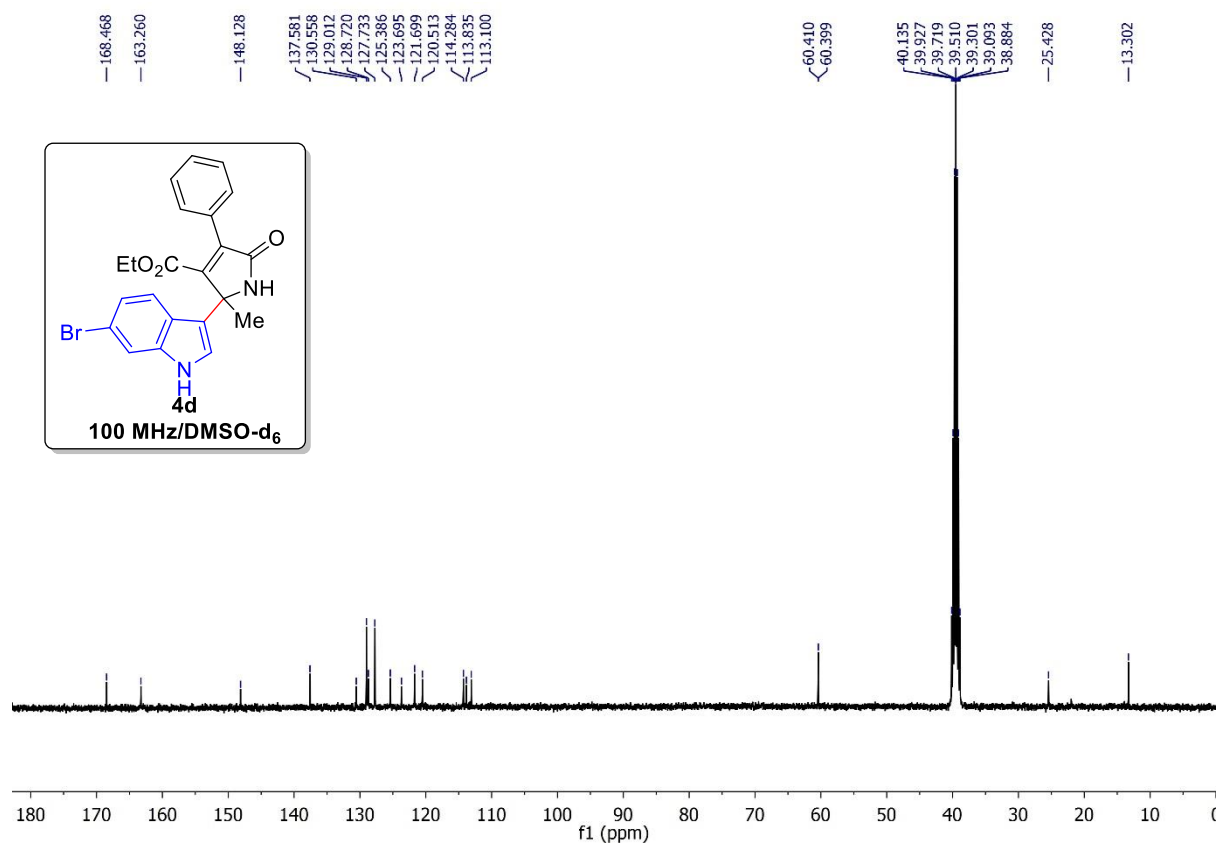

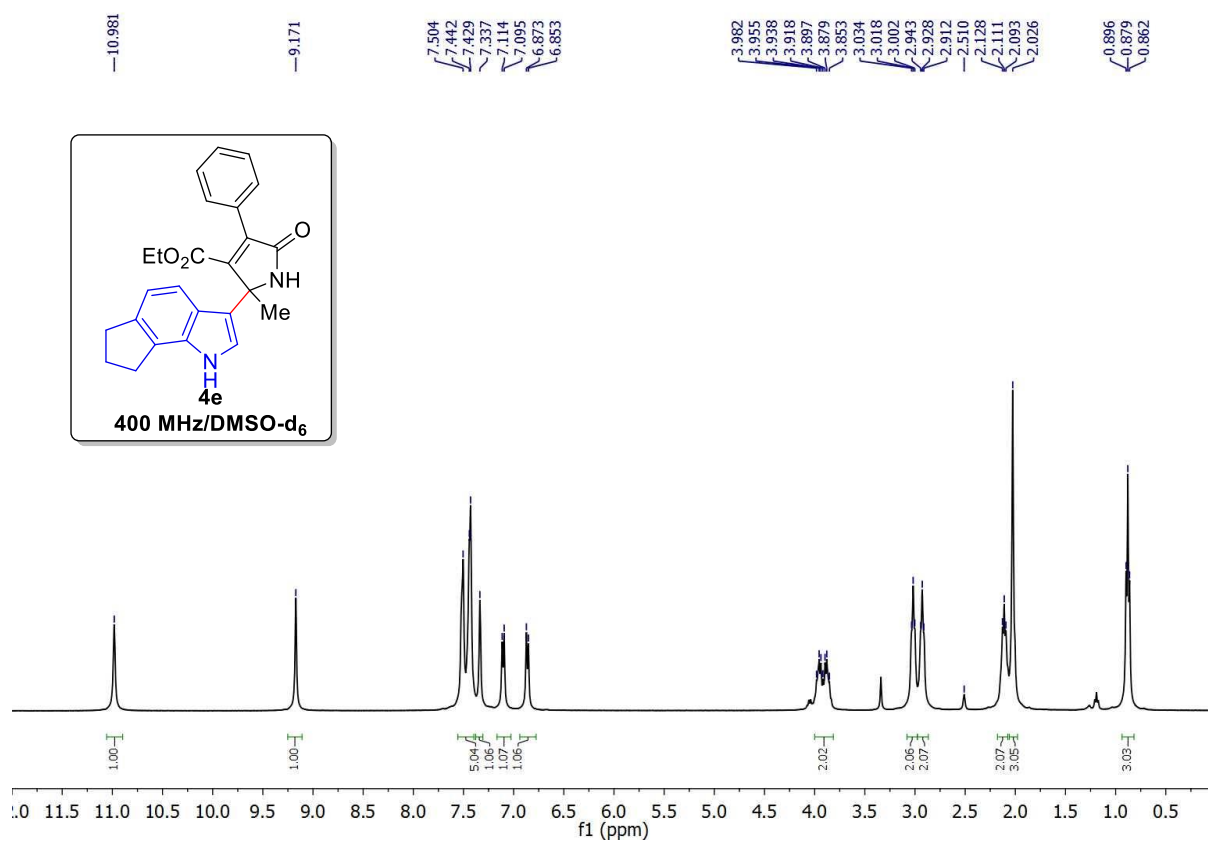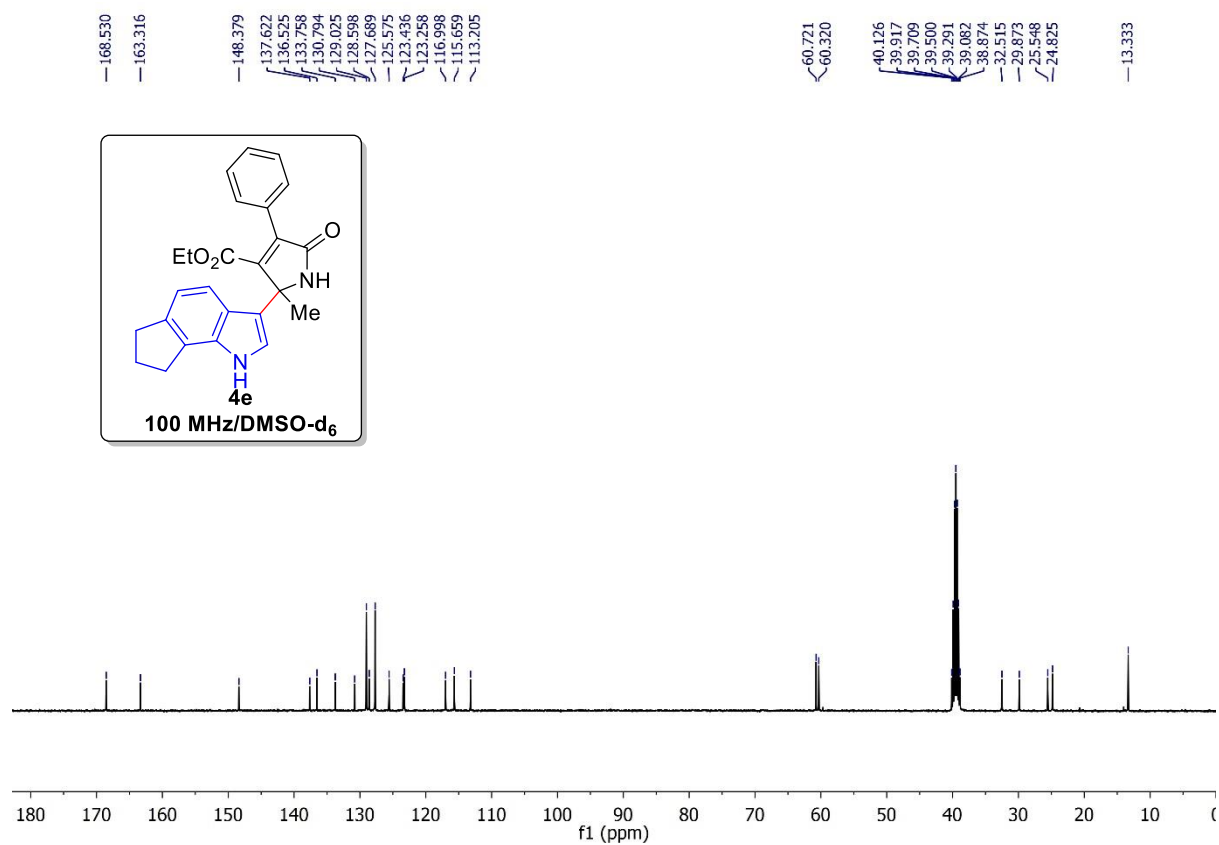

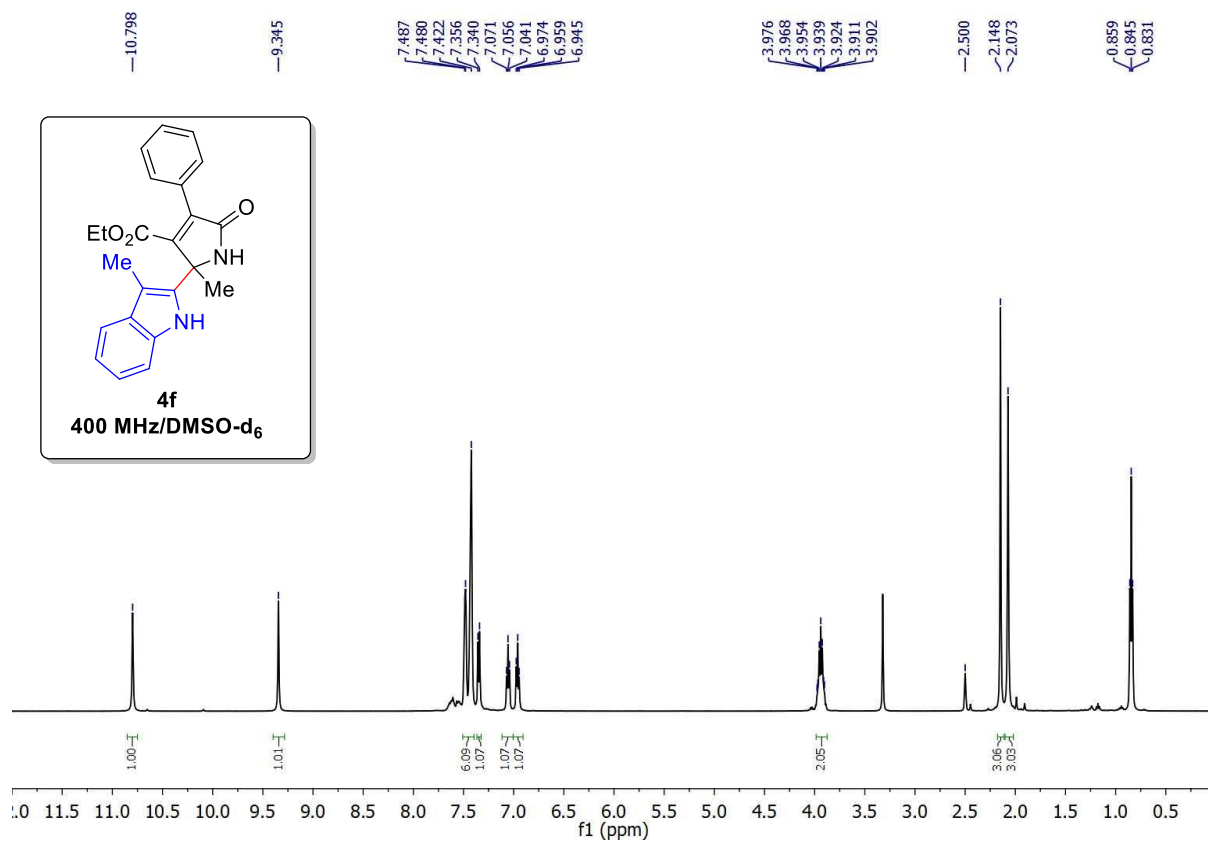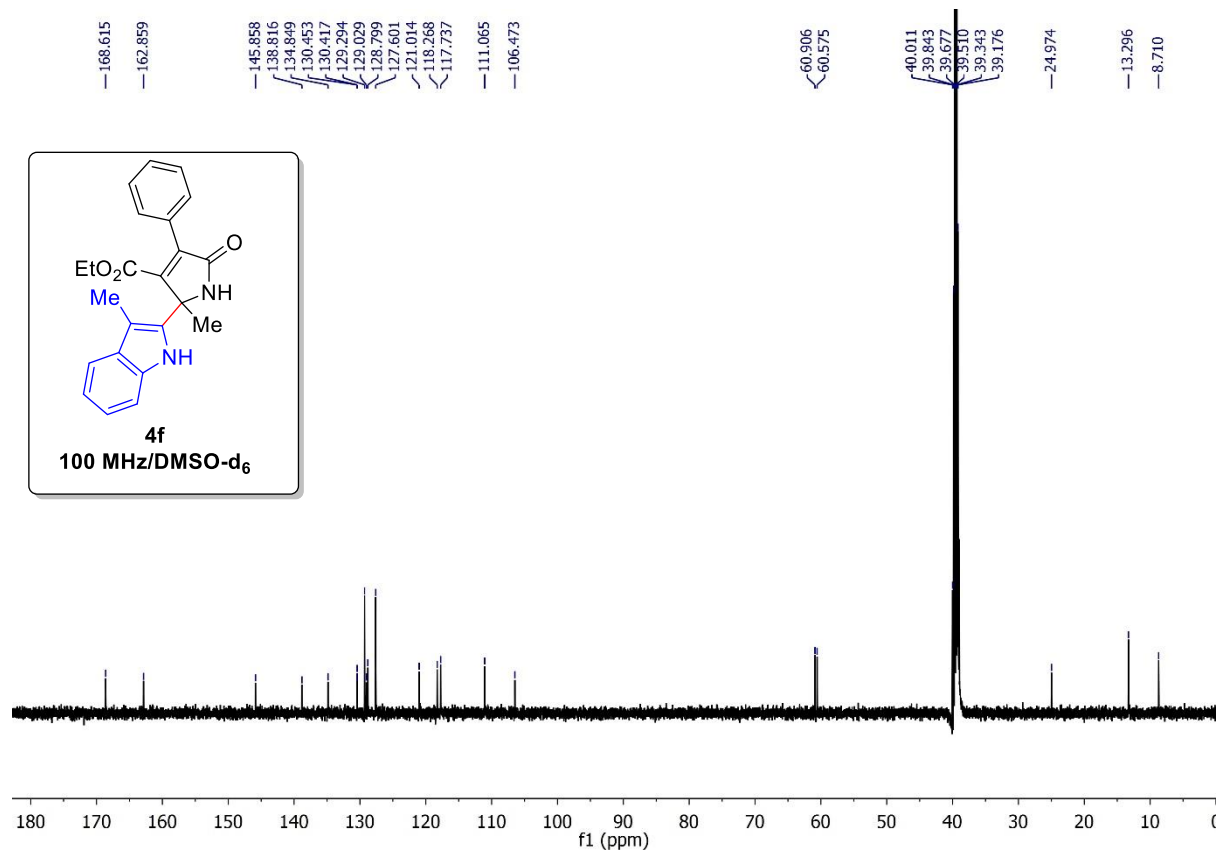

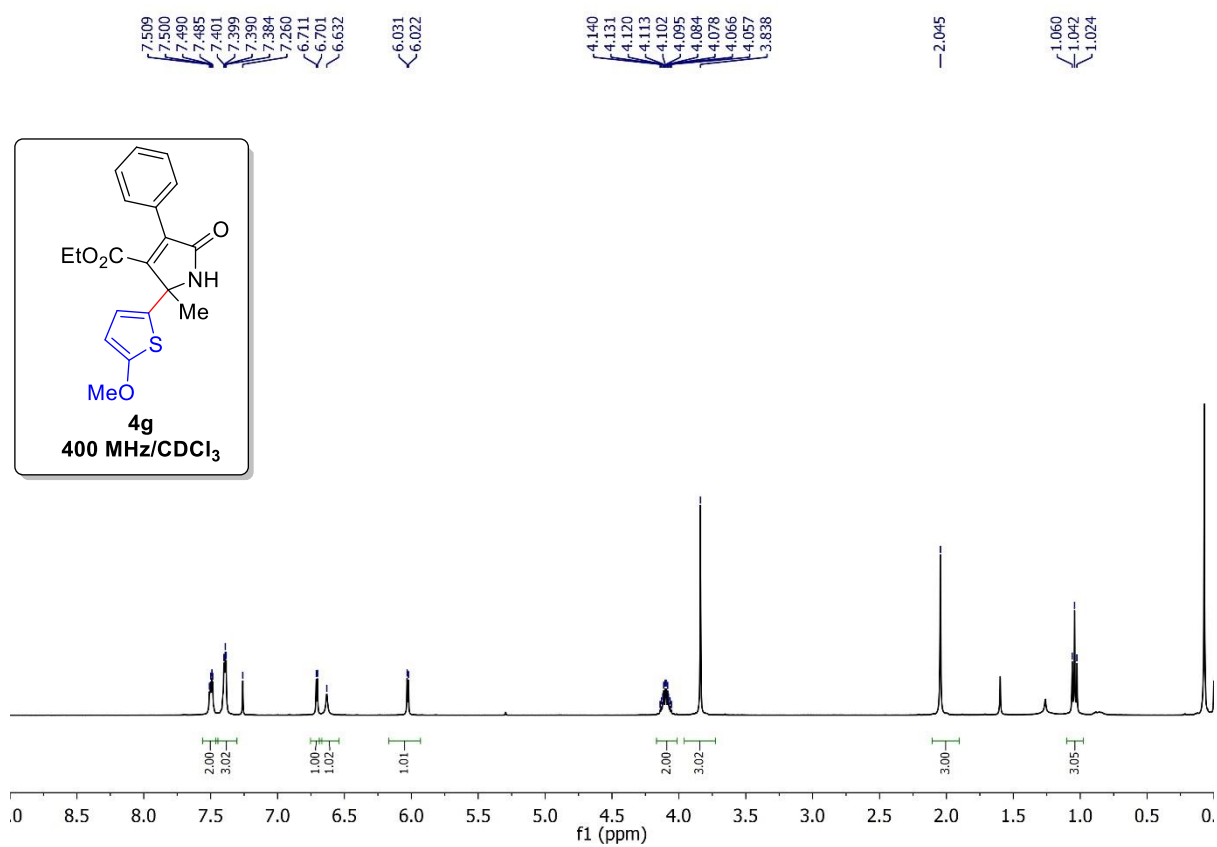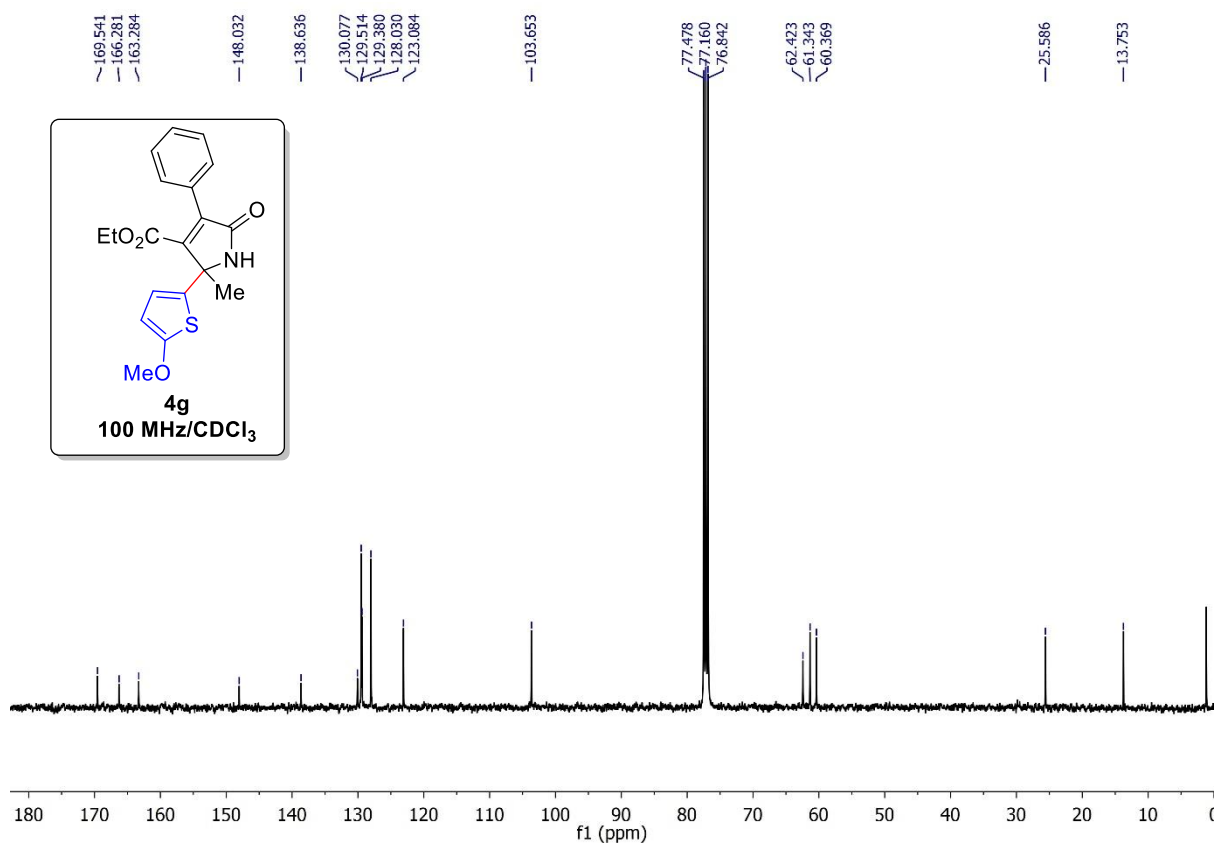

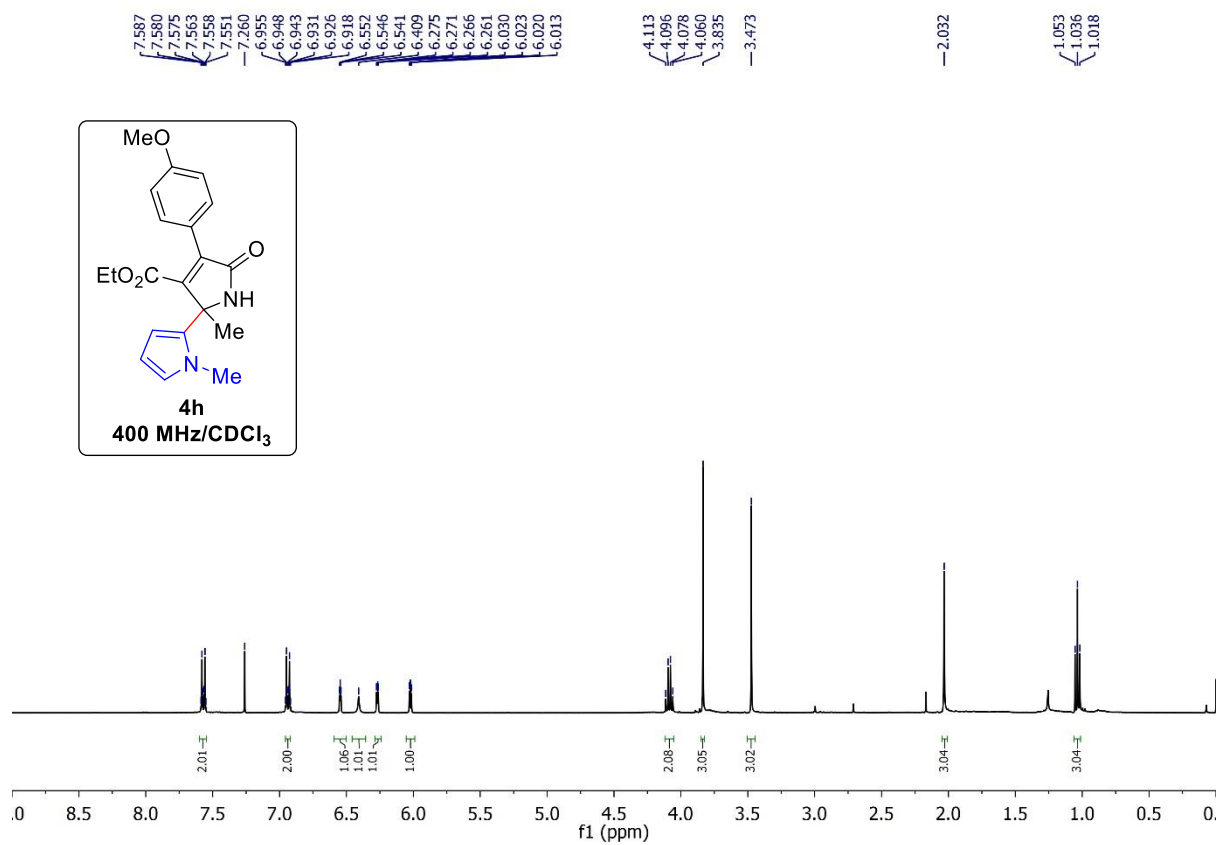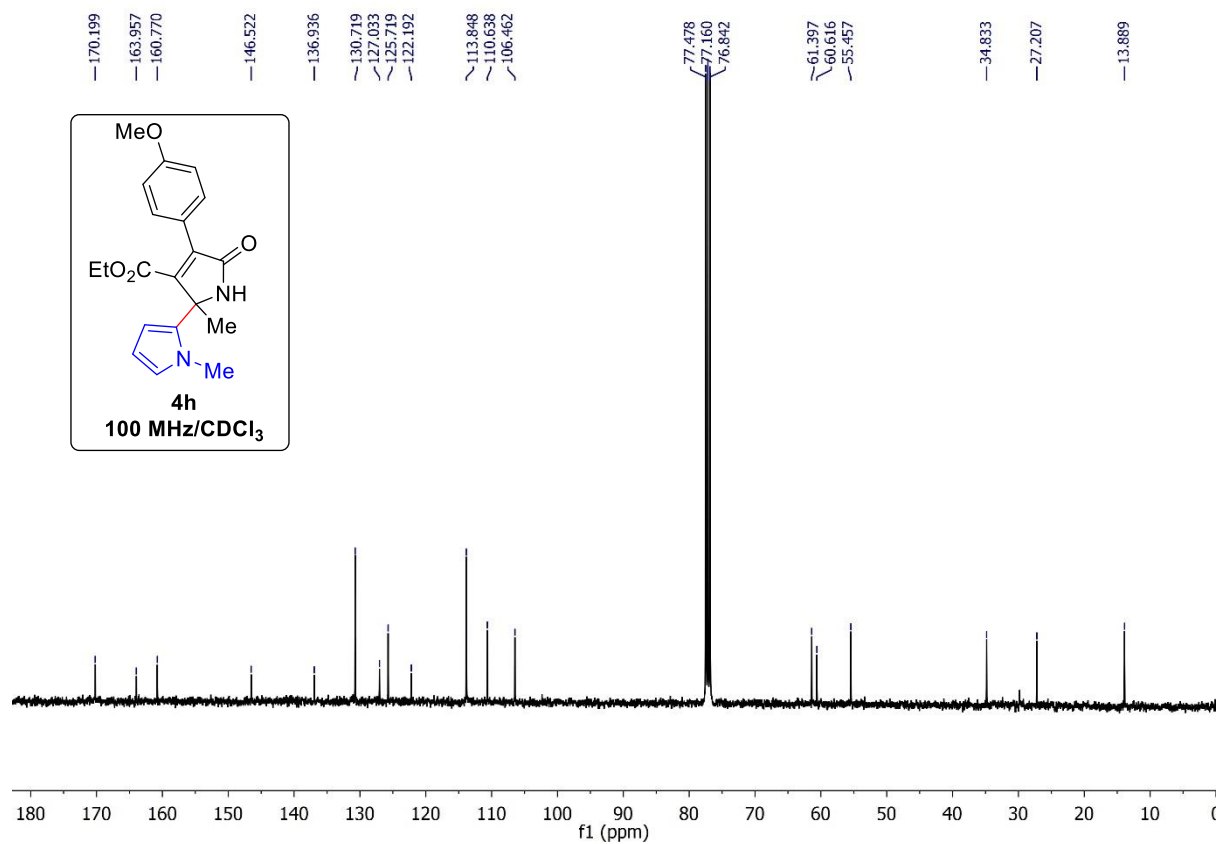



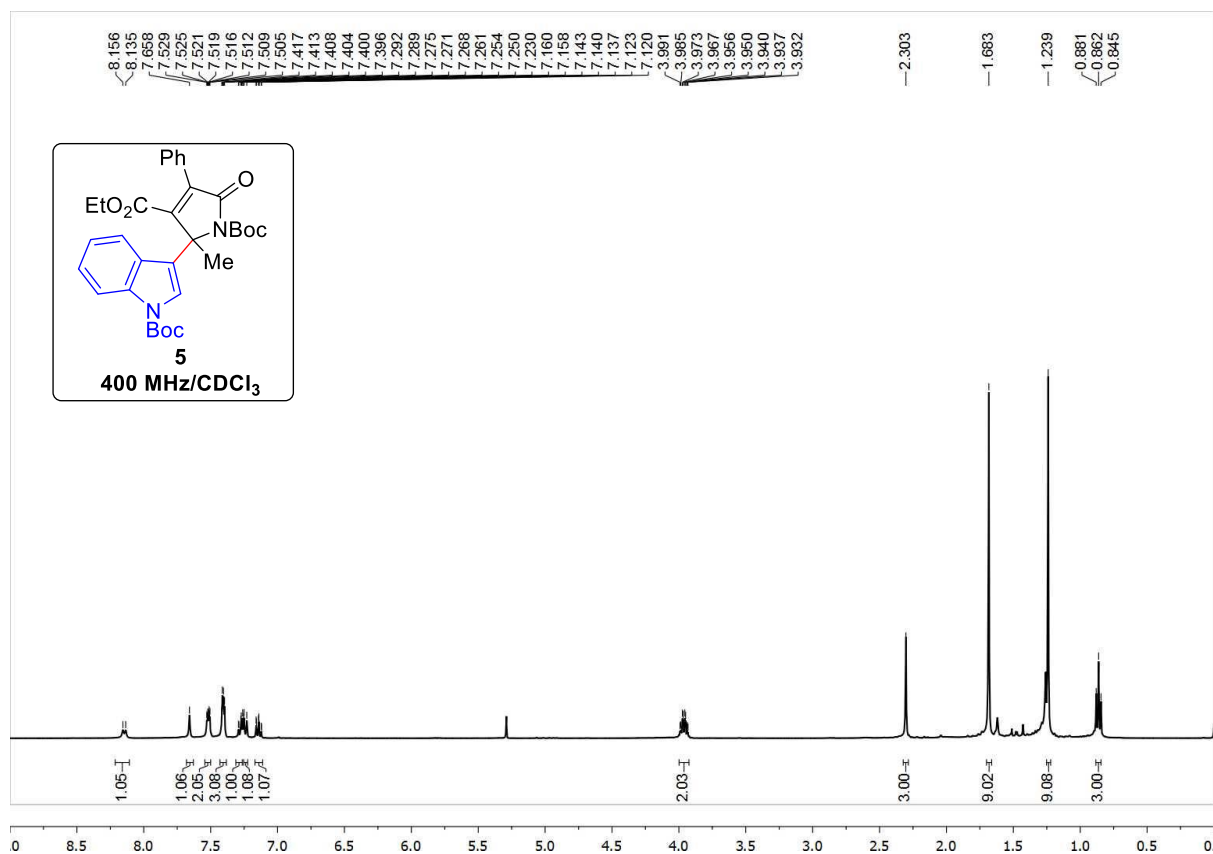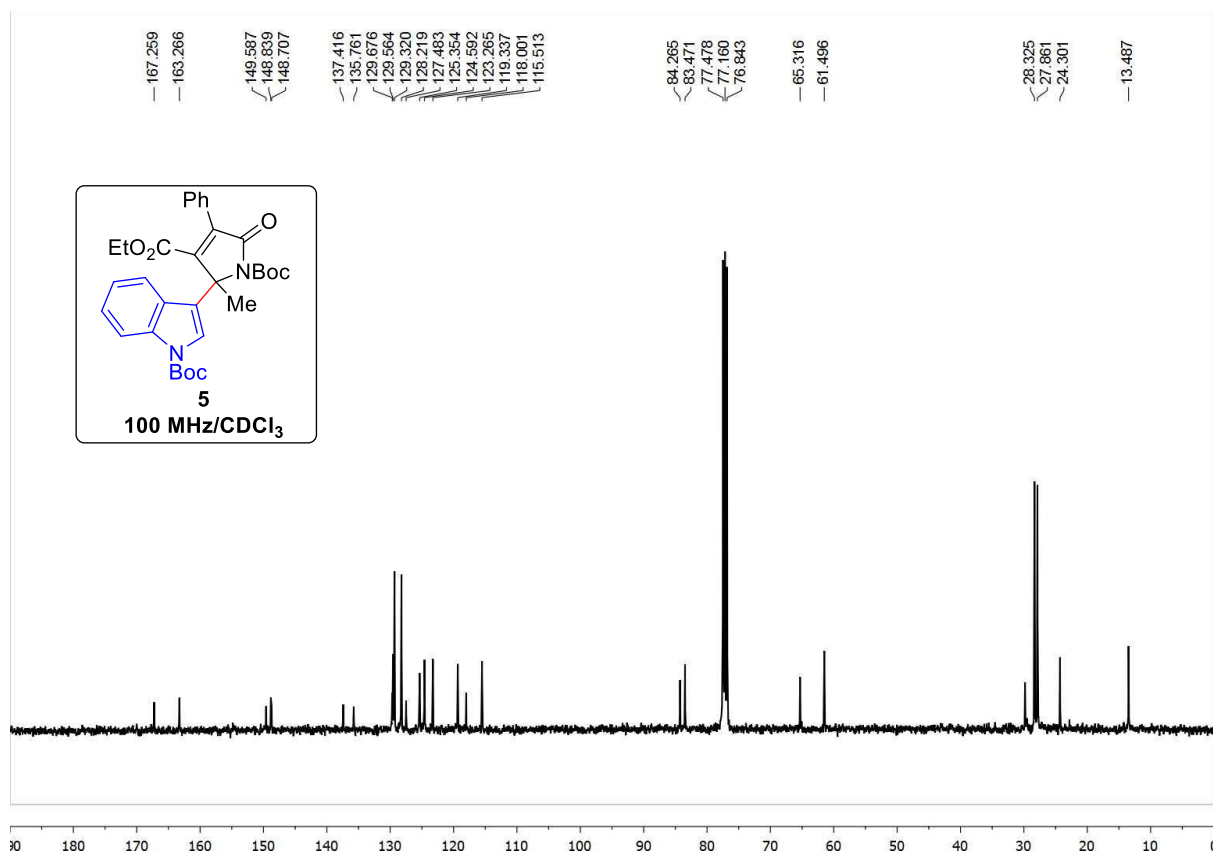

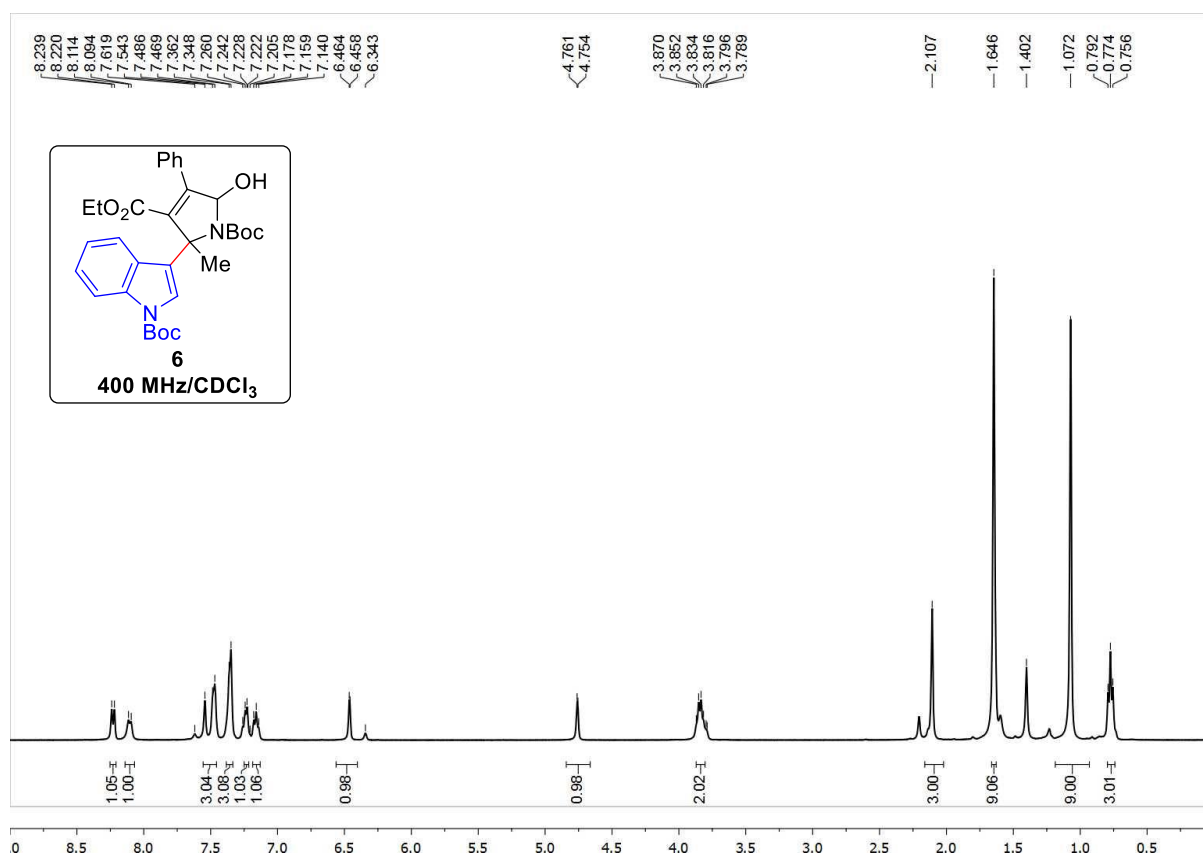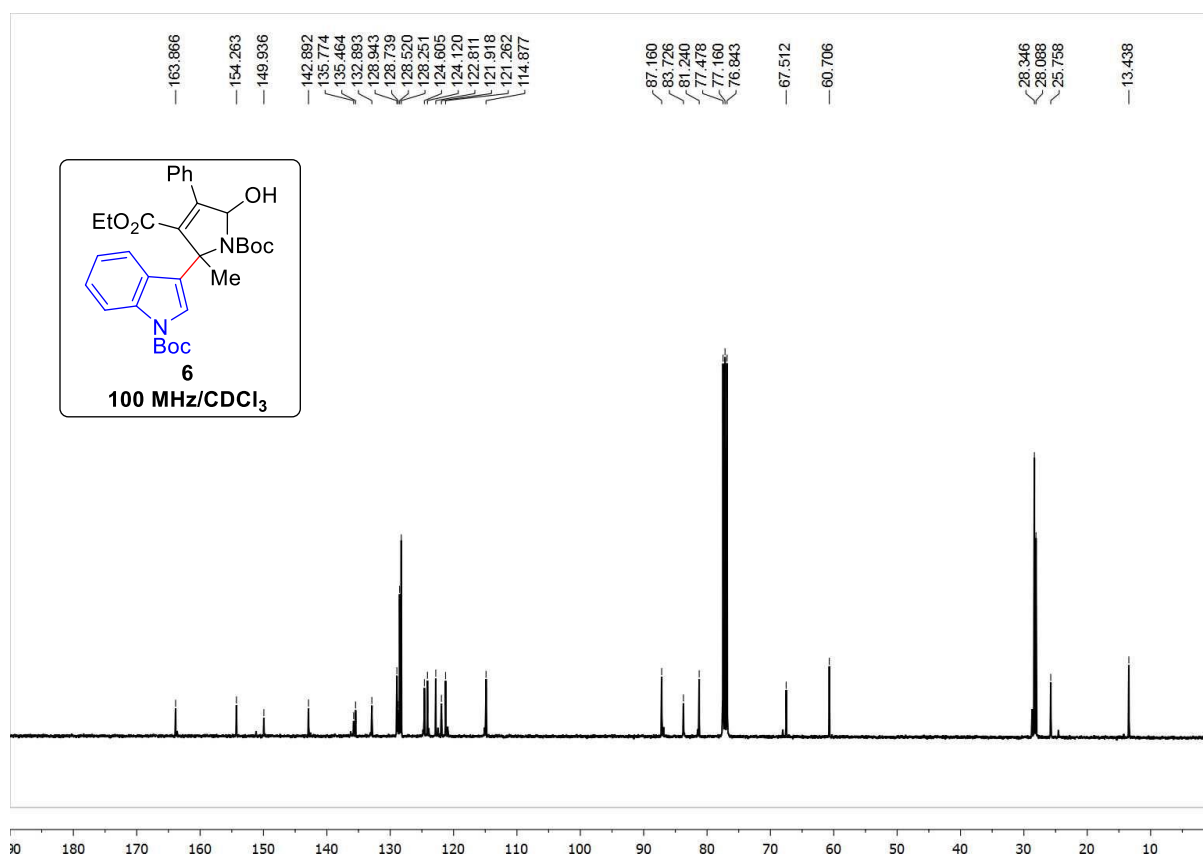

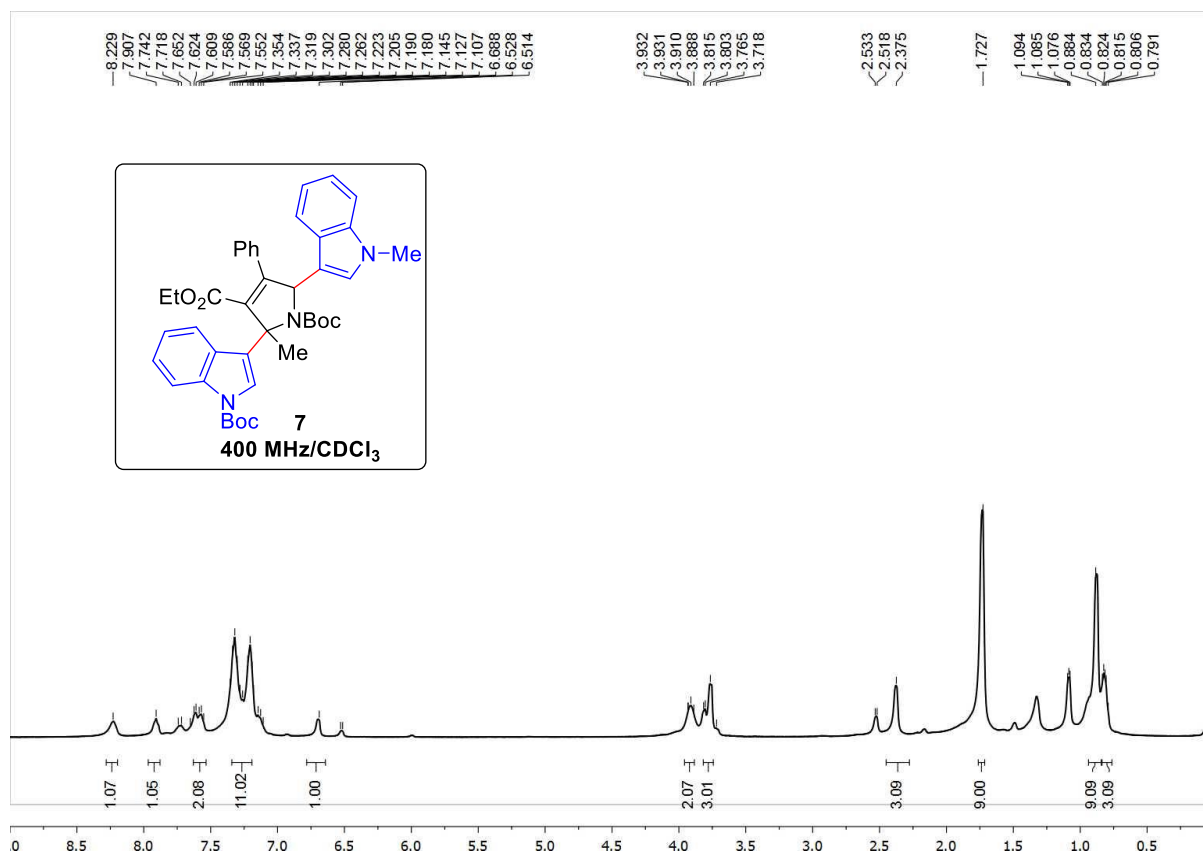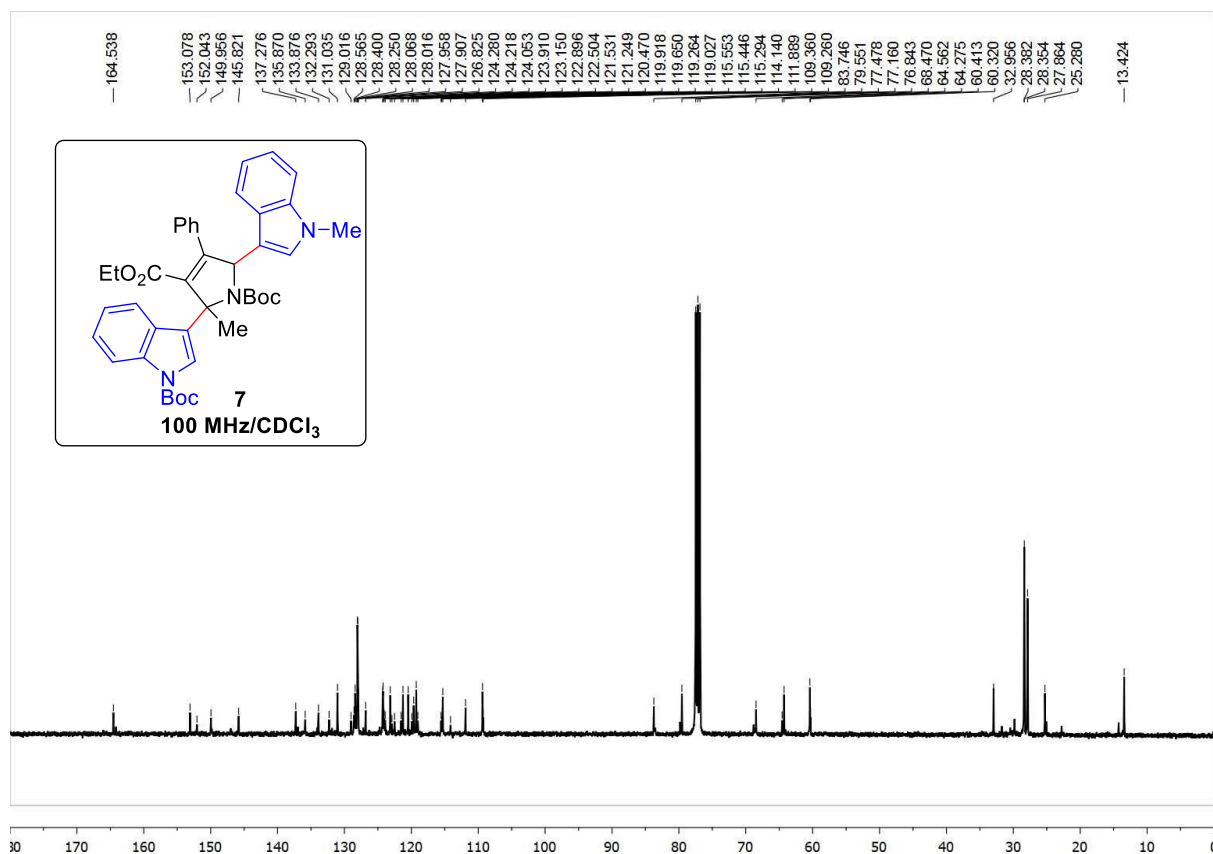

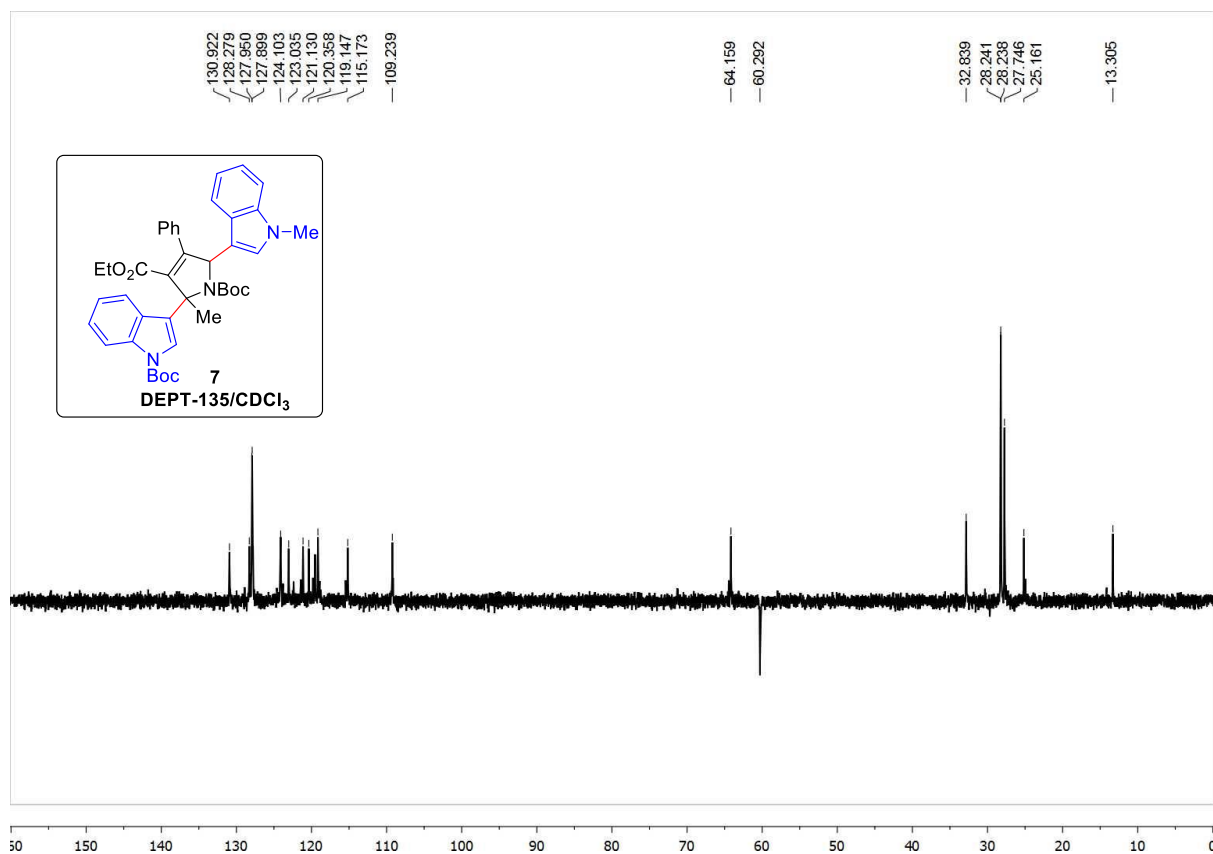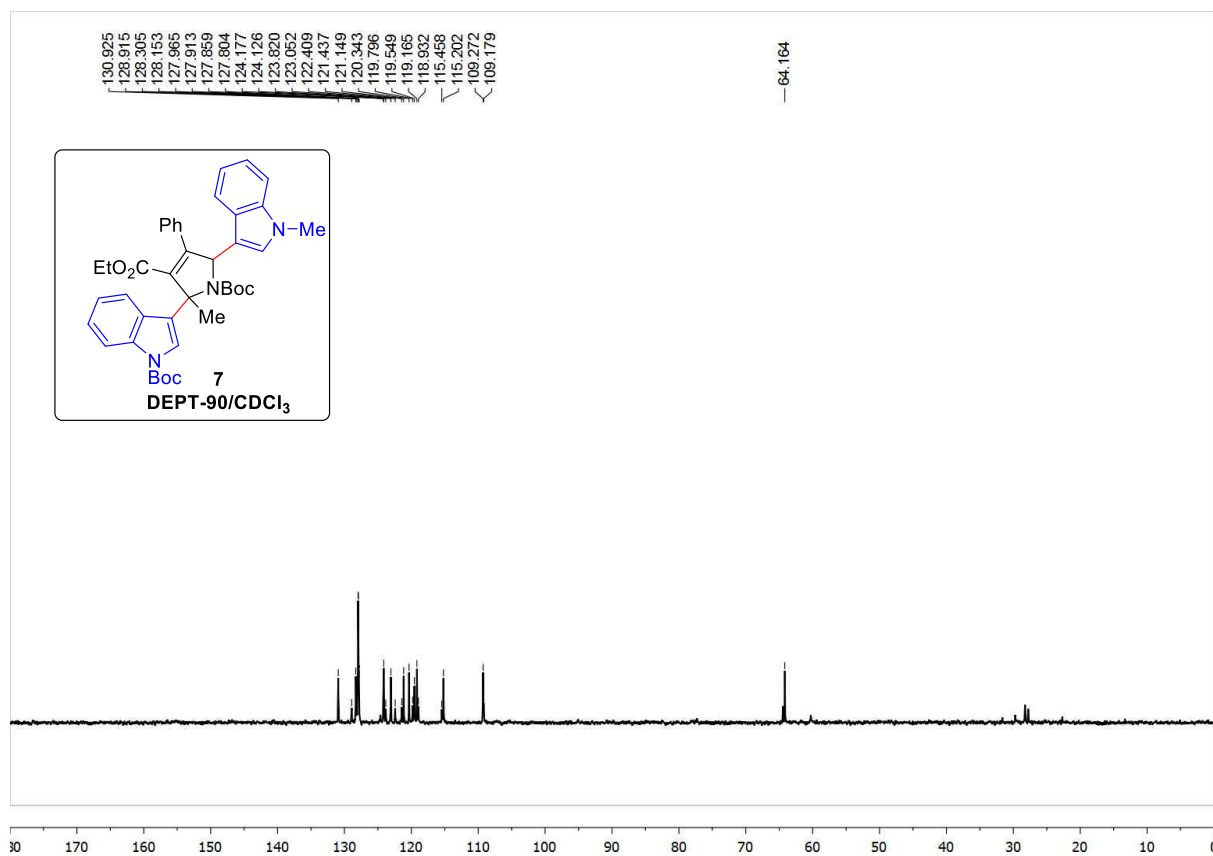

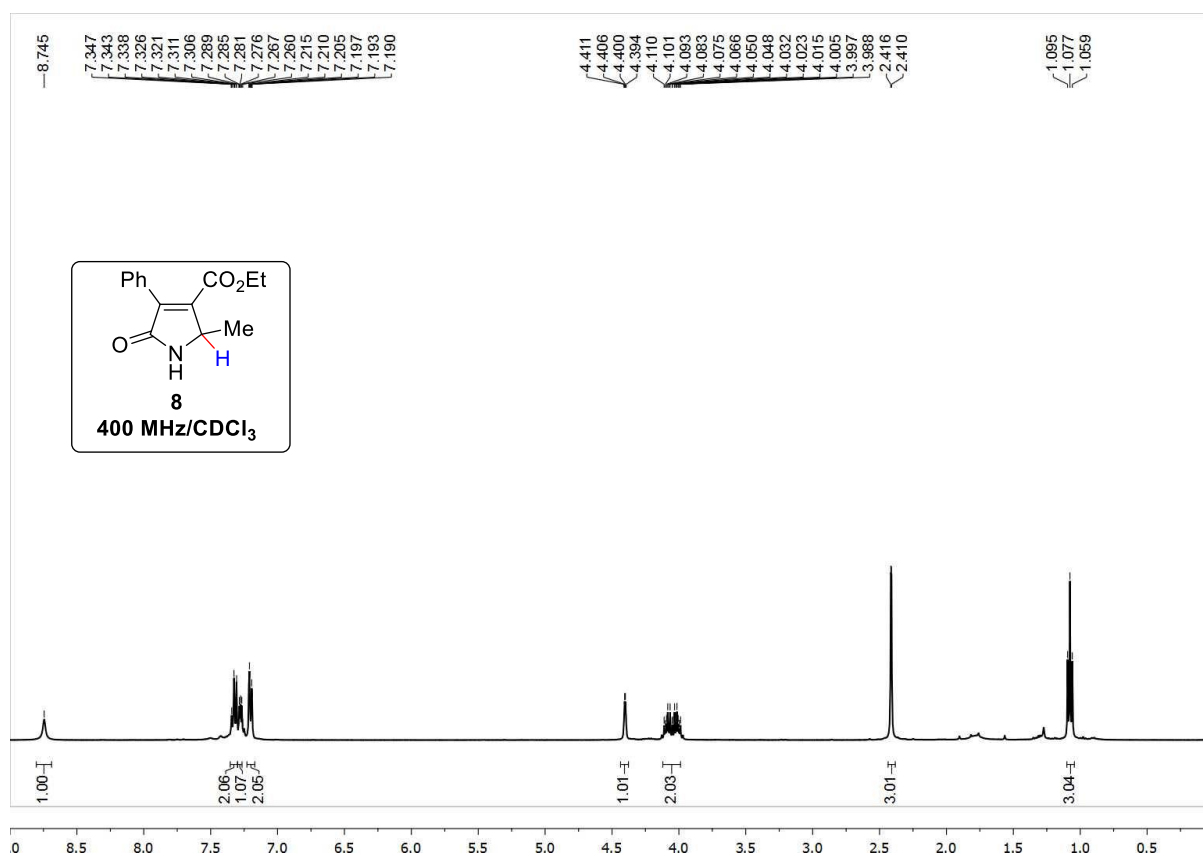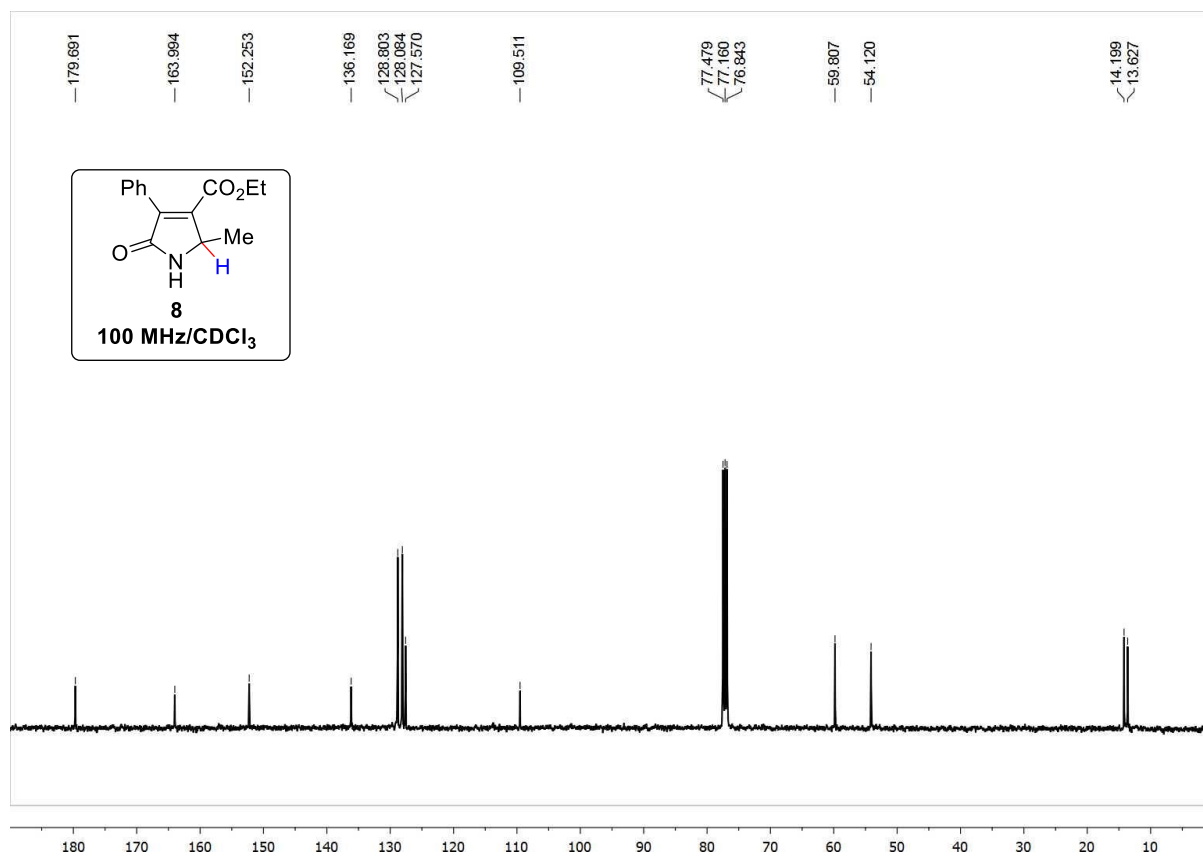

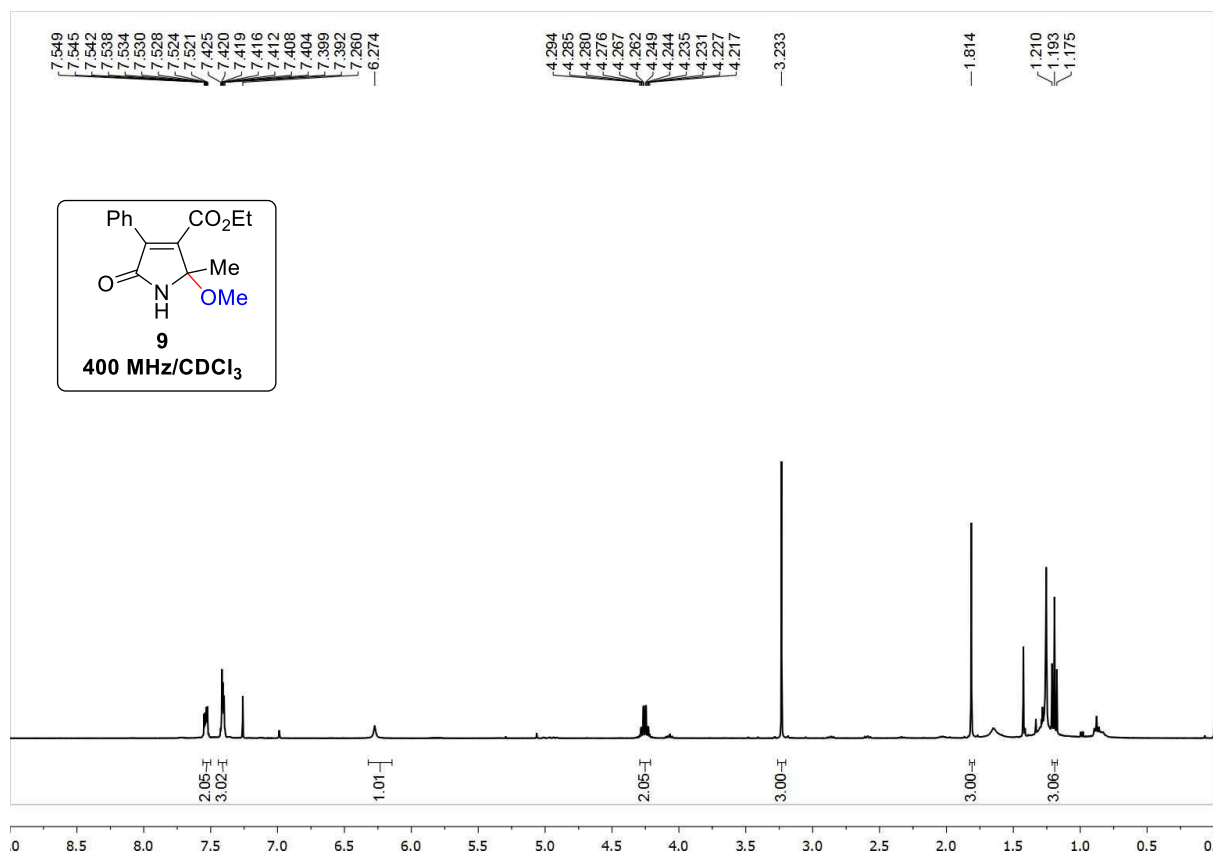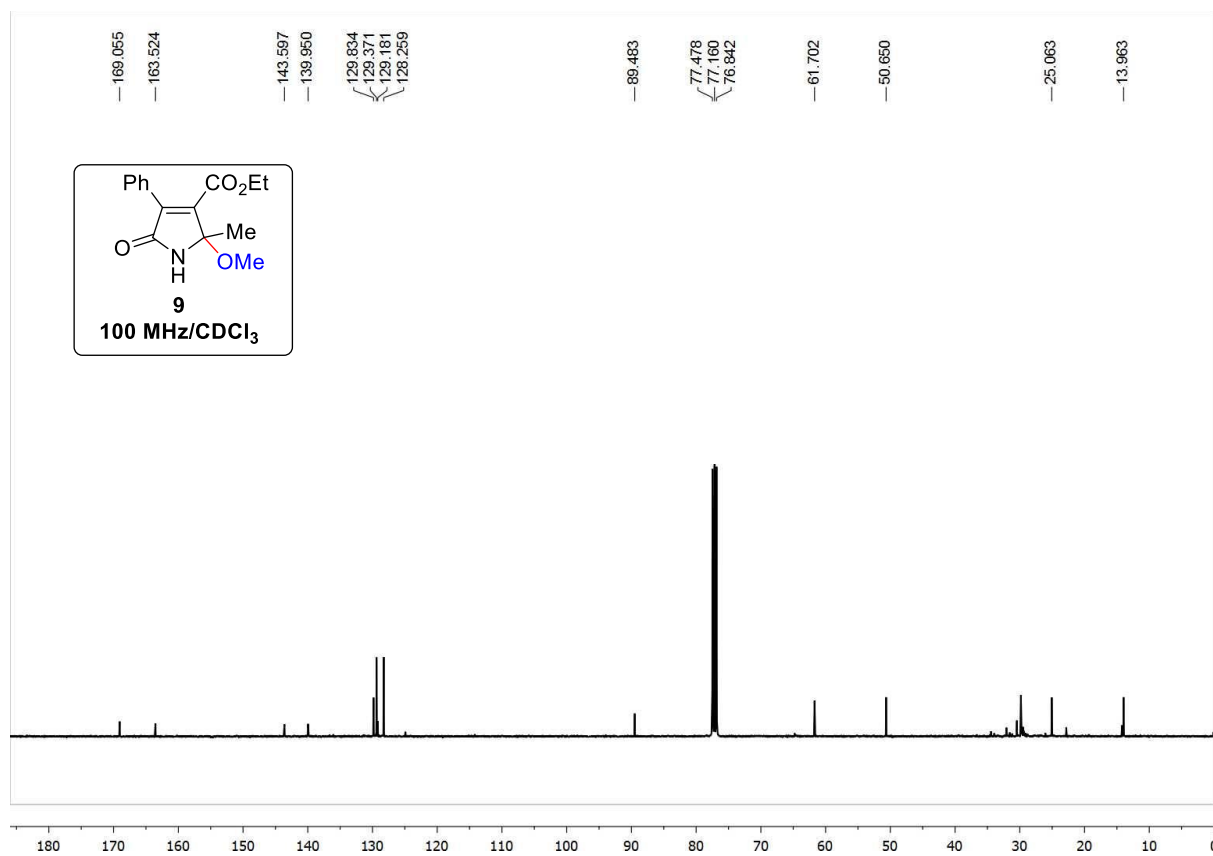

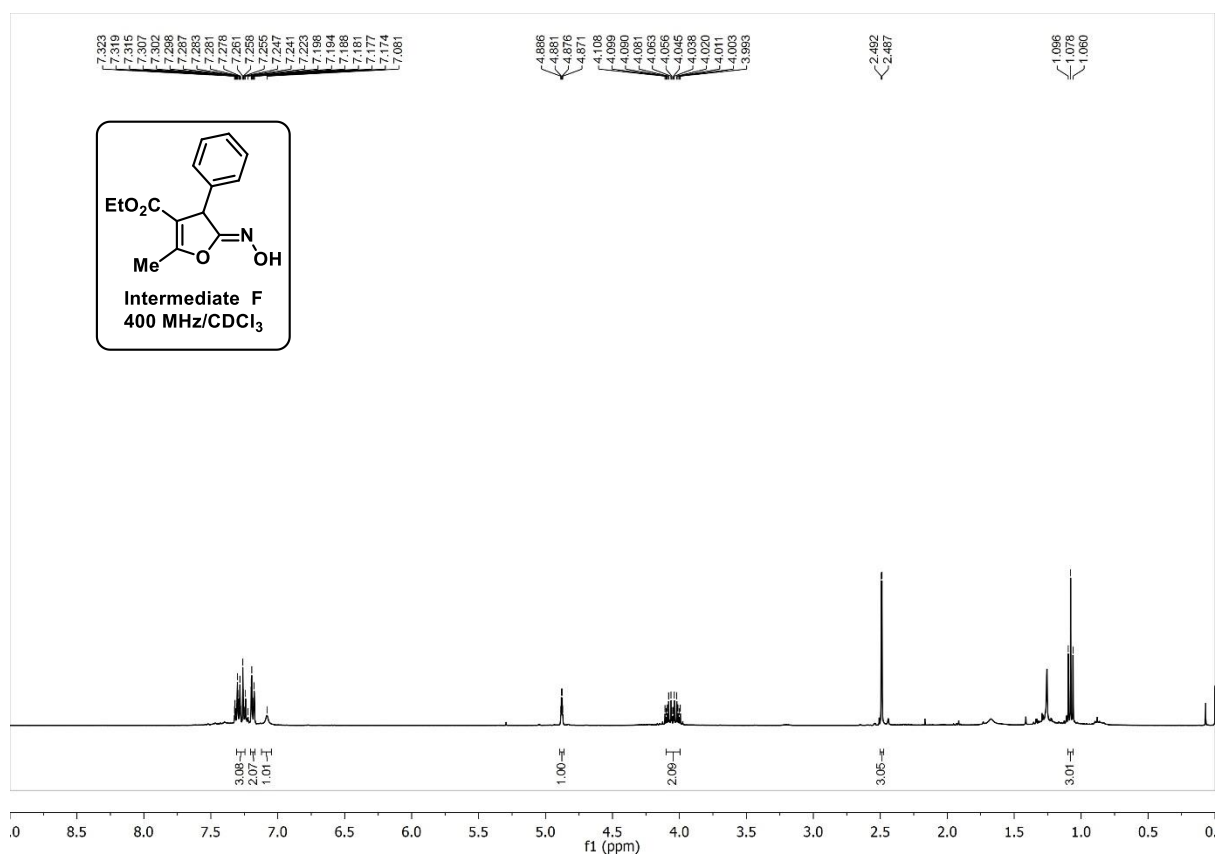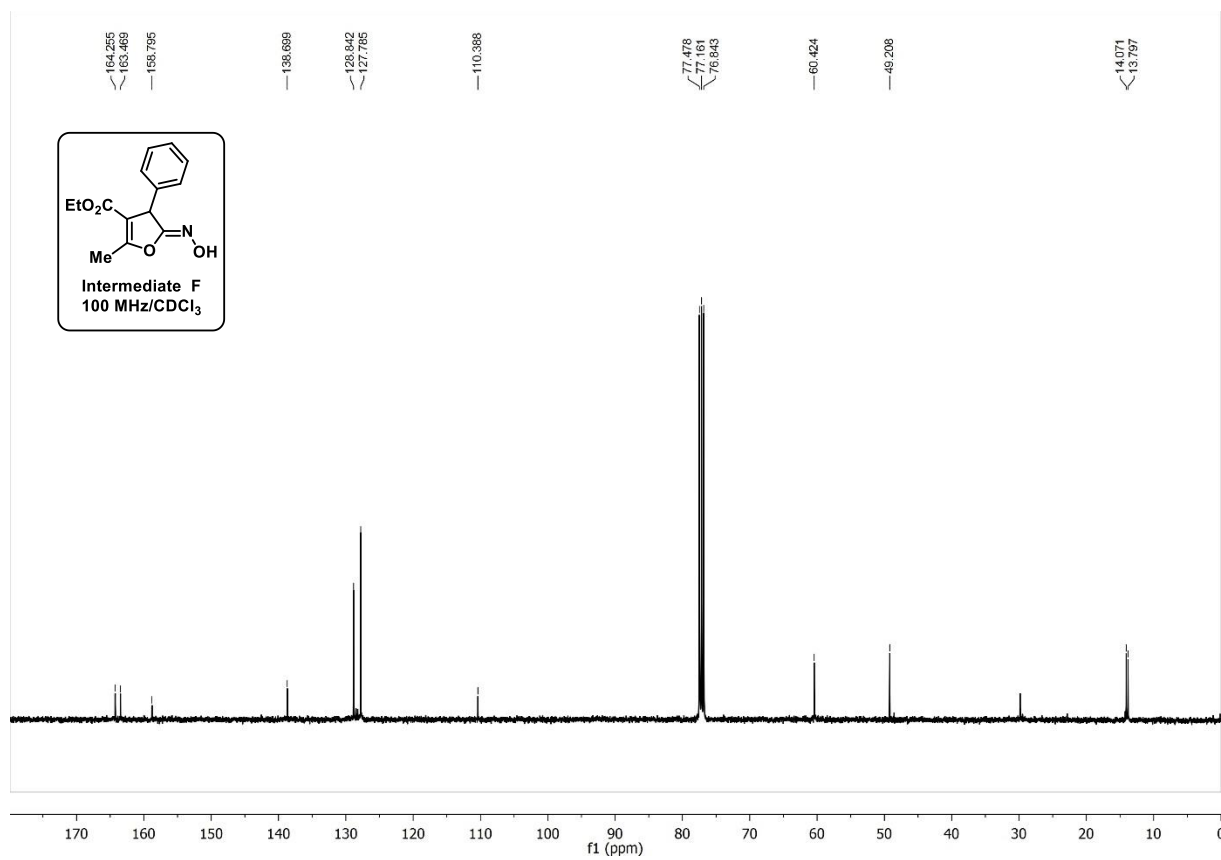

Supplement: Supplementary file 1 [file 27393982]
